# Supplementary material
Source: Springer Nature journal article supplement (https://www.springermedizin.de/resource/supplementary/12881_2007_277_MOESM3_ESM.pdf/9452794)
Supplement: MOESM3 [file 9452794]

Online Table 3: Phenotypes Evaluated for Linkage

| Group | Category          | Trait Label  | Name                                                                         | Linkage Link                                                                                                                                                        |
|-------|-------------------|--------------|------------------------------------------------------------------------------|---------------------------------------------------------------------------------------------------------------------------------------------------------------------|
| Aging | BoneAging         | BUA          | Bone Ultrasound attenuation measured by QUS, multivariable adjusted          | <a href="http://www.ncbi.nlm.nih.gov/projects/gap/cgi-bin/analysis.cgi?id=pha001997">http://www.ncbi.nlm.nih.gov/projects/gap/cgi-bin/analysis.cgi?id=pha001997</a> |
| Aging | BoneAging         | BUAof        | Bone Ultrasound attenuation (Offspring), multivariable adjusted              | <a href="http://www.ncbi.nlm.nih.gov/projects/gap/cgi-bin/analysis.cgi?id=pha002014">http://www.ncbi.nlm.nih.gov/projects/gap/cgi-bin/analysis.cgi?id=pha002014</a> |
| Aging | BoneAging         | deltaOSSR    | Bone age by osseographic scoring system, multivariable adjusted              | <a href="http://www.ncbi.nlm.nih.gov/projects/gap/cgi-bin/analysis.cgi?id=pha002015">http://www.ncbi.nlm.nih.gov/projects/gap/cgi-bin/analysis.cgi?id=pha002015</a> |
| Aging | BoneAging         | FNBMd        | Femoral Neck BMD measured by DXA, multivariable adjusted                     | <a href="http://www.ncbi.nlm.nih.gov/projects/gap/cgi-bin/analysis.cgi?id=pha001998">http://www.ncbi.nlm.nih.gov/projects/gap/cgi-bin/analysis.cgi?id=pha001998</a> |
| Aging | BoneAging         | NeckCSMDof   | Femoral Neck BMD measured by DXA (Offspring), multivariable adjusted         | <a href="http://www.ncbi.nlm.nih.gov/projects/gap/cgi-bin/analysis.cgi?id=pha002016">http://www.ncbi.nlm.nih.gov/projects/gap/cgi-bin/analysis.cgi?id=pha002016</a> |
| Aging | BoneAging         | LSBMD        | Lumbar Spine BMD measured by DXA, multivariable adjusted                     | <a href="http://www.ncbi.nlm.nih.gov/projects/gap/cgi-bin/analysis.cgi?id=pha001999">http://www.ncbi.nlm.nih.gov/projects/gap/cgi-bin/analysis.cgi?id=pha001999</a> |
| Aging | BoneAging         | LSBMDof      | Spine BMD measured by DXA (Offspring), multivariable adjusted                | <a href="http://www.ncbi.nlm.nih.gov/projects/gap/cgi-bin/analysis.cgi?id=pha002019">http://www.ncbi.nlm.nih.gov/projects/gap/cgi-bin/analysis.cgi?id=pha002019</a> |
| Aging | BoneAging         | NeckCSMI     | Hip geometry by DXA (Neck Moment of Inertia), age- and sex-adjusted          | <a href="http://www.ncbi.nlm.nih.gov/projects/gap/cgi-bin/analysis.cgi?id=pha002000">http://www.ncbi.nlm.nih.gov/projects/gap/cgi-bin/analysis.cgi?id=pha002000</a> |
| Aging | BoneAging         | NeckCSMI1    | Hip geometry by DXA (Neck Moment of Inertia), multivariable adjusted         | <a href="http://www.ncbi.nlm.nih.gov/projects/gap/cgi-bin/analysis.cgi?id=pha002001">http://www.ncbi.nlm.nih.gov/projects/gap/cgi-bin/analysis.cgi?id=pha002001</a> |
| Aging | BoneAging         | NeckLeng     | Hip geometry by DXA (Neck Length), age- and sex-adjusted                     | <a href="http://www.ncbi.nlm.nih.gov/projects/gap/cgi-bin/analysis.cgi?id=pha002002">http://www.ncbi.nlm.nih.gov/projects/gap/cgi-bin/analysis.cgi?id=pha002002</a> |
| Aging | BoneAging         | NeckLeng1    | Hip geometry by DXA (Neck Length), multivariable adjusted                    | <a href="http://www.ncbi.nlm.nih.gov/projects/gap/cgi-bin/analysis.cgi?id=pha002003">http://www.ncbi.nlm.nih.gov/projects/gap/cgi-bin/analysis.cgi?id=pha002003</a> |
| Aging | BoneAging         | NeckW        | Hip geometry by DXA (Neck Width), age- and sex-adjusted                      | <a href="http://www.ncbi.nlm.nih.gov/projects/gap/cgi-bin/analysis.cgi?id=pha002004">http://www.ncbi.nlm.nih.gov/projects/gap/cgi-bin/analysis.cgi?id=pha002004</a> |
| Aging | BoneAging         | NeckW1       | Hip geometry by DXA (Neck Width), multivariable adjusted                     | <a href="http://www.ncbi.nlm.nih.gov/projects/gap/cgi-bin/analysis.cgi?id=pha002005">http://www.ncbi.nlm.nih.gov/projects/gap/cgi-bin/analysis.cgi?id=pha002005</a> |
| Aging | BoneAging         | NeckZ        | Hip geometry by DXA (Neck Section Modulus), age- and sex-adjusted            | <a href="http://www.ncbi.nlm.nih.gov/projects/gap/cgi-bin/analysis.cgi?id=pha002006">http://www.ncbi.nlm.nih.gov/projects/gap/cgi-bin/analysis.cgi?id=pha002006</a> |
| Aging | BoneAging         | NeckZ1       | Hip geometry by DXA (Neck Section Modulus), multivariable adjusted           | <a href="http://www.ncbi.nlm.nih.gov/projects/gap/cgi-bin/analysis.cgi?id=pha002007">http://www.ncbi.nlm.nih.gov/projects/gap/cgi-bin/analysis.cgi?id=pha002007</a> |
| Aging | BoneAging         | NSA          | Hip geometry by DXA (Neck-Shaft Angle), age- and sex-adjusted                | <a href="http://www.ncbi.nlm.nih.gov/projects/gap/cgi-bin/analysis.cgi?id=pha002008">http://www.ncbi.nlm.nih.gov/projects/gap/cgi-bin/analysis.cgi?id=pha002008</a> |
| Aging | BoneAging         | NSA1         | Hip geometry by DXA (Neck-Shaft Angle), multivariable adjusted               | <a href="http://www.ncbi.nlm.nih.gov/projects/gap/cgi-bin/analysis.cgi?id=pha002009">http://www.ncbi.nlm.nih.gov/projects/gap/cgi-bin/analysis.cgi?id=pha002009</a> |
| Aging | BoneAging         | ShaftCSMI1R  | Hip geometry (Shaft CSMI), multivariable adjusted                            | <a href="http://www.ncbi.nlm.nih.gov/projects/gap/cgi-bin/analysis.cgi?id=pha002020">http://www.ncbi.nlm.nih.gov/projects/gap/cgi-bin/analysis.cgi?id=pha002020</a> |
| Aging | BoneAging         | ShaftW       | Hip geometry by DXA (Shaft Width), age- and sex-adjusted                     | <a href="http://www.ncbi.nlm.nih.gov/projects/gap/cgi-bin/analysis.cgi?id=pha002010">http://www.ncbi.nlm.nih.gov/projects/gap/cgi-bin/analysis.cgi?id=pha002010</a> |
| Aging | BoneAging         | ShaftW1      | Hip geometry by DXA (Shaft Width), multivariable adjusted                    | <a href="http://www.ncbi.nlm.nih.gov/projects/gap/cgi-bin/analysis.cgi?id=pha002011">http://www.ncbi.nlm.nih.gov/projects/gap/cgi-bin/analysis.cgi?id=pha002011</a> |
| Aging | BoneAging         | ShaftZ1R     | Hip geometry (Shaft Section Modulus), multivariable adjusted                 | <a href="http://www.ncbi.nlm.nih.gov/projects/gap/cgi-bin/analysis.cgi?id=pha002021">http://www.ncbi.nlm.nih.gov/projects/gap/cgi-bin/analysis.cgi?id=pha002021</a> |
| Aging | BoneAging         | SOS          | Bone Ultrasound speed measured by QUS, multivariable adjusted                | <a href="http://www.ncbi.nlm.nih.gov/projects/gap/cgi-bin/analysis.cgi?id=pha002012">http://www.ncbi.nlm.nih.gov/projects/gap/cgi-bin/analysis.cgi?id=pha002012</a> |
| Aging | BoneAging         | SOSof        | Bone Ultrasound speed (Offspring), multivariable adjusted                    | <a href="http://www.ncbi.nlm.nih.gov/projects/gap/cgi-bin/analysis.cgi?id=pha002022">http://www.ncbi.nlm.nih.gov/projects/gap/cgi-bin/analysis.cgi?id=pha002022</a> |
| Aging | BoneAging         | TRBMD        | Trochanter BMD measured by DXA, multivariable adjusted                       | <a href="http://www.ncbi.nlm.nih.gov/projects/gap/cgi-bin/analysis.cgi?id=pha002013">http://www.ncbi.nlm.nih.gov/projects/gap/cgi-bin/analysis.cgi?id=pha002013</a> |
| Aging | BoneAging         | TRBMDof      | Troch BMD measured by DXA (Offspring), multivariable adjusted                | <a href="http://www.ncbi.nlm.nih.gov/projects/gap/cgi-bin/analysis.cgi?id=pha002023">http://www.ncbi.nlm.nih.gov/projects/gap/cgi-bin/analysis.cgi?id=pha002023</a> |
| Aging | BrainMRI          | AFBV         | Frontal lobe to intracranial volume ratio, multivariable adjusted            | <a href="http://www.ncbi.nlm.nih.gov/projects/gap/cgi-bin/analysis.cgi?id=pha002024">http://www.ncbi.nlm.nih.gov/projects/gap/cgi-bin/analysis.cgi?id=pha002024</a> |
| Aging | BrainMRI          | AHPV         | Hippocampal to intracranial volume ratio, multivariable adjusted             | <a href="http://www.ncbi.nlm.nih.gov/projects/gap/cgi-bin/analysis.cgi?id=pha002025">http://www.ncbi.nlm.nih.gov/projects/gap/cgi-bin/analysis.cgi?id=pha002025</a> |
| Aging | BrainMRI          | AHPVapoe1    | Hippocampal to intracranial volume ratio, multivariable with APOE            | <a href="http://www.ncbi.nlm.nih.gov/projects/gap/cgi-bin/analysis.cgi?id=pha002042">http://www.ncbi.nlm.nih.gov/projects/gap/cgi-bin/analysis.cgi?id=pha002042</a> |
| Aging | BrainMRI          | AHPVr        | Hippocampal to total cerebral volume ratio, multivariable adjusted           | <a href="http://www.ncbi.nlm.nih.gov/projects/gap/cgi-bin/analysis.cgi?id=pha002026">http://www.ncbi.nlm.nih.gov/projects/gap/cgi-bin/analysis.cgi?id=pha002026</a> |
| Aging | BrainMRI          | AHPVrapoe1   | Hippocampal to total cerebral volume ratio, multivariable with APOE          | <a href="http://www.ncbi.nlm.nih.gov/projects/gap/cgi-bin/analysis.cgi?id=pha002043">http://www.ncbi.nlm.nih.gov/projects/gap/cgi-bin/analysis.cgi?id=pha002043</a> |
| Aging | BrainMRI          | ALLV         | Log lateral ventricular to intracranial volume ratio, multivariable adjusted | <a href="http://www.ncbi.nlm.nih.gov/projects/gap/cgi-bin/analysis.cgi?id=pha002027">http://www.ncbi.nlm.nih.gov/projects/gap/cgi-bin/analysis.cgi?id=pha002027</a> |
| Aging | BrainMRI          | ALWMHIVapoe1 | Log white matter hyperintensity to cranial ratio, multivariable with APOE    | <a href="http://www.ncbi.nlm.nih.gov/projects/gap/cgi-bin/analysis.cgi?id=pha002044">http://www.ncbi.nlm.nih.gov/projects/gap/cgi-bin/analysis.cgi?id=pha002044</a> |
| Aging | BrainMRI          | AOBV         | Occipital lobe to intracranial volume ratio, multivariable adjusted          | <a href="http://www.ncbi.nlm.nih.gov/projects/gap/cgi-bin/analysis.cgi?id=pha002028">http://www.ncbi.nlm.nih.gov/projects/gap/cgi-bin/analysis.cgi?id=pha002028</a> |
| Aging | BrainMRI          | APBV         | Parietal lobe to intracranial volume ratio, multivariable adjusted           | <a href="http://www.ncbi.nlm.nih.gov/projects/gap/cgi-bin/analysis.cgi?id=pha002029">http://www.ncbi.nlm.nih.gov/projects/gap/cgi-bin/analysis.cgi?id=pha002029</a> |
| Aging | BrainMRI          | ATCBV        | Total cerebral brain to intracranial volume ratio, multivariable adjusted    | <a href="http://www.ncbi.nlm.nih.gov/projects/gap/cgi-bin/analysis.cgi?id=pha002030">http://www.ncbi.nlm.nih.gov/projects/gap/cgi-bin/analysis.cgi?id=pha002030</a> |
| Aging | BrainMRI          | ATCBVapoe1   | Total cerebral brain to intracranial volume ratio, multivariable with APOE   | <a href="http://www.ncbi.nlm.nih.gov/projects/gap/cgi-bin/analysis.cgi?id=pha002045">http://www.ncbi.nlm.nih.gov/projects/gap/cgi-bin/analysis.cgi?id=pha002045</a> |
| Aging | BrainMRI          | CFBV         | Frontal lobe to intracranial volume ratio, age and sex adjusted              | <a href="http://www.ncbi.nlm.nih.gov/projects/gap/cgi-bin/analysis.cgi?id=pha002031">http://www.ncbi.nlm.nih.gov/projects/gap/cgi-bin/analysis.cgi?id=pha002031</a> |
| Aging | BrainMRI          | CHPV         | Hippocampal to intracranial volume ratio, age and sex adjusted               | <a href="http://www.ncbi.nlm.nih.gov/projects/gap/cgi-bin/analysis.cgi?id=pha002032">http://www.ncbi.nlm.nih.gov/projects/gap/cgi-bin/analysis.cgi?id=pha002032</a> |
| Aging | BrainMRI          | CHPVr        | Hippocampal to total cerebral volume ratio, age and sex adjusted             | <a href="http://www.ncbi.nlm.nih.gov/projects/gap/cgi-bin/analysis.cgi?id=pha002033">http://www.ncbi.nlm.nih.gov/projects/gap/cgi-bin/analysis.cgi?id=pha002033</a> |
| Aging | BrainMRI          | CLLV         | Log lateral ventricular to intracranial volume ratio, age and sex adjusted   | <a href="http://www.ncbi.nlm.nih.gov/projects/gap/cgi-bin/analysis.cgi?id=pha002034">http://www.ncbi.nlm.nih.gov/projects/gap/cgi-bin/analysis.cgi?id=pha002034</a> |
| Aging | BrainMRI          | COBV         | Occipital lobe to intracranial volume ratio, age and sex adjusted            | <a href="http://www.ncbi.nlm.nih.gov/projects/gap/cgi-bin/analysis.cgi?id=pha002035">http://www.ncbi.nlm.nih.gov/projects/gap/cgi-bin/analysis.cgi?id=pha002035</a> |
| Aging | BrainMRI          | CPBV         | Parietal lobe to intracranial volume ratio, age and sex adjusted             | <a href="http://www.ncbi.nlm.nih.gov/projects/gap/cgi-bin/analysis.cgi?id=pha002036">http://www.ncbi.nlm.nih.gov/projects/gap/cgi-bin/analysis.cgi?id=pha002036</a> |
| Aging | BrainMRI          | CTCBV        | Total cerebral brain to intracranial volume ratio, age and sex adjusted      | <a href="http://www.ncbi.nlm.nih.gov/projects/gap/cgi-bin/analysis.cgi?id=pha002037">http://www.ncbi.nlm.nih.gov/projects/gap/cgi-bin/analysis.cgi?id=pha002037</a> |
| Aging | BrainMRI          | WALTHBV      | Winsorized temporal lobe to intracranial volume ratio, multivariable adj     | <a href="http://www.ncbi.nlm.nih.gov/projects/gap/cgi-bin/analysis.cgi?id=pha002038">http://www.ncbi.nlm.nih.gov/projects/gap/cgi-bin/analysis.cgi?id=pha002038</a> |
| Aging | BrainMRI          | WATBV        | Winsorized log temporal horn to intracranial volume ratio, multivariable     | <a href="http://www.ncbi.nlm.nih.gov/projects/gap/cgi-bin/analysis.cgi?id=pha002039">http://www.ncbi.nlm.nih.gov/projects/gap/cgi-bin/analysis.cgi?id=pha002039</a> |
| Aging | BrainMRI          | WCLTHBV      | Winsorized temporal lobe to intracranial volume ratio, age and sex           | <a href="http://www.ncbi.nlm.nih.gov/projects/gap/cgi-bin/analysis.cgi?id=pha002040">http://www.ncbi.nlm.nih.gov/projects/gap/cgi-bin/analysis.cgi?id=pha002040</a> |
| Aging | BrainMRI          | WCTBV        | Winsorized log temporal horn to intracranial volume ratio, age and sex       | <a href="http://www.ncbi.nlm.nih.gov/projects/gap/cgi-bin/analysis.cgi?id=pha002041">http://www.ncbi.nlm.nih.gov/projects/gap/cgi-bin/analysis.cgi?id=pha002041</a> |
| Aging | CognitiveFunction | WF1          | Winsorized visual memory composite score, multivariable adjusted             | <a href="http://www.ncbi.nlm.nih.gov/projects/gap/cgi-bin/analysis.cgi?id=pha002046">http://www.ncbi.nlm.nih.gov/projects/gap/cgi-bin/analysis.cgi?id=pha002046</a> |
| Aging | CognitiveFunction | WF2          | Winsorized visuospatial memory & organization, multivariable adjusted        | <a href="http://www.ncbi.nlm.nih.gov/projects/gap/cgi-bin/analysis.cgi?id=pha002047">http://www.ncbi.nlm.nih.gov/projects/gap/cgi-bin/analysis.cgi?id=pha002047</a> |
| Aging | CognitiveFunction | WF3          | Winsorized visual scanning & motor speed, multivariable adjusted             | <a href="http://www.ncbi.nlm.nih.gov/projects/gap/cgi-bin/analysis.cgi?id=pha002048">http://www.ncbi.nlm.nih.gov/projects/gap/cgi-bin/analysis.cgi?id=pha002048</a> |
| Aging | CognitiveFunction | WNA          | Winsorized Boston Naming Test score without cues, multivariable adjusted     | <a href="http://www.ncbi.nlm.nih.gov/projects/gap/cgi-bin/analysis.cgi?id=pha002049">http://www.ncbi.nlm.nih.gov/projects/gap/cgi-bin/analysis.cgi?id=pha002049</a> |
| Aging | CognitiveFunction | WSim         | Winsorized similarities raw score, multivariable adjusted                    | <a href="http://www.ncbi.nlm.nih.gov/projects/gap/cgi-bin/analysis.cgi?id=pha002050">http://www.ncbi.nlm.nih.gov/projects/gap/cgi-bin/analysis.cgi?id=pha002050</a> |
| Aging | CognitiveFunction | WWRAT        | Winsorized Wide Range Achievement Test                                       | <a href="http://www.ncbi.nlm.nih.gov/projects/gap/cgi-bin/analysis.cgi?id=pha002051">http://www.ncbi.nlm.nih.gov/projects/gap/cgi-bin/analysis.cgi?id=pha002051</a> |
| Aging | Hearing           | SPTA         | Pure tone audiometry average over medium frequencies, age and sex adjusted   | <a href="http://www.ncbi.nlm.nih.gov/projects/gap/cgi-bin/analysis.cgi?id=pha002052">http://www.ncbi.nlm.nih.gov/projects/gap/cgi-bin/analysis.cgi?id=pha002052</a> |
| Aging | Hearing           | SPTAHI       | Pure tone audiometry average over high frequencies, age and sex adjusted     | <a href="http://www.ncbi.nlm.nih.gov/projects/gap/cgi-bin/analysis.cgi?id=pha002053">http://www.ncbi.nlm.nih.gov/projects/gap/cgi-bin/analysis.cgi?id=pha002053</a> |
| Aging | Hearing           | SPTALO       | Pure tone audiometry average over low frequencies, age and sex adjusted      | <a href="http://www.ncbi.nlm.nih.gov/projects/gap/cgi-bin/analysis.cgi?id=pha002054">http://www.ncbi.nlm.nih.gov/projects/gap/cgi-bin/analysis.cgi?id=pha002054</a> |

Online Table 3: Phenotypes Evaluated for Linkage

| Group         | Category           | Trait Label      | Name                                                                           | Linkage Link                                                                                                                                                        |
|---------------|--------------------|------------------|--------------------------------------------------------------------------------|---------------------------------------------------------------------------------------------------------------------------------------------------------------------|
| Aging         | Hearing            | WSPTA            | Winsorized pure tone audiometry average over medium freq, age and sex adjusted | <a href="http://www.ncbi.nlm.nih.gov/projects/gap/cgi-bin/analysis.cgi?id=pha002055">http://www.ncbi.nlm.nih.gov/projects/gap/cgi-bin/analysis.cgi?id=pha002055</a> |
| Aging         | Hearing            | WSPTAHI          | Winsorized Pure tone audiometry average over high frequencies, age and sex     | <a href="http://www.ncbi.nlm.nih.gov/projects/gap/cgi-bin/analysis.cgi?id=pha002056">http://www.ncbi.nlm.nih.gov/projects/gap/cgi-bin/analysis.cgi?id=pha002056</a> |
| Aging         | Hearing            | WSPTALO          | Winsorized pure tone audiometry average over low frequencies, sex and age      | <a href="http://www.ncbi.nlm.nih.gov/projects/gap/cgi-bin/analysis.cgi?id=pha002057">http://www.ncbi.nlm.nih.gov/projects/gap/cgi-bin/analysis.cgi?id=pha002057</a> |
| Aging         | PhysicalDisability | Handgrip727X     | hand grip, offspring exam 7 & cohort exam 27                                   | <a href="http://www.ncbi.nlm.nih.gov/projects/gap/cgi-bin/analysis.cgi?id=pha002060">http://www.ncbi.nlm.nih.gov/projects/gap/cgi-bin/analysis.cgi?id=pha002060</a> |
| Aging         | PhysicalDisability | Handgrip7X       | hand grip, offspring exam 7                                                    | <a href="http://www.ncbi.nlm.nih.gov/projects/gap/cgi-bin/analysis.cgi?id=pha002061">http://www.ncbi.nlm.nih.gov/projects/gap/cgi-bin/analysis.cgi?id=pha002061</a> |
| Aging         | PhysicalDisability | Walkingspeed727X | walking speed, offspring exam 7 & cohort exam 27                               | <a href="http://www.ncbi.nlm.nih.gov/projects/gap/cgi-bin/analysis.cgi?id=pha002062">http://www.ncbi.nlm.nih.gov/projects/gap/cgi-bin/analysis.cgi?id=pha002062</a> |
| Aging         | PhysicalDisability | Walkingspeed7X   | walking speed, offspring exam 7                                                | <a href="http://www.ncbi.nlm.nih.gov/projects/gap/cgi-bin/analysis.cgi?id=pha002063">http://www.ncbi.nlm.nih.gov/projects/gap/cgi-bin/analysis.cgi?id=pha002063</a> |
| Aging         | ReproductiveTraits | MenoageMVX       | age at natural menopause, adjusted                                             | <a href="http://www.ncbi.nlm.nih.gov/projects/gap/cgi-bin/analysis.cgi?id=pha002064">http://www.ncbi.nlm.nih.gov/projects/gap/cgi-bin/analysis.cgi?id=pha002064</a> |
| Aging         | ReproductiveTraits | MenoageX         | age at natural menopause, crude                                                | <a href="http://www.ncbi.nlm.nih.gov/projects/gap/cgi-bin/analysis.cgi?id=pha002065">http://www.ncbi.nlm.nih.gov/projects/gap/cgi-bin/analysis.cgi?id=pha002065</a> |
| BloodPressure | Bloodpressure      | DBP17AVGIMPAS    | diastolic BP average age-sex-adjusted residual exams 1-7                       | <a href="http://www.ncbi.nlm.nih.gov/projects/gap/cgi-bin/analysis.cgi?id=pha002066">http://www.ncbi.nlm.nih.gov/projects/gap/cgi-bin/analysis.cgi?id=pha002066</a> |
| BloodPressure | Bloodpressure      | DBP17AVGIMPV     | diastolic BP average multivariable-adjusted residual exams 1-7                 | <a href="http://www.ncbi.nlm.nih.gov/projects/gap/cgi-bin/analysis.cgi?id=pha002067">http://www.ncbi.nlm.nih.gov/projects/gap/cgi-bin/analysis.cgi?id=pha002067</a> |
| BloodPressure | Bloodpressure      | DBP1IMPMEANAS    | diastolic BP exam 1, age- sex- adjusted                                        | <a href="http://www.ncbi.nlm.nih.gov/projects/gap/cgi-bin/analysis.cgi?id=pha002068">http://www.ncbi.nlm.nih.gov/projects/gap/cgi-bin/analysis.cgi?id=pha002068</a> |
| BloodPressure | Bloodpressure      | DBP1IMPMEANMV    | diastolic BP exam 1, multivariable-adjusted                                    | <a href="http://www.ncbi.nlm.nih.gov/projects/gap/cgi-bin/analysis.cgi?id=pha002069">http://www.ncbi.nlm.nih.gov/projects/gap/cgi-bin/analysis.cgi?id=pha002069</a> |
| BloodPressure | Bloodpressure      | DBP2IMPMEANAS    | diastolic BP exam 2, age- sex- adjusted                                        | <a href="http://www.ncbi.nlm.nih.gov/projects/gap/cgi-bin/analysis.cgi?id=pha002070">http://www.ncbi.nlm.nih.gov/projects/gap/cgi-bin/analysis.cgi?id=pha002070</a> |
| BloodPressure | Bloodpressure      | DBP2IMPMEANMV    | diastolic BP exam 2, multivariable-adjusted                                    | <a href="http://www.ncbi.nlm.nih.gov/projects/gap/cgi-bin/analysis.cgi?id=pha002071">http://www.ncbi.nlm.nih.gov/projects/gap/cgi-bin/analysis.cgi?id=pha002071</a> |
| BloodPressure | Bloodpressure      | DBP3IMPMEANAS    | diastolic BP exam 3, age- sex- adjusted                                        | <a href="http://www.ncbi.nlm.nih.gov/projects/gap/cgi-bin/analysis.cgi?id=pha002072">http://www.ncbi.nlm.nih.gov/projects/gap/cgi-bin/analysis.cgi?id=pha002072</a> |
| BloodPressure | Bloodpressure      | DBP3IMPMEANMV    | diastolic BP exam 3, multivariable-adjusted                                    | <a href="http://www.ncbi.nlm.nih.gov/projects/gap/cgi-bin/analysis.cgi?id=pha002073">http://www.ncbi.nlm.nih.gov/projects/gap/cgi-bin/analysis.cgi?id=pha002073</a> |
| BloodPressure | Bloodpressure      | DBP4IMPMEANAS    | diastolic BP exam 4, age- sex- adjusted                                        | <a href="http://www.ncbi.nlm.nih.gov/projects/gap/cgi-bin/analysis.cgi?id=pha002074">http://www.ncbi.nlm.nih.gov/projects/gap/cgi-bin/analysis.cgi?id=pha002074</a> |
| BloodPressure | Bloodpressure      | DBP4IMPMEANMV    | diastolic BP exam 4, multivariable-adjusted                                    | <a href="http://www.ncbi.nlm.nih.gov/projects/gap/cgi-bin/analysis.cgi?id=pha002075">http://www.ncbi.nlm.nih.gov/projects/gap/cgi-bin/analysis.cgi?id=pha002075</a> |
| BloodPressure | Bloodpressure      | DBP5IMPMEANAS    | diastolic BP exam 5, age- sex- adjusted                                        | <a href="http://www.ncbi.nlm.nih.gov/projects/gap/cgi-bin/analysis.cgi?id=pha002076">http://www.ncbi.nlm.nih.gov/projects/gap/cgi-bin/analysis.cgi?id=pha002076</a> |
| BloodPressure | Bloodpressure      | DBP5IMPMEANMV    | diastolic BP exam 5, multivariable-adjusted                                    | <a href="http://www.ncbi.nlm.nih.gov/projects/gap/cgi-bin/analysis.cgi?id=pha002077">http://www.ncbi.nlm.nih.gov/projects/gap/cgi-bin/analysis.cgi?id=pha002077</a> |
| BloodPressure | Bloodpressure      | DBP6IMPMEANAS    | diastolic BP exam 6, age- sex- adjusted                                        | <a href="http://www.ncbi.nlm.nih.gov/projects/gap/cgi-bin/analysis.cgi?id=pha002078">http://www.ncbi.nlm.nih.gov/projects/gap/cgi-bin/analysis.cgi?id=pha002078</a> |
| BloodPressure | Bloodpressure      | DBP6IMPMEANMV    | diastolic BP exam 6, multivariable-adjusted                                    | <a href="http://www.ncbi.nlm.nih.gov/projects/gap/cgi-bin/analysis.cgi?id=pha002079">http://www.ncbi.nlm.nih.gov/projects/gap/cgi-bin/analysis.cgi?id=pha002079</a> |
| BloodPressure | Bloodpressure      | DBP7IMPMEANAS    | diastolic BP exam 7, age- sex- adjusted                                        | <a href="http://www.ncbi.nlm.nih.gov/projects/gap/cgi-bin/analysis.cgi?id=pha002080">http://www.ncbi.nlm.nih.gov/projects/gap/cgi-bin/analysis.cgi?id=pha002080</a> |
| BloodPressure | Bloodpressure      | DBP7IMPMEANMV    | diastolic BP exam 7, multivariable-adjusted                                    | <a href="http://www.ncbi.nlm.nih.gov/projects/gap/cgi-bin/analysis.cgi?id=pha002081">http://www.ncbi.nlm.nih.gov/projects/gap/cgi-bin/analysis.cgi?id=pha002081</a> |
| BloodPressure | Bloodpressure      | PP17AVGIMPAS     | pulse pressure average age-sex-adjusted residual exams 1-7                     | <a href="http://www.ncbi.nlm.nih.gov/projects/gap/cgi-bin/analysis.cgi?id=pha002082">http://www.ncbi.nlm.nih.gov/projects/gap/cgi-bin/analysis.cgi?id=pha002082</a> |
| BloodPressure | Bloodpressure      | PP17AVGIMPV      | pulse pressure average multivariable-adjusted residual exams 1-7               | <a href="http://www.ncbi.nlm.nih.gov/projects/gap/cgi-bin/analysis.cgi?id=pha002083">http://www.ncbi.nlm.nih.gov/projects/gap/cgi-bin/analysis.cgi?id=pha002083</a> |
| BloodPressure | Bloodpressure      | PP1IMPMEANAS     | pulse pressure exam 1, age- sex- adjusted                                      | <a href="http://www.ncbi.nlm.nih.gov/projects/gap/cgi-bin/analysis.cgi?id=pha002084">http://www.ncbi.nlm.nih.gov/projects/gap/cgi-bin/analysis.cgi?id=pha002084</a> |
| BloodPressure | Bloodpressure      | PP1IMPMEANMV     | pulse pressure exam 1, multivariable- adjusted                                 | <a href="http://www.ncbi.nlm.nih.gov/projects/gap/cgi-bin/analysis.cgi?id=pha002085">http://www.ncbi.nlm.nih.gov/projects/gap/cgi-bin/analysis.cgi?id=pha002085</a> |
| BloodPressure | Bloodpressure      | PP2IMPMEANAS     | pulse pressure exam 2, age- sex- adjusted                                      | <a href="http://www.ncbi.nlm.nih.gov/projects/gap/cgi-bin/analysis.cgi?id=pha002086">http://www.ncbi.nlm.nih.gov/projects/gap/cgi-bin/analysis.cgi?id=pha002086</a> |
| BloodPressure | Bloodpressure      | PP2IMPMEANMV     | pulse pressure exam 2, multivariable- adjusted                                 | <a href="http://www.ncbi.nlm.nih.gov/projects/gap/cgi-bin/analysis.cgi?id=pha002087">http://www.ncbi.nlm.nih.gov/projects/gap/cgi-bin/analysis.cgi?id=pha002087</a> |
| BloodPressure | Bloodpressure      | PP3IMPMEANAS     | pulse pressure exam 3, age- sex- adjusted                                      | <a href="http://www.ncbi.nlm.nih.gov/projects/gap/cgi-bin/analysis.cgi?id=pha002088">http://www.ncbi.nlm.nih.gov/projects/gap/cgi-bin/analysis.cgi?id=pha002088</a> |
| BloodPressure | Bloodpressure      | PP3IMPMEANMV     | pulse pressure exam 3, multivariable- adjusted                                 | <a href="http://www.ncbi.nlm.nih.gov/projects/gap/cgi-bin/analysis.cgi?id=pha002089">http://www.ncbi.nlm.nih.gov/projects/gap/cgi-bin/analysis.cgi?id=pha002089</a> |
| BloodPressure | Bloodpressure      | PP4IMPMEANAS     | pulse pressure exam 4, age- sex- adjusted                                      | <a href="http://www.ncbi.nlm.nih.gov/projects/gap/cgi-bin/analysis.cgi?id=pha002090">http://www.ncbi.nlm.nih.gov/projects/gap/cgi-bin/analysis.cgi?id=pha002090</a> |
| BloodPressure | Bloodpressure      | PP4IMPMEANMV     | pulse pressure exam 4, multivariable- adjusted                                 | <a href="http://www.ncbi.nlm.nih.gov/projects/gap/cgi-bin/analysis.cgi?id=pha002091">http://www.ncbi.nlm.nih.gov/projects/gap/cgi-bin/analysis.cgi?id=pha002091</a> |
| BloodPressure | Bloodpressure      | PP5IMPMEANAS     | pulse pressure exam 5, age- sex- adjusted                                      | <a href="http://www.ncbi.nlm.nih.gov/projects/gap/cgi-bin/analysis.cgi?id=pha002092">http://www.ncbi.nlm.nih.gov/projects/gap/cgi-bin/analysis.cgi?id=pha002092</a> |
| BloodPressure | Bloodpressure      | PP5IMPMEANMV     | pulse pressure exam 5, multivariable- adjusted                                 | <a href="http://www.ncbi.nlm.nih.gov/projects/gap/cgi-bin/analysis.cgi?id=pha002093">http://www.ncbi.nlm.nih.gov/projects/gap/cgi-bin/analysis.cgi?id=pha002093</a> |
| BloodPressure | Bloodpressure      | PP6IMPMEANAS     | pulse pressure exam 6, age- sex- adjusted                                      | <a href="http://www.ncbi.nlm.nih.gov/projects/gap/cgi-bin/analysis.cgi?id=pha002094">http://www.ncbi.nlm.nih.gov/projects/gap/cgi-bin/analysis.cgi?id=pha002094</a> |
| BloodPressure | Bloodpressure      | PP6IMPMEANMV     | pulse pressure exam 6, multivariable- adjusted                                 | <a href="http://www.ncbi.nlm.nih.gov/projects/gap/cgi-bin/analysis.cgi?id=pha002095">http://www.ncbi.nlm.nih.gov/projects/gap/cgi-bin/analysis.cgi?id=pha002095</a> |
| BloodPressure | Bloodpressure      | PP7IMPMEANAS     | pulse pressure exam 7, age- sex- adjusted                                      | <a href="http://www.ncbi.nlm.nih.gov/projects/gap/cgi-bin/analysis.cgi?id=pha002096">http://www.ncbi.nlm.nih.gov/projects/gap/cgi-bin/analysis.cgi?id=pha002096</a> |
| BloodPressure | Bloodpressure      | PP7IMPMEANMV     | pulse pressure exam 7, multivariable- adjusted                                 | <a href="http://www.ncbi.nlm.nih.gov/projects/gap/cgi-bin/analysis.cgi?id=pha002097">http://www.ncbi.nlm.nih.gov/projects/gap/cgi-bin/analysis.cgi?id=pha002097</a> |
| BloodPressure | Bloodpressure      | SBP17AVGIMPAS    | systolic BP average age-sex-adjusted residual exams 1-7                        | <a href="http://www.ncbi.nlm.nih.gov/projects/gap/cgi-bin/analysis.cgi?id=pha002098">http://www.ncbi.nlm.nih.gov/projects/gap/cgi-bin/analysis.cgi?id=pha002098</a> |
| BloodPressure | Bloodpressure      | SBP17AVGIMPV     | systolic BP average multivariable-adjusted residual exams 1-7                  | <a href="http://www.ncbi.nlm.nih.gov/projects/gap/cgi-bin/analysis.cgi?id=pha002099">http://www.ncbi.nlm.nih.gov/projects/gap/cgi-bin/analysis.cgi?id=pha002099</a> |
| BloodPressure | Bloodpressure      | SBP1IMPMEANAS    | systolic BP exam 1, age- sex- adjusted                                         | <a href="http://www.ncbi.nlm.nih.gov/projects/gap/cgi-bin/analysis.cgi?id=pha002100">http://www.ncbi.nlm.nih.gov/projects/gap/cgi-bin/analysis.cgi?id=pha002100</a> |
| BloodPressure | Bloodpressure      | SBP1IMPMEANMV    | systolic BP exam 1, multivariable-adjusted                                     | <a href="http://www.ncbi.nlm.nih.gov/projects/gap/cgi-bin/analysis.cgi?id=pha002101">http://www.ncbi.nlm.nih.gov/projects/gap/cgi-bin/analysis.cgi?id=pha002101</a> |
| BloodPressure | Bloodpressure      | SBP2IMPMEANAS    | systolic BP exam 2, age- sex- adjusted                                         | <a href="http://www.ncbi.nlm.nih.gov/projects/gap/cgi-bin/analysis.cgi?id=pha002102">http://www.ncbi.nlm.nih.gov/projects/gap/cgi-bin/analysis.cgi?id=pha002102</a> |
| BloodPressure | Bloodpressure      | SBP2IMPMEANMV    | systolic BP exam 2, multivariable-adjusted                                     | <a href="http://www.ncbi.nlm.nih.gov/projects/gap/cgi-bin/analysis.cgi?id=pha002103">http://www.ncbi.nlm.nih.gov/projects/gap/cgi-bin/analysis.cgi?id=pha002103</a> |
| BloodPressure | Bloodpressure      | SBP3IMPMEANAS    | systolic BP exam 3, age- sex- adjusted                                         | <a href="http://www.ncbi.nlm.nih.gov/projects/gap/cgi-bin/analysis.cgi?id=pha002104">http://www.ncbi.nlm.nih.gov/projects/gap/cgi-bin/analysis.cgi?id=pha002104</a> |
| BloodPressure | Bloodpressure      | SBP3IMPMEANMV    | systolic BP exam 3, multivariable-adjusted                                     | <a href="http://www.ncbi.nlm.nih.gov/projects/gap/cgi-bin/analysis.cgi?id=pha002105">http://www.ncbi.nlm.nih.gov/projects/gap/cgi-bin/analysis.cgi?id=pha002105</a> |
| BloodPressure | Bloodpressure      | SBP4IMPMEANAS    | systolic BP exam 4, age- sex- adjusted                                         | <a href="http://www.ncbi.nlm.nih.gov/projects/gap/cgi-bin/analysis.cgi?id=pha002106">http://www.ncbi.nlm.nih.gov/projects/gap/cgi-bin/analysis.cgi?id=pha002106</a> |
| BloodPressure | Bloodpressure      | SBP4IMPMEANMV    | systolic BP exam 4, multivariable-adjusted                                     | <a href="http://www.ncbi.nlm.nih.gov/projects/gap/cgi-bin/analysis.cgi?id=pha002107">http://www.ncbi.nlm.nih.gov/projects/gap/cgi-bin/analysis.cgi?id=pha002107</a> |
| BloodPressure | Bloodpressure      | SBP5IMPMEANAS    | systolic BP exam 5, age- sex- adjusted                                         | <a href="http://www.ncbi.nlm.nih.gov/projects/gap/cgi-bin/analysis.cgi?id=pha002108">http://www.ncbi.nlm.nih.gov/projects/gap/cgi-bin/analysis.cgi?id=pha002108</a> |
| BloodPressure | Bloodpressure      | SBP5IMPMEANMV    | systolic BP exam 5, multivariable-adjusted                                     | <a href="http://www.ncbi.nlm.nih.gov/projects/gap/cgi-bin/analysis.cgi?id=pha002109">http://www.ncbi.nlm.nih.gov/projects/gap/cgi-bin/analysis.cgi?id=pha002109</a> |
| BloodPressure | Bloodpressure      | SBP6IMPMEANAS    | systolic BP exam 6, age- sex- adjusted                                         | <a href="http://www.ncbi.nlm.nih.gov/projects/gap/cgi-bin/analysis.cgi?id=pha002110">http://www.ncbi.nlm.nih.gov/projects/gap/cgi-bin/analysis.cgi?id=pha002110</a> |
| BloodPressure | Bloodpressure      | SBP6IMPMEANMV    | systolic BP exam 6, multivariable-adjusted                                     | <a href="http://www.ncbi.nlm.nih.gov/projects/gap/cgi-bin/analysis.cgi?id=pha002111">http://www.ncbi.nlm.nih.gov/projects/gap/cgi-bin/analysis.cgi?id=pha002111</a> |
| BloodPressure | Bloodpressure      | SBP7IMPMEANAS    | systolic BP exam 7, age- sex- adjusted                                         | <a href="http://www.ncbi.nlm.nih.gov/projects/gap/cgi-bin/analysis.cgi?id=pha002112">http://www.ncbi.nlm.nih.gov/projects/gap/cgi-bin/analysis.cgi?id=pha002112</a> |



Online Table 3: Phenotypes Evaluated for Linkage

| Group         | Category            | Trait Label         | Name                                                                       | Linkage Link                                                                                                                                                        |
|---------------|---------------------|---------------------|----------------------------------------------------------------------------|---------------------------------------------------------------------------------------------------------------------------------------------------------------------|
| BloodPressure | echocardiography    | LVM4MV              | M-mode Echo LV mass, exam 4, multivariable-adjusted                        | <a href="http://www.ncbi.nlm.nih.gov/projects/gap/cgi-bin/analysis.cgi?id=pha002169">http://www.ncbi.nlm.nih.gov/projects/gap/cgi-bin/analysis.cgi?id=pha002169</a> |
| BloodPressure | echocardiography    | LVM5AS              | M-mode Echo LV mass, exam 5, age-sex-adjusted                              | <a href="http://www.ncbi.nlm.nih.gov/projects/gap/cgi-bin/analysis.cgi?id=pha002170">http://www.ncbi.nlm.nih.gov/projects/gap/cgi-bin/analysis.cgi?id=pha002170</a> |
| BloodPressure | echocardiography    | LVM5MV              | M-mode Echo LV mass, exam 5, multivariable-adjusted                        | <a href="http://www.ncbi.nlm.nih.gov/projects/gap/cgi-bin/analysis.cgi?id=pha002171">http://www.ncbi.nlm.nih.gov/projects/gap/cgi-bin/analysis.cgi?id=pha002171</a> |
| BloodPressure | echocardiography    | LVM6AS              | M-mode Echo LV mass, exam 6, age-sex-adjusted                              | <a href="http://www.ncbi.nlm.nih.gov/projects/gap/cgi-bin/analysis.cgi?id=pha002172">http://www.ncbi.nlm.nih.gov/projects/gap/cgi-bin/analysis.cgi?id=pha002172</a> |
| BloodPressure | echocardiography    | LVM6MV              | M-mode Echo LV mass, exam 6, multivariable-adjusted                        | <a href="http://www.ncbi.nlm.nih.gov/projects/gap/cgi-bin/analysis.cgi?id=pha002173">http://www.ncbi.nlm.nih.gov/projects/gap/cgi-bin/analysis.cgi?id=pha002173</a> |
| BloodPressure | echocardiography    | LVWT26AVGAS         | M-mode Echo LV diastolic wall thickness, avg age-sex resid, exams 2,4,5,6  | <a href="http://www.ncbi.nlm.nih.gov/projects/gap/cgi-bin/analysis.cgi?id=pha002174">http://www.ncbi.nlm.nih.gov/projects/gap/cgi-bin/analysis.cgi?id=pha002174</a> |
| BloodPressure | echocardiography    | LVWT26AVGMV         | M-mode Echo LV diastolic wall thickness, avg multivar resid, exams 2,4,5,6 | <a href="http://www.ncbi.nlm.nih.gov/projects/gap/cgi-bin/analysis.cgi?id=pha002175">http://www.ncbi.nlm.nih.gov/projects/gap/cgi-bin/analysis.cgi?id=pha002175</a> |
| BloodPressure | echocardiography    | LVWT2AS             | M-mode Echo LV diastolic wall thickness, exam 2, age-sex-adjusted          | <a href="http://www.ncbi.nlm.nih.gov/projects/gap/cgi-bin/analysis.cgi?id=pha002176">http://www.ncbi.nlm.nih.gov/projects/gap/cgi-bin/analysis.cgi?id=pha002176</a> |
| BloodPressure | echocardiography    | LVWT2MV             | M-mode Echo LV diastolic wall thickness, exam 2, multivariable-adjusted    | <a href="http://www.ncbi.nlm.nih.gov/projects/gap/cgi-bin/analysis.cgi?id=pha002177">http://www.ncbi.nlm.nih.gov/projects/gap/cgi-bin/analysis.cgi?id=pha002177</a> |
| BloodPressure | echocardiography    | LVWT4AS             | M-mode Echo LV diastolic wall thickness, exam 4, age-sex-adjusted          | <a href="http://www.ncbi.nlm.nih.gov/projects/gap/cgi-bin/analysis.cgi?id=pha002178">http://www.ncbi.nlm.nih.gov/projects/gap/cgi-bin/analysis.cgi?id=pha002178</a> |
| BloodPressure | echocardiography    | LVWT4MV             | M-mode Echo LV diastolic wall thickness, exam 4, multivariable-adjusted    | <a href="http://www.ncbi.nlm.nih.gov/projects/gap/cgi-bin/analysis.cgi?id=pha002179">http://www.ncbi.nlm.nih.gov/projects/gap/cgi-bin/analysis.cgi?id=pha002179</a> |
| BloodPressure | echocardiography    | LVWT5AS             | M-mode Echo LV diastolic wall thickness, exam 5, age-sex-adjusted          | <a href="http://www.ncbi.nlm.nih.gov/projects/gap/cgi-bin/analysis.cgi?id=pha002180">http://www.ncbi.nlm.nih.gov/projects/gap/cgi-bin/analysis.cgi?id=pha002180</a> |
| BloodPressure | echocardiography    | LVWT5MV             | M-mode Echo LV diastolic wall thickness, exam 5, multivariable-adjusted    | <a href="http://www.ncbi.nlm.nih.gov/projects/gap/cgi-bin/analysis.cgi?id=pha002181">http://www.ncbi.nlm.nih.gov/projects/gap/cgi-bin/analysis.cgi?id=pha002181</a> |
| BloodPressure | echocardiography    | LVWT6AS             | M-mode Echo LV diastolic wall thickness, exam 6, age-sex-adjusted          | <a href="http://www.ncbi.nlm.nih.gov/projects/gap/cgi-bin/analysis.cgi?id=pha002182">http://www.ncbi.nlm.nih.gov/projects/gap/cgi-bin/analysis.cgi?id=pha002182</a> |
| BloodPressure | echocardiography    | LVWT6MV             | M-mode Echo LV diastolic wall thickness, exam 6, multivariable-adjusted    | <a href="http://www.ncbi.nlm.nih.gov/projects/gap/cgi-bin/analysis.cgi?id=pha002183">http://www.ncbi.nlm.nih.gov/projects/gap/cgi-bin/analysis.cgi?id=pha002183</a> |
| BloodPressure | Endothelialfunction | BASEFLOW7AS         | Brachial artery Baseline flow velocity, exam 7, age-sex-adjusted           | <a href="http://www.ncbi.nlm.nih.gov/projects/gap/cgi-bin/analysis.cgi?id=pha002184">http://www.ncbi.nlm.nih.gov/projects/gap/cgi-bin/analysis.cgi?id=pha002184</a> |
| BloodPressure | Endothelialfunction | BASEFLOW7MV         | Brachial artery Baseline flow velocity, exam 7, multivariable-adjusted     | <a href="http://www.ncbi.nlm.nih.gov/projects/gap/cgi-bin/analysis.cgi?id=pha002185">http://www.ncbi.nlm.nih.gov/projects/gap/cgi-bin/analysis.cgi?id=pha002185</a> |
| BloodPressure | Endothelialfunction | BASELINEDIAMETERAS7 | baseline brachial artery diameter, exam 7, age and sex-adjusted            | <a href="http://www.ncbi.nlm.nih.gov/projects/gap/cgi-bin/analysis.cgi?id=pha002186">http://www.ncbi.nlm.nih.gov/projects/gap/cgi-bin/analysis.cgi?id=pha002186</a> |
| BloodPressure | Endothelialfunction | BASELINEDIAMETERMV7 | baseline brachial artery diameter, exam 7, multivariable-adjusted          | <a href="http://www.ncbi.nlm.nih.gov/projects/gap/cgi-bin/analysis.cgi?id=pha002187">http://www.ncbi.nlm.nih.gov/projects/gap/cgi-bin/analysis.cgi?id=pha002187</a> |
| BloodPressure | Endothelialfunction | FMD7PCTAS           | Brachial artery Flow mediated dilation, exam 7, age-adjusted               | <a href="http://www.ncbi.nlm.nih.gov/projects/gap/cgi-bin/analysis.cgi?id=pha002188">http://www.ncbi.nlm.nih.gov/projects/gap/cgi-bin/analysis.cgi?id=pha002188</a> |
| BloodPressure | Endothelialfunction | FMD7PCTMV           | Brachial artery Flow mediated dilation, exam 7, multivariable-adjusted     | <a href="http://www.ncbi.nlm.nih.gov/projects/gap/cgi-bin/analysis.cgi?id=pha002189">http://www.ncbi.nlm.nih.gov/projects/gap/cgi-bin/analysis.cgi?id=pha002189</a> |
| BloodPressure | Endothelialfunction | HYPERFLOW7AS        | Brachial artery hyperemic flow velocity, exam 7, age-sex-adjusted          | <a href="http://www.ncbi.nlm.nih.gov/projects/gap/cgi-bin/analysis.cgi?id=pha002190">http://www.ncbi.nlm.nih.gov/projects/gap/cgi-bin/analysis.cgi?id=pha002190</a> |
| BloodPressure | Endothelialfunction | HYPERFLOW7MV        | Brachial artery hyperemic flow velocity, exam 7, multivariable-adjusted    | <a href="http://www.ncbi.nlm.nih.gov/projects/gap/cgi-bin/analysis.cgi?id=pha002191">http://www.ncbi.nlm.nih.gov/projects/gap/cgi-bin/analysis.cgi?id=pha002191</a> |
| BloodPressure | ExerciseTest        | ETT2DBPREC3AS       | Exercise recovery 3-min diastolic BP, exam 2, age-sex-adjusted             | <a href="http://www.ncbi.nlm.nih.gov/projects/gap/cgi-bin/analysis.cgi?id=pha002192">http://www.ncbi.nlm.nih.gov/projects/gap/cgi-bin/analysis.cgi?id=pha002192</a> |
| BloodPressure | ExerciseTest        | ETT2DBPREC3MV       | Exercise recovery 3-min diastolic BP, exam 2, multivariable-adjusted       | <a href="http://www.ncbi.nlm.nih.gov/projects/gap/cgi-bin/analysis.cgi?id=pha002193">http://www.ncbi.nlm.nih.gov/projects/gap/cgi-bin/analysis.cgi?id=pha002193</a> |
| BloodPressure | ExerciseTest        | ETT2DBPSTG2AS       | Exercise Stage 2 diastolic BP, exam 2, age-sex-adjusted                    | <a href="http://www.ncbi.nlm.nih.gov/projects/gap/cgi-bin/analysis.cgi?id=pha002194">http://www.ncbi.nlm.nih.gov/projects/gap/cgi-bin/analysis.cgi?id=pha002194</a> |
| BloodPressure | ExerciseTest        | ETT2DBPSTG2MV       | Exercise Stage 2 diastolic BP, exam 2, multivariable-adjusted              | <a href="http://www.ncbi.nlm.nih.gov/projects/gap/cgi-bin/analysis.cgi?id=pha002195">http://www.ncbi.nlm.nih.gov/projects/gap/cgi-bin/analysis.cgi?id=pha002195</a> |
| BloodPressure | ExerciseTest        | ETT2HRREC3AS        | Exercise recovery 3-min heart rate, exam 2, age-sex-adjusted               | <a href="http://www.ncbi.nlm.nih.gov/projects/gap/cgi-bin/analysis.cgi?id=pha002196">http://www.ncbi.nlm.nih.gov/projects/gap/cgi-bin/analysis.cgi?id=pha002196</a> |
| BloodPressure | ExerciseTest        | ETT2HRREC3MV        | Exercise recovery 3-min heart rate, exam 2, multivariable-adjusted         | <a href="http://www.ncbi.nlm.nih.gov/projects/gap/cgi-bin/analysis.cgi?id=pha002197">http://www.ncbi.nlm.nih.gov/projects/gap/cgi-bin/analysis.cgi?id=pha002197</a> |
| BloodPressure | ExerciseTest        | ETT2HRSTG2AS        | Exercise Stage 2 heart rate, exam 2, age-sex-adjusted                      | <a href="http://www.ncbi.nlm.nih.gov/projects/gap/cgi-bin/analysis.cgi?id=pha002198">http://www.ncbi.nlm.nih.gov/projects/gap/cgi-bin/analysis.cgi?id=pha002198</a> |
| BloodPressure | ExerciseTest        | ETT2HRSTG2MV        | Exercise Stage 2 heart rate, exam 2, multivariable-adjusted                | <a href="http://www.ncbi.nlm.nih.gov/projects/gap/cgi-bin/analysis.cgi?id=pha002199">http://www.ncbi.nlm.nih.gov/projects/gap/cgi-bin/analysis.cgi?id=pha002199</a> |
| BloodPressure | ExerciseTest        | ETT2SBPREC3AS       | Exercise recovery 3-min systolic BP, exam 2, age-sex-adjusted              | <a href="http://www.ncbi.nlm.nih.gov/projects/gap/cgi-bin/analysis.cgi?id=pha002200">http://www.ncbi.nlm.nih.gov/projects/gap/cgi-bin/analysis.cgi?id=pha002200</a> |
| BloodPressure | ExerciseTest        | ETT2SBPREC3MV       | Exercise recovery 3-min systolic BP, exam 2, multivariable-adjusted        | <a href="http://www.ncbi.nlm.nih.gov/projects/gap/cgi-bin/analysis.cgi?id=pha002201">http://www.ncbi.nlm.nih.gov/projects/gap/cgi-bin/analysis.cgi?id=pha002201</a> |
| BloodPressure | ExerciseTest        | ETT2SBPSTG2AS       | Exercise Stage 2 systolic BP, exam 2, age-sex-adjusted                     | <a href="http://www.ncbi.nlm.nih.gov/projects/gap/cgi-bin/analysis.cgi?id=pha002202">http://www.ncbi.nlm.nih.gov/projects/gap/cgi-bin/analysis.cgi?id=pha002202</a> |
| BloodPressure | ExerciseTest        | ETT2SBPSTG2MV       | Exercise Stage 2 systolic BP, exam 2, multivariable-adjusted               | <a href="http://www.ncbi.nlm.nih.gov/projects/gap/cgi-bin/analysis.cgi?id=pha002203">http://www.ncbi.nlm.nih.gov/projects/gap/cgi-bin/analysis.cgi?id=pha002203</a> |
| BloodPressure | tonometry           | AI7AS               | augmentation index, exam 7, age-sex-adjusted                               | <a href="http://www.ncbi.nlm.nih.gov/projects/gap/cgi-bin/analysis.cgi?id=pha002204">http://www.ncbi.nlm.nih.gov/projects/gap/cgi-bin/analysis.cgi?id=pha002204</a> |
| BloodPressure | tonometry           | AI7MV               | augmentation index, exam 7, multivariable-adjusted                         | <a href="http://www.ncbi.nlm.nih.gov/projects/gap/cgi-bin/analysis.cgi?id=pha002205">http://www.ncbi.nlm.nih.gov/projects/gap/cgi-bin/analysis.cgi?id=pha002205</a> |
| BloodPressure | tonometry           | CBPWV7AS            | carotid-brachial pulse wave velocity, exam 7, age-sex-adjusted             | <a href="http://www.ncbi.nlm.nih.gov/projects/gap/cgi-bin/analysis.cgi?id=pha002206">http://www.ncbi.nlm.nih.gov/projects/gap/cgi-bin/analysis.cgi?id=pha002206</a> |
| BloodPressure | tonometry           | CBPWV7MV            | carotid-brachial pulse wave velocity, exam 7, multivariable-adjusted       | <a href="http://www.ncbi.nlm.nih.gov/projects/gap/cgi-bin/analysis.cgi?id=pha002207">http://www.ncbi.nlm.nih.gov/projects/gap/cgi-bin/analysis.cgi?id=pha002207</a> |
| BloodPressure | tonometry           | CFPWV7AS            | carotid-femoral pulse wave velocity, exam 7, age-sex-adjusted              | <a href="http://www.ncbi.nlm.nih.gov/projects/gap/cgi-bin/analysis.cgi?id=pha002208">http://www.ncbi.nlm.nih.gov/projects/gap/cgi-bin/analysis.cgi?id=pha002208</a> |
| BloodPressure | tonometry           | CFPWV7MV            | carotid-femoral pulse wave velocity, exam 7, multivariable-adjusted        | <a href="http://www.ncbi.nlm.nih.gov/projects/gap/cgi-bin/analysis.cgi?id=pha002209">http://www.ncbi.nlm.nih.gov/projects/gap/cgi-bin/analysis.cgi?id=pha002209</a> |
| BloodPressure | tonometry           | CPP7AS              | central pulse pressure, exam 7, age-sex-adjusted                           | <a href="http://www.ncbi.nlm.nih.gov/projects/gap/cgi-bin/analysis.cgi?id=pha002210">http://www.ncbi.nlm.nih.gov/projects/gap/cgi-bin/analysis.cgi?id=pha002210</a> |
| BloodPressure | tonometry           | CPP7MV              | central pulse pressure, exam 7, multivariable-adjusted                     | <a href="http://www.ncbi.nlm.nih.gov/projects/gap/cgi-bin/analysis.cgi?id=pha002211">http://www.ncbi.nlm.nih.gov/projects/gap/cgi-bin/analysis.cgi?id=pha002211</a> |
| BloodPressure | tonometry           | CRPWV7MV            | carotid-radial pulse wave velocity, exam 7, multivariable-adjusted         | <a href="http://www.ncbi.nlm.nih.gov/projects/gap/cgi-bin/analysis.cgi?id=pha002212">http://www.ncbi.nlm.nih.gov/projects/gap/cgi-bin/analysis.cgi?id=pha002212</a> |
| BloodPressure | tonometry           | DBP7BRAOSCAS        | Diastolic BP Brachial oscillometric, exam 7, age-sex-adjusted              | <a href="http://www.ncbi.nlm.nih.gov/projects/gap/cgi-bin/analysis.cgi?id=pha002213">http://www.ncbi.nlm.nih.gov/projects/gap/cgi-bin/analysis.cgi?id=pha002213</a> |
| BloodPressure | tonometry           | DBP7BRAOSCMV        | Diastolic BP Brachial oscillometric, exam 7, multivariable-adjusted        | <a href="http://www.ncbi.nlm.nih.gov/projects/gap/cgi-bin/analysis.cgi?id=pha002214">http://www.ncbi.nlm.nih.gov/projects/gap/cgi-bin/analysis.cgi?id=pha002214</a> |
| BloodPressure | tonometry           | FWDWAVE7AS          | forward wave amplitude, exam 7, age-sex-adjusted                           | <a href="http://www.ncbi.nlm.nih.gov/projects/gap/cgi-bin/analysis.cgi?id=pha002215">http://www.ncbi.nlm.nih.gov/projects/gap/cgi-bin/analysis.cgi?id=pha002215</a> |
| BloodPressure | tonometry           | FWDWAVE7MV          | forward wave amplitude, exam 7, multivariable-adjusted                     | <a href="http://www.ncbi.nlm.nih.gov/projects/gap/cgi-bin/analysis.cgi?id=pha002216">http://www.ncbi.nlm.nih.gov/projects/gap/cgi-bin/analysis.cgi?id=pha002216</a> |
| BloodPressure | tonometry           | INVCFPWV7AS         | LV ejection time, exam 7, age-sex-adjusted                                 | <a href="http://www.ncbi.nlm.nih.gov/projects/gap/cgi-bin/analysis.cgi?id=pha002217">http://www.ncbi.nlm.nih.gov/projects/gap/cgi-bin/analysis.cgi?id=pha002217</a> |
| BloodPressure | tonometry           | INVCFPWV7MV         | LV ejection time, exam 7, multivariable-adjusted                           | <a href="http://www.ncbi.nlm.nih.gov/projects/gap/cgi-bin/analysis.cgi?id=pha002218">http://www.ncbi.nlm.nih.gov/projects/gap/cgi-bin/analysis.cgi?id=pha002218</a> |
| BloodPressure | tonometry           | MAP7AS              | mean arterial pressure, exam 7, age-sex-adjusted                           | <a href="http://www.ncbi.nlm.nih.gov/projects/gap/cgi-bin/analysis.cgi?id=pha002219">http://www.ncbi.nlm.nih.gov/projects/gap/cgi-bin/analysis.cgi?id=pha002219</a> |
| BloodPressure | tonometry           | MAP7MV              | mean arterial pressure, exam 7, multivariable-adjusted                     | <a href="http://www.ncbi.nlm.nih.gov/projects/gap/cgi-bin/analysis.cgi?id=pha002220">http://www.ncbi.nlm.nih.gov/projects/gap/cgi-bin/analysis.cgi?id=pha002220</a> |
| BloodPressure | tonometry           | PERAMPAP7AS         | Peripheral amplification apparent, exam 7, age-sex-adjusted                | <a href="http://www.ncbi.nlm.nih.gov/projects/gap/cgi-bin/analysis.cgi?id=pha002221">http://www.ncbi.nlm.nih.gov/projects/gap/cgi-bin/analysis.cgi?id=pha002221</a> |
| BloodPressure | tonometry           | PERAMPAP7MV         | Peripheral amplification apparent, exam 7, multivariable-adjusted          | <a href="http://www.ncbi.nlm.nih.gov/projects/gap/cgi-bin/analysis.cgi?id=pha002222">http://www.ncbi.nlm.nih.gov/projects/gap/cgi-bin/analysis.cgi?id=pha002222</a> |
| BloodPressure | tonometry           | PERAMPTRU7AS        | Peripheral amplification true, exam 7, age-sex-adjusted                    | <a href="http://www.ncbi.nlm.nih.gov/projects/gap/cgi-bin/analysis.cgi?id=pha002223">http://www.ncbi.nlm.nih.gov/projects/gap/cgi-bin/analysis.cgi?id=pha002223</a> |
| BloodPressure | tonometry           | PERAMPTRU7MV        | Peripheral amplification true, exam 7, multivariable-adjusted              | <a href="http://www.ncbi.nlm.nih.gov/projects/gap/cgi-bin/analysis.cgi?id=pha002224">http://www.ncbi.nlm.nih.gov/projects/gap/cgi-bin/analysis.cgi?id=pha002224</a> |

Online Table 3: Phenotypes Evaluated for Linkage

| Group         | Category            | Trait Label    | Name                                                                        | Linkage Link                                                                                                                                                        |
|---------------|---------------------|----------------|-----------------------------------------------------------------------------|---------------------------------------------------------------------------------------------------------------------------------------------------------------------|
| BloodPressure | tonometry           | PP7BRAOSCAS    | Pulse pressure Brachial oscillometric, exam 7, age-sex-adjusted             | <a href="http://www.ncbi.nlm.nih.gov/projects/gap/cgi-bin/analysis.cgi?id=pha002225">http://www.ncbi.nlm.nih.gov/projects/gap/cgi-bin/analysis.cgi?id=pha002225</a> |
| BloodPressure | tonometry           | PP7BRAOSCMV    | Pulse pressure Brachial oscillometric, exam 7, multivariable-adjusted       | <a href="http://www.ncbi.nlm.nih.gov/projects/gap/cgi-bin/analysis.cgi?id=pha002226">http://www.ncbi.nlm.nih.gov/projects/gap/cgi-bin/analysis.cgi?id=pha002226</a> |
| BloodPressure | tonometry           | REFWAVE7AS     | reflected wave amplitude, exam 7, age-sex-adjusted                          | <a href="http://www.ncbi.nlm.nih.gov/projects/gap/cgi-bin/analysis.cgi?id=pha002227">http://www.ncbi.nlm.nih.gov/projects/gap/cgi-bin/analysis.cgi?id=pha002227</a> |
| BloodPressure | tonometry           | REFWAVE7MV     | reflected wave amplitude, exam 7, multivariable-adjusted                    | <a href="http://www.ncbi.nlm.nih.gov/projects/gap/cgi-bin/analysis.cgi?id=pha002228">http://www.ncbi.nlm.nih.gov/projects/gap/cgi-bin/analysis.cgi?id=pha002228</a> |
| BloodPressure | tonometry           | RWTT7AS        | reflected wave transit time, exam 7, age-sex-adjusted                       | <a href="http://www.ncbi.nlm.nih.gov/projects/gap/cgi-bin/analysis.cgi?id=pha002229">http://www.ncbi.nlm.nih.gov/projects/gap/cgi-bin/analysis.cgi?id=pha002229</a> |
| BloodPressure | tonometry           | RWTT7MV        | reflected wave transit time, exam 7, multivariable-adjusted                 | <a href="http://www.ncbi.nlm.nih.gov/projects/gap/cgi-bin/analysis.cgi?id=pha002230">http://www.ncbi.nlm.nih.gov/projects/gap/cgi-bin/analysis.cgi?id=pha002230</a> |
| BloodPressure | tonometry           | SBP7BRAOSCAS   | Systolic BP Brachial oscillometric, exam 7, age-sex-adjusted                | <a href="http://www.ncbi.nlm.nih.gov/projects/gap/cgi-bin/analysis.cgi?id=pha002231">http://www.ncbi.nlm.nih.gov/projects/gap/cgi-bin/analysis.cgi?id=pha002231</a> |
| BloodPressure | tonometry           | SBP7BRAOSCMV   | Systolic BP Brachial oscillometric, exam 7, multivariable-adjusted          | <a href="http://www.ncbi.nlm.nih.gov/projects/gap/cgi-bin/analysis.cgi?id=pha002232">http://www.ncbi.nlm.nih.gov/projects/gap/cgi-bin/analysis.cgi?id=pha002232</a> |
| CVDMiscTraits | ECGtraits           | PRAadjRRPOOL   | Age & RR adjusted PR interval cohort ex 11 offspring ex 1                   | <a href="http://www.ncbi.nlm.nih.gov/projects/gap/cgi-bin/analysis.cgi?id=pha002701">http://www.ncbi.nlm.nih.gov/projects/gap/cgi-bin/analysis.cgi?id=pha002701</a> |
| CVDMiscTraits | ECGtraits           | QTMEN          | Age & RR adjusted QT interval men cohort ex 11 offspring ex 1               | <a href="http://www.ncbi.nlm.nih.gov/projects/gap/cgi-bin/analysis.cgi?id=pha002702">http://www.ncbi.nlm.nih.gov/projects/gap/cgi-bin/analysis.cgi?id=pha002702</a> |
| CVDMiscTraits | ECGtraits           | QTPOOL         | Age & RR adjusted QT interval men & women cohort ex 11 offspring ex 1       | <a href="http://www.ncbi.nlm.nih.gov/projects/gap/cgi-bin/analysis.cgi?id=pha002703">http://www.ncbi.nlm.nih.gov/projects/gap/cgi-bin/analysis.cgi?id=pha002703</a> |
| CVDMiscTraits | ECGtraits           | QTWOMEN        | Age & RR adjusted QT interval women cohort ex 11 offspring ex 1             | <a href="http://www.ncbi.nlm.nih.gov/projects/gap/cgi-bin/analysis.cgi?id=pha002704">http://www.ncbi.nlm.nih.gov/projects/gap/cgi-bin/analysis.cgi?id=pha002704</a> |
| CVDMiscTraits | ECGtraits           | RRMEN          | Age adjusted RR interval men cohort ex 11 offspring ex 1                    | <a href="http://www.ncbi.nlm.nih.gov/projects/gap/cgi-bin/analysis.cgi?id=pha002705">http://www.ncbi.nlm.nih.gov/projects/gap/cgi-bin/analysis.cgi?id=pha002705</a> |
| CVDMiscTraits | ECGtraits           | RRPOOL         | Age adjusted RR interval men & women cohort ex 11 offspring ex 1            | <a href="http://www.ncbi.nlm.nih.gov/projects/gap/cgi-bin/analysis.cgi?id=pha002706">http://www.ncbi.nlm.nih.gov/projects/gap/cgi-bin/analysis.cgi?id=pha002706</a> |
| CVDMiscTraits | ECGtraits           | RRWOMEN        | Age adjusted RR interval women cohort ex 11 offspring ex 1                  | <a href="http://www.ncbi.nlm.nih.gov/projects/gap/cgi-bin/analysis.cgi?id=pha002707">http://www.ncbi.nlm.nih.gov/projects/gap/cgi-bin/analysis.cgi?id=pha002707</a> |
| CVDMiscTraits | HRVtraits           | LFHFHRV        | Age & HR adjusted low:high freq power HRV exams 18 (cohort), 3 (offspring)  | <a href="http://www.ncbi.nlm.nih.gov/projects/gap/cgi-bin/analysis.cgi?id=pha002708">http://www.ncbi.nlm.nih.gov/projects/gap/cgi-bin/analysis.cgi?id=pha002708</a> |
| CVDMiscTraits | HRVtraits           | SDNNHRV        | Age & HR adjusted SDNN HRV exams 18 (cohort), 3 (offspring)                 | <a href="http://www.ncbi.nlm.nih.gov/projects/gap/cgi-bin/analysis.cgi?id=pha002709">http://www.ncbi.nlm.nih.gov/projects/gap/cgi-bin/analysis.cgi?id=pha002709</a> |
| CVDMiscTraits | HRVtraits           | TOTPNWRHRV     | Age & HR adjusted total power HRV exams 18 (cohort), 3 (offspring)          | <a href="http://www.ncbi.nlm.nih.gov/projects/gap/cgi-bin/analysis.cgi?id=pha002710">http://www.ncbi.nlm.nih.gov/projects/gap/cgi-bin/analysis.cgi?id=pha002710</a> |
| CVDMiscTraits | Otherclinicaltraits | ALCOHOL1       | Age- & sex-adjusted drinks/day ex 1                                         | <a href="http://www.ncbi.nlm.nih.gov/projects/gap/cgi-bin/analysis.cgi?id=pha002711">http://www.ncbi.nlm.nih.gov/projects/gap/cgi-bin/analysis.cgi?id=pha002711</a> |
| CVDMiscTraits | Otherclinicaltraits | ALCOHOL2       | Age- & sex-adjusted drinks/day across all exams                             | <a href="http://www.ncbi.nlm.nih.gov/projects/gap/cgi-bin/analysis.cgi?id=pha002712">http://www.ncbi.nlm.nih.gov/projects/gap/cgi-bin/analysis.cgi?id=pha002712</a> |
| CVDMiscTraits | Otherclinicaltraits | ALCOHOL3       | Age- & sex-adjusted gallbladder disease                                     | <a href="http://www.ncbi.nlm.nih.gov/projects/gap/cgi-bin/analysis.cgi?id=pha002713">http://www.ncbi.nlm.nih.gov/projects/gap/cgi-bin/analysis.cgi?id=pha002713</a> |
| ITBiomarkers  | Hematological       | Hctavg12asWIN  | Hematocrit, average exam 1 & 2, age & sex, Winsorized                       | <a href="http://www.ncbi.nlm.nih.gov/projects/gap/cgi-bin/analysis.cgi?id=pha002233">http://www.ncbi.nlm.nih.gov/projects/gap/cgi-bin/analysis.cgi?id=pha002233</a> |
| ITBiomarkers  | Hematological       | Hctavg12mvWIN  | Hematocrit, averaged residuals of exam 1 & 2, multivariable, Winsorized     | <a href="http://www.ncbi.nlm.nih.gov/projects/gap/cgi-bin/analysis.cgi?id=pha002234">http://www.ncbi.nlm.nih.gov/projects/gap/cgi-bin/analysis.cgi?id=pha002234</a> |
| ITBiomarkers  | Hematological       | Hctex1asWIN    | Hematocrit exam 1 age & sex, Winsorized                                     | <a href="http://www.ncbi.nlm.nih.gov/projects/gap/cgi-bin/analysis.cgi?id=pha002235">http://www.ncbi.nlm.nih.gov/projects/gap/cgi-bin/analysis.cgi?id=pha002235</a> |
| ITBiomarkers  | Hematological       | Hctex1mvWIN    | Hematocrit exam 1 multivariable, Winsorized                                 | <a href="http://www.ncbi.nlm.nih.gov/projects/gap/cgi-bin/analysis.cgi?id=pha002236">http://www.ncbi.nlm.nih.gov/projects/gap/cgi-bin/analysis.cgi?id=pha002236</a> |
| ITBiomarkers  | Hematological       | Hctex2asWIN    | Hematocrit exam 2 age & sex, Winsorized                                     | <a href="http://www.ncbi.nlm.nih.gov/projects/gap/cgi-bin/analysis.cgi?id=pha002237">http://www.ncbi.nlm.nih.gov/projects/gap/cgi-bin/analysis.cgi?id=pha002237</a> |
| ITBiomarkers  | Hematological       | Hctex2mvWIN    | Hematocrit exam 2 multivariable, Winsorized                                 | <a href="http://www.ncbi.nlm.nih.gov/projects/gap/cgi-bin/analysis.cgi?id=pha002238">http://www.ncbi.nlm.nih.gov/projects/gap/cgi-bin/analysis.cgi?id=pha002238</a> |
| ITBiomarkers  | Hematological       | Hgbavg12asWIN  | Hemoglobin averaged residuals of exam 1 & 2, age & sex, Winsorized          | <a href="http://www.ncbi.nlm.nih.gov/projects/gap/cgi-bin/analysis.cgi?id=pha002239">http://www.ncbi.nlm.nih.gov/projects/gap/cgi-bin/analysis.cgi?id=pha002239</a> |
| ITBiomarkers  | Hematological       | Hgbavg12mvWIN  | Hemoglobin, averaged residuals of exam 1 & 2, multivariable, Winsorized     | <a href="http://www.ncbi.nlm.nih.gov/projects/gap/cgi-bin/analysis.cgi?id=pha002240">http://www.ncbi.nlm.nih.gov/projects/gap/cgi-bin/analysis.cgi?id=pha002240</a> |
| ITBiomarkers  | Hematological       | Hgbex1asWIN    | Hemoglobin exam 1 age & sex, Winsorized                                     | <a href="http://www.ncbi.nlm.nih.gov/projects/gap/cgi-bin/analysis.cgi?id=pha002241">http://www.ncbi.nlm.nih.gov/projects/gap/cgi-bin/analysis.cgi?id=pha002241</a> |
| ITBiomarkers  | Hematological       | Hgbex1mvWIN    | Hemoglobin exam 1 multivariable, Winsorized                                 | <a href="http://www.ncbi.nlm.nih.gov/projects/gap/cgi-bin/analysis.cgi?id=pha002242">http://www.ncbi.nlm.nih.gov/projects/gap/cgi-bin/analysis.cgi?id=pha002242</a> |
| ITBiomarkers  | Hematological       | Hgbex2asWIN    | Hemoglobin exam 2 age & sex, Winsorized                                     | <a href="http://www.ncbi.nlm.nih.gov/projects/gap/cgi-bin/analysis.cgi?id=pha002243">http://www.ncbi.nlm.nih.gov/projects/gap/cgi-bin/analysis.cgi?id=pha002243</a> |
| ITBiomarkers  | Hematological       | Hgbex2mvWIN    | Hemoglobin exam 2 multivariable, Winsorized                                 | <a href="http://www.ncbi.nlm.nih.gov/projects/gap/cgi-bin/analysis.cgi?id=pha002244">http://www.ncbi.nlm.nih.gov/projects/gap/cgi-bin/analysis.cgi?id=pha002244</a> |
| ITBiomarkers  | Hematological       | MCHCavg12as    | Mean corpuscular hemoglobin concentration avg. residuals exam 1&2 age & sex | <a href="http://www.ncbi.nlm.nih.gov/projects/gap/cgi-bin/analysis.cgi?id=pha002245">http://www.ncbi.nlm.nih.gov/projects/gap/cgi-bin/analysis.cgi?id=pha002245</a> |
| ITBiomarkers  | Hematological       | MCHCavg12mv    | Mean corpuscular hemoglobin concentration avg. residuals of exam 1&2 MV     | <a href="http://www.ncbi.nlm.nih.gov/projects/gap/cgi-bin/analysis.cgi?id=pha002246">http://www.ncbi.nlm.nih.gov/projects/gap/cgi-bin/analysis.cgi?id=pha002246</a> |
| ITBiomarkers  | Hematological       | MCHCex1asWIN   | Mean corpuscular hemoglobin concentration exam 1 age & sex, Winsorized      | <a href="http://www.ncbi.nlm.nih.gov/projects/gap/cgi-bin/analysis.cgi?id=pha002247">http://www.ncbi.nlm.nih.gov/projects/gap/cgi-bin/analysis.cgi?id=pha002247</a> |
| ITBiomarkers  | Hematological       | MCHCex1mvWIN   | Mean corpuscular hemoglobin concentration exam 1 multivariable, Winsorized  | <a href="http://www.ncbi.nlm.nih.gov/projects/gap/cgi-bin/analysis.cgi?id=pha002248">http://www.ncbi.nlm.nih.gov/projects/gap/cgi-bin/analysis.cgi?id=pha002248</a> |
| ITBiomarkers  | Hematological       | MCHCex2as      | Mean corpuscular hemoglobin concentration exam 2 age & sex                  | <a href="http://www.ncbi.nlm.nih.gov/projects/gap/cgi-bin/analysis.cgi?id=pha002249">http://www.ncbi.nlm.nih.gov/projects/gap/cgi-bin/analysis.cgi?id=pha002249</a> |
| ITBiomarkers  | Hematological       | MCHCex2mv      | Mean corpuscular hemoglobin concentration exam 2 multivariable              | <a href="http://www.ncbi.nlm.nih.gov/projects/gap/cgi-bin/analysis.cgi?id=pha002250">http://www.ncbi.nlm.nih.gov/projects/gap/cgi-bin/analysis.cgi?id=pha002250</a> |
| ITBiomarkers  | Hematological       | MCVavg12asNL   | Mean corpuscular volume avg. residuals exam 1&2, age & sex, normalized dev. | <a href="http://www.ncbi.nlm.nih.gov/projects/gap/cgi-bin/analysis.cgi?id=pha002251">http://www.ncbi.nlm.nih.gov/projects/gap/cgi-bin/analysis.cgi?id=pha002251</a> |
| ITBiomarkers  | Hematological       | MCVavg12mvNL   | Mean corpuscular volume avg. residuals exam 1&2, multiv., normalized dev.   | <a href="http://www.ncbi.nlm.nih.gov/projects/gap/cgi-bin/analysis.cgi?id=pha002252">http://www.ncbi.nlm.nih.gov/projects/gap/cgi-bin/analysis.cgi?id=pha002252</a> |
| ITBiomarkers  | Hematological       | MCVex1asNL     | Mean corpuscular volume exam 1 age & sex, normalized deviates               | <a href="http://www.ncbi.nlm.nih.gov/projects/gap/cgi-bin/analysis.cgi?id=pha002253">http://www.ncbi.nlm.nih.gov/projects/gap/cgi-bin/analysis.cgi?id=pha002253</a> |
| ITBiomarkers  | Hematological       | MCVex1mvNL     | Mean corpuscular volume multivariable, normalized deviates                  | <a href="http://www.ncbi.nlm.nih.gov/projects/gap/cgi-bin/analysis.cgi?id=pha002254">http://www.ncbi.nlm.nih.gov/projects/gap/cgi-bin/analysis.cgi?id=pha002254</a> |
| ITBiomarkers  | Hematological       | MCVex2asNL     | Mean corpuscular volume exam 2 age & sex, normalized deviates               | <a href="http://www.ncbi.nlm.nih.gov/projects/gap/cgi-bin/analysis.cgi?id=pha002255">http://www.ncbi.nlm.nih.gov/projects/gap/cgi-bin/analysis.cgi?id=pha002255</a> |
| ITBiomarkers  | Hematological       | MCVex2mvNL     | Mean corpuscular volume multivariable exam 2, normalized deviates           | <a href="http://www.ncbi.nlm.nih.gov/projects/gap/cgi-bin/analysis.cgi?id=pha002256">http://www.ncbi.nlm.nih.gov/projects/gap/cgi-bin/analysis.cgi?id=pha002256</a> |
| ITBiomarkers  | Hematological       | RBCCavg12asWIN | Red blood cell count averaged residuals exam 1 & 2, age & sex, Winsorized   | <a href="http://www.ncbi.nlm.nih.gov/projects/gap/cgi-bin/analysis.cgi?id=pha002257">http://www.ncbi.nlm.nih.gov/projects/gap/cgi-bin/analysis.cgi?id=pha002257</a> |
| ITBiomarkers  | Hematological       | RBCCavg12mvWIN | Red blood cell count avg. residuals exam 1 & 2, multivariable, Winsorized   | <a href="http://www.ncbi.nlm.nih.gov/projects/gap/cgi-bin/analysis.cgi?id=pha002258">http://www.ncbi.nlm.nih.gov/projects/gap/cgi-bin/analysis.cgi?id=pha002258</a> |
| ITBiomarkers  | Hematological       | RBCCex1asWIN   | Red blood cell count exam 1 age & sex, Winsorized                           | <a href="http://www.ncbi.nlm.nih.gov/projects/gap/cgi-bin/analysis.cgi?id=pha002259">http://www.ncbi.nlm.nih.gov/projects/gap/cgi-bin/analysis.cgi?id=pha002259</a> |
| ITBiomarkers  | Hematological       | RBCCex1mvWIN   | Red blood cell count exam 1 multivariable, Winsorized                       | <a href="http://www.ncbi.nlm.nih.gov/projects/gap/cgi-bin/analysis.cgi?id=pha002260">http://www.ncbi.nlm.nih.gov/projects/gap/cgi-bin/analysis.cgi?id=pha002260</a> |
| ITBiomarkers  | Hematological       | RBCCex2as      | Red blood cell count exam 2 age & sex                                       | <a href="http://www.ncbi.nlm.nih.gov/projects/gap/cgi-bin/analysis.cgi?id=pha002261">http://www.ncbi.nlm.nih.gov/projects/gap/cgi-bin/analysis.cgi?id=pha002261</a> |
| ITBiomarkers  | Hematological       | RBCCex2asWIN   | Red blood cell count exam 2 age & sex, Winsorized                           | <a href="http://www.ncbi.nlm.nih.gov/projects/gap/cgi-bin/analysis.cgi?id=pha002262">http://www.ncbi.nlm.nih.gov/projects/gap/cgi-bin/analysis.cgi?id=pha002262</a> |
| ITBiomarkers  | Hematological       | RBCCex2mv      | Red blood cell count exam 2 multivariable                                   | <a href="http://www.ncbi.nlm.nih.gov/projects/gap/cgi-bin/analysis.cgi?id=pha002263">http://www.ncbi.nlm.nih.gov/projects/gap/cgi-bin/analysis.cgi?id=pha002263</a> |
| ITBiomarkers  | Hematological       | RBCCex2mvWIN   | Red blood cell count exam 2 multivariable, Winsorized                       | <a href="http://www.ncbi.nlm.nih.gov/projects/gap/cgi-bin/analysis.cgi?id=pha002264">http://www.ncbi.nlm.nih.gov/projects/gap/cgi-bin/analysis.cgi?id=pha002264</a> |
| ITBiomarkers  | Hematological       | WBCavg12as     | White blood cell count averaged residuals of exam 1 & 2, age & sex          | <a href="http://www.ncbi.nlm.nih.gov/projects/gap/cgi-bin/analysis.cgi?id=pha002265">http://www.ncbi.nlm.nih.gov/projects/gap/cgi-bin/analysis.cgi?id=pha002265</a> |
| ITBiomarkers  | Hematological       | WBCavg12mv     | White blood cell count, averaged residuals of exam 1 & 2, multivariable     | <a href="http://www.ncbi.nlm.nih.gov/projects/gap/cgi-bin/analysis.cgi?id=pha002266">http://www.ncbi.nlm.nih.gov/projects/gap/cgi-bin/analysis.cgi?id=pha002266</a> |
| ITBiomarkers  | Hematological       | WBCex1as       | White blood cell count exam 1 age & sex, log transformed                    | <a href="http://www.ncbi.nlm.nih.gov/projects/gap/cgi-bin/analysis.cgi?id=pha002267">http://www.ncbi.nlm.nih.gov/projects/gap/cgi-bin/analysis.cgi?id=pha002267</a> |

Online Table 3: Phenotypes Evaluated for Linkage

| Group        | Category      | Trait Label          | Name                                                                        | Linkage Link                                                                                                                                                        |
|--------------|---------------|----------------------|-----------------------------------------------------------------------------|---------------------------------------------------------------------------------------------------------------------------------------------------------------------|
| ITBiomarkers | Hematological | WBCex1mv             | White blood cell count exam 1 multivariable, log transformed                | <a href="http://www.ncbi.nlm.nih.gov/projects/gap/cgi-bin/analysis.cgi?id=pha002268">http://www.ncbi.nlm.nih.gov/projects/gap/cgi-bin/analysis.cgi?id=pha002268</a> |
| ITBiomarkers | Hematological | WBCex2as             | White blood cell count exam 2 age & sex                                     | <a href="http://www.ncbi.nlm.nih.gov/projects/gap/cgi-bin/analysis.cgi?id=pha002269">http://www.ncbi.nlm.nih.gov/projects/gap/cgi-bin/analysis.cgi?id=pha002269</a> |
| ITBiomarkers | Hematological | WBCex2mv             | White blood cell count exam 2 multivariable                                 | <a href="http://www.ncbi.nlm.nih.gov/projects/gap/cgi-bin/analysis.cgi?id=pha002270">http://www.ncbi.nlm.nih.gov/projects/gap/cgi-bin/analysis.cgi?id=pha002270</a> |
| ITBiomarkers | Hemostatic    | dDimerex5as          | D dimer at exam 6 age & sex, log transformed                                | <a href="http://www.ncbi.nlm.nih.gov/projects/gap/cgi-bin/analysis.cgi?id=pha002271">http://www.ncbi.nlm.nih.gov/projects/gap/cgi-bin/analysis.cgi?id=pha002271</a> |
| ITBiomarkers | Hemostatic    | dDimerex5mv          | D dimer at exam 6 multivariable, log transformed                            | <a href="http://www.ncbi.nlm.nih.gov/projects/gap/cgi-bin/analysis.cgi?id=pha002272">http://www.ncbi.nlm.nih.gov/projects/gap/cgi-bin/analysis.cgi?id=pha002272</a> |
| ITBiomarkers | Hemostatic    | FibrinogenAvg567as   | Fibrinogen averaged residuals of exam 5, 6 & 7 age & sex, log transformed   | <a href="http://www.ncbi.nlm.nih.gov/projects/gap/cgi-bin/analysis.cgi?id=pha002273">http://www.ncbi.nlm.nih.gov/projects/gap/cgi-bin/analysis.cgi?id=pha002273</a> |
| ITBiomarkers | Hemostatic    | FibrinogenAvg567mv   | Fibrinogen averaged residuals exam 5, 6 & 7 multivariable, log transformed  | <a href="http://www.ncbi.nlm.nih.gov/projects/gap/cgi-bin/analysis.cgi?id=pha002274">http://www.ncbi.nlm.nih.gov/projects/gap/cgi-bin/analysis.cgi?id=pha002274</a> |
| ITBiomarkers | Hemostatic    | Fibrinogenex5as      | Fibrinogen at exam 5 age & sex, log transformed                             | <a href="http://www.ncbi.nlm.nih.gov/projects/gap/cgi-bin/analysis.cgi?id=pha002275">http://www.ncbi.nlm.nih.gov/projects/gap/cgi-bin/analysis.cgi?id=pha002275</a> |
| ITBiomarkers | Hemostatic    | Fibrinogenex5mv      | Fibrinogen at exam 5 multivariable, log transformed                         | <a href="http://www.ncbi.nlm.nih.gov/projects/gap/cgi-bin/analysis.cgi?id=pha002276">http://www.ncbi.nlm.nih.gov/projects/gap/cgi-bin/analysis.cgi?id=pha002276</a> |
| ITBiomarkers | Hemostatic    | Fibrinogenex6as      | Fibrinogen at exam 6 age & sex, log transformed                             | <a href="http://www.ncbi.nlm.nih.gov/projects/gap/cgi-bin/analysis.cgi?id=pha002277">http://www.ncbi.nlm.nih.gov/projects/gap/cgi-bin/analysis.cgi?id=pha002277</a> |
| ITBiomarkers | Hemostatic    | Fibrinogenex6mv      | Fibrinogen at exam 6 multivariable, log transformed                         | <a href="http://www.ncbi.nlm.nih.gov/projects/gap/cgi-bin/analysis.cgi?id=pha002278">http://www.ncbi.nlm.nih.gov/projects/gap/cgi-bin/analysis.cgi?id=pha002278</a> |
| ITBiomarkers | Hemostatic    | Fibrinogenex7as      | Fibrinogen at exam 7 age & sex, log transformed                             | <a href="http://www.ncbi.nlm.nih.gov/projects/gap/cgi-bin/analysis.cgi?id=pha002279">http://www.ncbi.nlm.nih.gov/projects/gap/cgi-bin/analysis.cgi?id=pha002279</a> |
| ITBiomarkers | Hemostatic    | Fibrinogenex7mv      | Fibrinogen at exam 7 multivariable, log transformed                         | <a href="http://www.ncbi.nlm.nih.gov/projects/gap/cgi-bin/analysis.cgi?id=pha002280">http://www.ncbi.nlm.nih.gov/projects/gap/cgi-bin/analysis.cgi?id=pha002280</a> |
| ITBiomarkers | Hemostatic    | FVIIex5as            | Factor VII at exam 5 age & sex                                              | <a href="http://www.ncbi.nlm.nih.gov/projects/gap/cgi-bin/analysis.cgi?id=pha002281">http://www.ncbi.nlm.nih.gov/projects/gap/cgi-bin/analysis.cgi?id=pha002281</a> |
| ITBiomarkers | Hemostatic    | FVIIex5mv            | Factor VII at exam 5 multivariable                                          | <a href="http://www.ncbi.nlm.nih.gov/projects/gap/cgi-bin/analysis.cgi?id=pha002282">http://www.ncbi.nlm.nih.gov/projects/gap/cgi-bin/analysis.cgi?id=pha002282</a> |
| ITBiomarkers | Hemostatic    | PAI1ex56Avgas        | Log plasminogen Activator 1 avg. residuals exam 5 & 6 age & sex             | <a href="http://www.ncbi.nlm.nih.gov/projects/gap/cgi-bin/analysis.cgi?id=pha002283">http://www.ncbi.nlm.nih.gov/projects/gap/cgi-bin/analysis.cgi?id=pha002283</a> |
| ITBiomarkers | Hemostatic    | PAI1ex56Avgmv        | Log plasminogen Activator 1 avg. residuals exam 5 & 6 multivariable         | <a href="http://www.ncbi.nlm.nih.gov/projects/gap/cgi-bin/analysis.cgi?id=pha002284">http://www.ncbi.nlm.nih.gov/projects/gap/cgi-bin/analysis.cgi?id=pha002284</a> |
| ITBiomarkers | Hemostatic    | PAI1ex5as            | Plasminogen Activator 1 at exam 5 age & sex, log transformed                | <a href="http://www.ncbi.nlm.nih.gov/projects/gap/cgi-bin/analysis.cgi?id=pha002285">http://www.ncbi.nlm.nih.gov/projects/gap/cgi-bin/analysis.cgi?id=pha002285</a> |
| ITBiomarkers | Hemostatic    | PAI1ex5mv            | Plasminogen Activator 1 at exam 5 multivariable, log transformed            | <a href="http://www.ncbi.nlm.nih.gov/projects/gap/cgi-bin/analysis.cgi?id=pha002286">http://www.ncbi.nlm.nih.gov/projects/gap/cgi-bin/analysis.cgi?id=pha002286</a> |
| ITBiomarkers | Hemostatic    | PAI1ex6as            | Plasminogen Activator 1 at exam 6 age & sex, log transformed                | <a href="http://www.ncbi.nlm.nih.gov/projects/gap/cgi-bin/analysis.cgi?id=pha002287">http://www.ncbi.nlm.nih.gov/projects/gap/cgi-bin/analysis.cgi?id=pha002287</a> |
| ITBiomarkers | Hemostatic    | PAI1ex6mv            | Plasminogen Activator 1 at exam 6 multivariable, log transformed            | <a href="http://www.ncbi.nlm.nih.gov/projects/gap/cgi-bin/analysis.cgi?id=pha002288">http://www.ncbi.nlm.nih.gov/projects/gap/cgi-bin/analysis.cgi?id=pha002288</a> |
| ITBiomarkers | Hemostatic    | PlateletAgADPex5asNL | Log ADP platelet aggregation exam 5, age & sex, residuals normalized dev.   | <a href="http://www.ncbi.nlm.nih.gov/projects/gap/cgi-bin/analysis.cgi?id=pha002289">http://www.ncbi.nlm.nih.gov/projects/gap/cgi-bin/analysis.cgi?id=pha002289</a> |
| ITBiomarkers | Hemostatic    | PlateletAgADPex5mvNL | Log ADP platelet aggregation exam 5, multivariable residuals normalized dev | <a href="http://www.ncbi.nlm.nih.gov/projects/gap/cgi-bin/analysis.cgi?id=pha002290">http://www.ncbi.nlm.nih.gov/projects/gap/cgi-bin/analysis.cgi?id=pha002290</a> |
| ITBiomarkers | Hemostatic    | PlateletAgColl5as    | Platelet Aggregation to collagen, exam 5, age & sex, log transformed        | <a href="http://www.ncbi.nlm.nih.gov/projects/gap/cgi-bin/analysis.cgi?id=pha002291">http://www.ncbi.nlm.nih.gov/projects/gap/cgi-bin/analysis.cgi?id=pha002291</a> |
| ITBiomarkers | Hemostatic    | PlateletAgColl5mv    | Platelet Aggregation to collagen, exam 5, multivariable, log transformed    | <a href="http://www.ncbi.nlm.nih.gov/projects/gap/cgi-bin/analysis.cgi?id=pha002292">http://www.ncbi.nlm.nih.gov/projects/gap/cgi-bin/analysis.cgi?id=pha002292</a> |
| ITBiomarkers | Hemostatic    | PlateletAgEpiex5as   | Platelet Aggregation to Epinephrine at exam 5 age & sex, log transformed    | <a href="http://www.ncbi.nlm.nih.gov/projects/gap/cgi-bin/analysis.cgi?id=pha002293">http://www.ncbi.nlm.nih.gov/projects/gap/cgi-bin/analysis.cgi?id=pha002293</a> |
| ITBiomarkers | Hemostatic    | PlateletAgEpiex5mv   | Platelet Aggregation to Epinephrine exam 5 multivariable, log transformed   | <a href="http://www.ncbi.nlm.nih.gov/projects/gap/cgi-bin/analysis.cgi?id=pha002294">http://www.ncbi.nlm.nih.gov/projects/gap/cgi-bin/analysis.cgi?id=pha002294</a> |
| ITBiomarkers | Hemostatic    | tPAex5as             | tPA Antigen at exam 5 age & sex, log transformed                            | <a href="http://www.ncbi.nlm.nih.gov/projects/gap/cgi-bin/analysis.cgi?id=pha002295">http://www.ncbi.nlm.nih.gov/projects/gap/cgi-bin/analysis.cgi?id=pha002295</a> |
| ITBiomarkers | Hemostatic    | tPAex5mvWIN          | tPA Antigen exam 5 multivariable, log transformed and residuals winsorized  | <a href="http://www.ncbi.nlm.nih.gov/projects/gap/cgi-bin/analysis.cgi?id=pha002296">http://www.ncbi.nlm.nih.gov/projects/gap/cgi-bin/analysis.cgi?id=pha002296</a> |
| ITBiomarkers | Hemostatic    | Viscosityex5as       | Viscosity I at exam 5 age & sex                                             | <a href="http://www.ncbi.nlm.nih.gov/projects/gap/cgi-bin/analysis.cgi?id=pha002297">http://www.ncbi.nlm.nih.gov/projects/gap/cgi-bin/analysis.cgi?id=pha002297</a> |
| ITBiomarkers | Hemostatic    | Viscosityex5mv       | Viscosity I at exam 5 multivariable                                         | <a href="http://www.ncbi.nlm.nih.gov/projects/gap/cgi-bin/analysis.cgi?id=pha002298">http://www.ncbi.nlm.nih.gov/projects/gap/cgi-bin/analysis.cgi?id=pha002298</a> |
| ITBiomarkers | Hemostatic    | wVWex5as             | von Willebrand Factor at exam 5 age & sex                                   | <a href="http://www.ncbi.nlm.nih.gov/projects/gap/cgi-bin/analysis.cgi?id=pha002299">http://www.ncbi.nlm.nih.gov/projects/gap/cgi-bin/analysis.cgi?id=pha002299</a> |
| ITBiomarkers | Hemostatic    | wVWex5mv             | von Willebrand Factor at exam 5 multivariable                               | <a href="http://www.ncbi.nlm.nih.gov/projects/gap/cgi-bin/analysis.cgi?id=pha002300">http://www.ncbi.nlm.nih.gov/projects/gap/cgi-bin/analysis.cgi?id=pha002300</a> |
| ITBiomarkers | Inflammation  | CD40Lplasmaex7as     | CD40Ligand plasma exam 7, age- & sex-adjusted, log transformed              | <a href="http://www.ncbi.nlm.nih.gov/projects/gap/cgi-bin/analysis.cgi?id=pha002301">http://www.ncbi.nlm.nih.gov/projects/gap/cgi-bin/analysis.cgi?id=pha002301</a> |
| ITBiomarkers | Inflammation  | CD40Lplasmaex7mv     | CD40Ligand plasma exam 7 multivariable-adjusted, log transformed            | <a href="http://www.ncbi.nlm.nih.gov/projects/gap/cgi-bin/analysis.cgi?id=pha002302">http://www.ncbi.nlm.nih.gov/projects/gap/cgi-bin/analysis.cgi?id=pha002302</a> |
| ITBiomarkers | Inflammation  | CD40Lserumex7as      | CD40Ligand serum exam 7, age- & sex-adjusted, log transformed               | <a href="http://www.ncbi.nlm.nih.gov/projects/gap/cgi-bin/analysis.cgi?id=pha002303">http://www.ncbi.nlm.nih.gov/projects/gap/cgi-bin/analysis.cgi?id=pha002303</a> |
| ITBiomarkers | Inflammation  | CD40Lserumex7mv      | CD40Ligand serum, exam 7 multivariable-adjusted, log transformed            | <a href="http://www.ncbi.nlm.nih.gov/projects/gap/cgi-bin/analysis.cgi?id=pha002304">http://www.ncbi.nlm.nih.gov/projects/gap/cgi-bin/analysis.cgi?id=pha002304</a> |
| ITBiomarkers | Inflammation  | CRPavg267asB         | Log C-reactive protein average exam 2, 6 & 7 age- & sex-adjusted            | <a href="http://www.ncbi.nlm.nih.gov/projects/gap/cgi-bin/analysis.cgi?id=pha002329">http://www.ncbi.nlm.nih.gov/projects/gap/cgi-bin/analysis.cgi?id=pha002329</a> |
| ITBiomarkers | Inflammation  | CRPavg267mvB         | Log C-reactive protein average exam 2, 6 & 7, multivariable-adjusted        | <a href="http://www.ncbi.nlm.nih.gov/projects/gap/cgi-bin/analysis.cgi?id=pha002330">http://www.ncbi.nlm.nih.gov/projects/gap/cgi-bin/analysis.cgi?id=pha002330</a> |
| ITBiomarkers | Inflammation  | CRPex2asB            | Log C-reactive protein exam 2, age- & sex-adjusted                          | <a href="http://www.ncbi.nlm.nih.gov/projects/gap/cgi-bin/analysis.cgi?id=pha002331">http://www.ncbi.nlm.nih.gov/projects/gap/cgi-bin/analysis.cgi?id=pha002331</a> |
| ITBiomarkers | Inflammation  | CRPex2mvB            | Log C-reactive protein exam 2, multivariable-adjusted                       | <a href="http://www.ncbi.nlm.nih.gov/projects/gap/cgi-bin/analysis.cgi?id=pha002332">http://www.ncbi.nlm.nih.gov/projects/gap/cgi-bin/analysis.cgi?id=pha002332</a> |
| ITBiomarkers | Inflammation  | CRPex5as             | Log C-reactive protein Hemagen Assay exam 5, age- & sex-adjusted            | <a href="http://www.ncbi.nlm.nih.gov/projects/gap/cgi-bin/analysis.cgi?id=pha002305">http://www.ncbi.nlm.nih.gov/projects/gap/cgi-bin/analysis.cgi?id=pha002305</a> |
| ITBiomarkers | Inflammation  | CRPex5mv             | Log C-reactive protein Hemagen Assay exam 5, multivariable-adjusted         | <a href="http://www.ncbi.nlm.nih.gov/projects/gap/cgi-bin/analysis.cgi?id=pha002306">http://www.ncbi.nlm.nih.gov/projects/gap/cgi-bin/analysis.cgi?id=pha002306</a> |
| ITBiomarkers | Inflammation  | CRPex6as             | Log C-reactive protein exam 6, age- & sex-adjusted                          | <a href="http://www.ncbi.nlm.nih.gov/projects/gap/cgi-bin/analysis.cgi?id=pha002307">http://www.ncbi.nlm.nih.gov/projects/gap/cgi-bin/analysis.cgi?id=pha002307</a> |
| ITBiomarkers | Inflammation  | CRPex6mv             | Log C-reactive protein exam 6, multivariable-adjusted                       | <a href="http://www.ncbi.nlm.nih.gov/projects/gap/cgi-bin/analysis.cgi?id=pha002308">http://www.ncbi.nlm.nih.gov/projects/gap/cgi-bin/analysis.cgi?id=pha002308</a> |
| ITBiomarkers | Inflammation  | CRPex7as             | Log C-reactive protein exam 7, age- & sex-adjusted                          | <a href="http://www.ncbi.nlm.nih.gov/projects/gap/cgi-bin/analysis.cgi?id=pha002309">http://www.ncbi.nlm.nih.gov/projects/gap/cgi-bin/analysis.cgi?id=pha002309</a> |
| ITBiomarkers | Inflammation  | CRPex7mv             | Log C-reactive protein exam 7, multivariable-adjusted                       | <a href="http://www.ncbi.nlm.nih.gov/projects/gap/cgi-bin/analysis.cgi?id=pha002310">http://www.ncbi.nlm.nih.gov/projects/gap/cgi-bin/analysis.cgi?id=pha002310</a> |
| ITBiomarkers | Inflammation  | ICAM1ex7as           | Log intercellular adhesion molecule-1 exam 7, age- & sex-adjusted           | <a href="http://www.ncbi.nlm.nih.gov/projects/gap/cgi-bin/analysis.cgi?id=pha002311">http://www.ncbi.nlm.nih.gov/projects/gap/cgi-bin/analysis.cgi?id=pha002311</a> |
| ITBiomarkers | Inflammation  | ICAM1ex7mv           | Log intercellular adhesion molecule-1 exam 7, multivariable-adjusted        | <a href="http://www.ncbi.nlm.nih.gov/projects/gap/cgi-bin/analysis.cgi?id=pha002312">http://www.ncbi.nlm.nih.gov/projects/gap/cgi-bin/analysis.cgi?id=pha002312</a> |
| ITBiomarkers | Inflammation  | IL6ex7as             | Log interleukin 6 Exam 7, age- & sex-adjusted                               | <a href="http://www.ncbi.nlm.nih.gov/projects/gap/cgi-bin/analysis.cgi?id=pha002313">http://www.ncbi.nlm.nih.gov/projects/gap/cgi-bin/analysis.cgi?id=pha002313</a> |
| ITBiomarkers | Inflammation  | IL6ex7mv             | Log interleukin 6 Exam 7, multivariable-adjusted                            | <a href="http://www.ncbi.nlm.nih.gov/projects/gap/cgi-bin/analysis.cgi?id=pha002314">http://www.ncbi.nlm.nih.gov/projects/gap/cgi-bin/analysis.cgi?id=pha002314</a> |
| ITBiomarkers | Inflammation  | IsoCrUrinePex7as     | Log urinary isoprostanes/creatinine exam 7, age- & sex-adjusted             | <a href="http://www.ncbi.nlm.nih.gov/projects/gap/cgi-bin/analysis.cgi?id=pha002315">http://www.ncbi.nlm.nih.gov/projects/gap/cgi-bin/analysis.cgi?id=pha002315</a> |
| ITBiomarkers | Inflammation  | IsoCrUrinePex7mv     | Log urinary isoprostanes/creatinine exam 7, multivariable-adjusted          | <a href="http://www.ncbi.nlm.nih.gov/projects/gap/cgi-bin/analysis.cgi?id=pha002316">http://www.ncbi.nlm.nih.gov/projects/gap/cgi-bin/analysis.cgi?id=pha002316</a> |
| ITBiomarkers | Inflammation  | MCP1ex7as            | Log monocyte chemoattractant protein 1 exam 7, age- & sex-adjusted          | <a href="http://www.ncbi.nlm.nih.gov/projects/gap/cgi-bin/analysis.cgi?id=pha002317">http://www.ncbi.nlm.nih.gov/projects/gap/cgi-bin/analysis.cgi?id=pha002317</a> |
| ITBiomarkers | Inflammation  | MCP1ex7mv            | Log monocyte chemoattractant protein 1 exam 7, multivariable-adjusted       | <a href="http://www.ncbi.nlm.nih.gov/projects/gap/cgi-bin/analysis.cgi?id=pha002318">http://www.ncbi.nlm.nih.gov/projects/gap/cgi-bin/analysis.cgi?id=pha002318</a> |
| ITBiomarkers | Inflammation  | MPOex7as             | Log myeloperoxidase exam 7, age- & sex-adjusted                             | <a href="http://www.ncbi.nlm.nih.gov/projects/gap/cgi-bin/analysis.cgi?id=pha002319">http://www.ncbi.nlm.nih.gov/projects/gap/cgi-bin/analysis.cgi?id=pha002319</a> |

Online Table 3: Phenotypes Evaluated for Linkage

| Group        | Category     | Trait Label         | Name                                                                         | Linkage Link                                                                                                                                                        |
|--------------|--------------|---------------------|------------------------------------------------------------------------------|---------------------------------------------------------------------------------------------------------------------------------------------------------------------|
| ITBiomarkers | Inflammation | MPOex7mv            | Log myeloperoxidase exam 7, multivariable-adjusted                           | <a href="http://www.ncbi.nlm.nih.gov/projects/gap/cgi-bin/analysis.cgi?id=pha002320">http://www.ncbi.nlm.nih.gov/projects/gap/cgi-bin/analysis.cgi?id=pha002320</a> |
| ITBiomarkers | Inflammation | OPGex7as            | Log osteoprotegerin exam 7, age- & sex-adjusted                              | <a href="http://www.ncbi.nlm.nih.gov/projects/gap/cgi-bin/analysis.cgi?id=pha002321">http://www.ncbi.nlm.nih.gov/projects/gap/cgi-bin/analysis.cgi?id=pha002321</a> |
| ITBiomarkers | Inflammation | OPGex7mv            | Log osteoprotegerin exam 7, multivariable-adjusted                           | <a href="http://www.ncbi.nlm.nih.gov/projects/gap/cgi-bin/analysis.cgi?id=pha002322">http://www.ncbi.nlm.nih.gov/projects/gap/cgi-bin/analysis.cgi?id=pha002322</a> |
| ITBiomarkers | Inflammation | Pselectinex7as      | Log P-selectin exam 7, age- & sex-adjusted                                   | <a href="http://www.ncbi.nlm.nih.gov/projects/gap/cgi-bin/analysis.cgi?id=pha002323">http://www.ncbi.nlm.nih.gov/projects/gap/cgi-bin/analysis.cgi?id=pha002323</a> |
| ITBiomarkers | Inflammation | Pselectinex7mv      | Log P-selectin exam 7, multivariable-adjusted                                | <a href="http://www.ncbi.nlm.nih.gov/projects/gap/cgi-bin/analysis.cgi?id=pha002324">http://www.ncbi.nlm.nih.gov/projects/gap/cgi-bin/analysis.cgi?id=pha002324</a> |
| ITBiomarkers | Inflammation | TNFAex7as           | Log tumor necrosis factor alpha exam 7, age- & sex-adjusted                  | <a href="http://www.ncbi.nlm.nih.gov/projects/gap/cgi-bin/analysis.cgi?id=pha002325">http://www.ncbi.nlm.nih.gov/projects/gap/cgi-bin/analysis.cgi?id=pha002325</a> |
| ITBiomarkers | Inflammation | TNFAex7mv           | Log tumor necrosis factor alpha exam 7, multivariable-adjusted               | <a href="http://www.ncbi.nlm.nih.gov/projects/gap/cgi-bin/analysis.cgi?id=pha002326">http://www.ncbi.nlm.nih.gov/projects/gap/cgi-bin/analysis.cgi?id=pha002326</a> |
| ITBiomarkers | Inflammation | TNFR1lex7as         | Log tumor necrosis factor receptor II exam 7, age- & sex-adjusted            | <a href="http://www.ncbi.nlm.nih.gov/projects/gap/cgi-bin/analysis.cgi?id=pha002327">http://www.ncbi.nlm.nih.gov/projects/gap/cgi-bin/analysis.cgi?id=pha002327</a> |
| ITBiomarkers | Inflammation | TNFR1lex7mv         | Log tumor necrosis factor receptor II exam 7 multivariable-adjusted          | <a href="http://www.ncbi.nlm.nih.gov/projects/gap/cgi-bin/analysis.cgi?id=pha002328">http://www.ncbi.nlm.nih.gov/projects/gap/cgi-bin/analysis.cgi?id=pha002328</a> |
| ITBiomarkers | LFT          | AlkPhosex2asWIN     | Log alkaline phosphatase exam 2 age- & sex-adjusted, winsorized              | <a href="http://www.ncbi.nlm.nih.gov/projects/gap/cgi-bin/analysis.cgi?id=pha002333">http://www.ncbi.nlm.nih.gov/projects/gap/cgi-bin/analysis.cgi?id=pha002333</a> |
| ITBiomarkers | LFT          | AlkPhosex2mvWIN     | Log alkaline phosphatase exam 2, multivariable-adjusted, lwinsorized         | <a href="http://www.ncbi.nlm.nih.gov/projects/gap/cgi-bin/analysis.cgi?id=pha002334">http://www.ncbi.nlm.nih.gov/projects/gap/cgi-bin/analysis.cgi?id=pha002334</a> |
| ITBiomarkers | LFT          | ALTex2asNL          | Log alanine transaminase exam 2, age- & sex-adjusted, normalized deviates    | <a href="http://www.ncbi.nlm.nih.gov/projects/gap/cgi-bin/analysis.cgi?id=pha002335">http://www.ncbi.nlm.nih.gov/projects/gap/cgi-bin/analysis.cgi?id=pha002335</a> |
| ITBiomarkers | LFT          | ALTex2mvNL          | Log alanine transaminase exam 2; multivariable-adjusted, normalized deviate  | <a href="http://www.ncbi.nlm.nih.gov/projects/gap/cgi-bin/analysis.cgi?id=pha002336">http://www.ncbi.nlm.nih.gov/projects/gap/cgi-bin/analysis.cgi?id=pha002336</a> |
| ITBiomarkers | LFT          | ASTex2asNL          | Log aspartate aminotransferase exam 2, age- sex-adjusted normalized deviate  | <a href="http://www.ncbi.nlm.nih.gov/projects/gap/cgi-bin/analysis.cgi?id=pha002337">http://www.ncbi.nlm.nih.gov/projects/gap/cgi-bin/analysis.cgi?id=pha002337</a> |
| ITBiomarkers | LFT          | ASTex2mvNL          | Log aspartate aminotransferase exam 2 multiv. -adjusted, normalized deviates | <a href="http://www.ncbi.nlm.nih.gov/projects/gap/cgi-bin/analysis.cgi?id=pha002338">http://www.ncbi.nlm.nih.gov/projects/gap/cgi-bin/analysis.cgi?id=pha002338</a> |
| ITBiomarkers | LFT          | Bilirubinex2as      | Log bilirubin exam 2, age- & sex-adjusted                                    | <a href="http://www.ncbi.nlm.nih.gov/projects/gap/cgi-bin/analysis.cgi?id=pha002339">http://www.ncbi.nlm.nih.gov/projects/gap/cgi-bin/analysis.cgi?id=pha002339</a> |
| ITBiomarkers | LFT          | Bilirubinex2mv      | Log bilirubin exam 2 multivariable                                           | <a href="http://www.ncbi.nlm.nih.gov/projects/gap/cgi-bin/analysis.cgi?id=pha002340">http://www.ncbi.nlm.nih.gov/projects/gap/cgi-bin/analysis.cgi?id=pha002340</a> |
| ITBiomarkers | LFT          | GGTex2as            | Log gamma-glutamyl transferase exam 2, age- & sex-adjusted                   | <a href="http://www.ncbi.nlm.nih.gov/projects/gap/cgi-bin/analysis.cgi?id=pha002341">http://www.ncbi.nlm.nih.gov/projects/gap/cgi-bin/analysis.cgi?id=pha002341</a> |
| ITBiomarkers | LFT          | GGTex2mv            | Log Gamma-glutamyl transferase exam 2, Multivariable,adjusted                | <a href="http://www.ncbi.nlm.nih.gov/projects/gap/cgi-bin/analysis.cgi?id=pha002342">http://www.ncbi.nlm.nih.gov/projects/gap/cgi-bin/analysis.cgi?id=pha002342</a> |
| ITBiomarkers | Neurohumoral | ANPex6as            | Log atrial natriuretic peptide exam 6, age- & sex-adjusted Tobit-model       | <a href="http://www.ncbi.nlm.nih.gov/projects/gap/cgi-bin/analysis.cgi?id=pha002343">http://www.ncbi.nlm.nih.gov/projects/gap/cgi-bin/analysis.cgi?id=pha002343</a> |
| ITBiomarkers | Neurohumoral | ANPex6mv            | Log atrial natriuretic peptide exam 6, multivariable-adjusted Tobit model    | <a href="http://www.ncbi.nlm.nih.gov/projects/gap/cgi-bin/analysis.cgi?id=pha002344">http://www.ncbi.nlm.nih.gov/projects/gap/cgi-bin/analysis.cgi?id=pha002344</a> |
| ITBiomarkers | Neurohumoral | BNPex6as            | Log brain natriuretic peptide exam 6, age- & sex-adjusted Tobit model        | <a href="http://www.ncbi.nlm.nih.gov/projects/gap/cgi-bin/analysis.cgi?id=pha002345">http://www.ncbi.nlm.nih.gov/projects/gap/cgi-bin/analysis.cgi?id=pha002345</a> |
| ITBiomarkers | Neurohumoral | BNPex6mv            | Log brain natriuretic peptide exam 6, multivariable-adjusted Tobit model     | <a href="http://www.ncbi.nlm.nih.gov/projects/gap/cgi-bin/analysis.cgi?id=pha002346">http://www.ncbi.nlm.nih.gov/projects/gap/cgi-bin/analysis.cgi?id=pha002346</a> |
| ITBiomarkers | Vitamins     | VitD25OHHex6or7as   | 25(OH)-D exam 6 or 7, age & sex adjusted                                     | <a href="http://www.ncbi.nlm.nih.gov/projects/gap/cgi-bin/analysis.cgi?id=pha002347">http://www.ncbi.nlm.nih.gov/projects/gap/cgi-bin/analysis.cgi?id=pha002347</a> |
| ITBiomarkers | Vitamins     | VitD25OHHex6or7mv   | 25(OH)-D exam 6 or 7, multivariable-adjusted; covariates from vit D exam     | <a href="http://www.ncbi.nlm.nih.gov/projects/gap/cgi-bin/analysis.cgi?id=pha002348">http://www.ncbi.nlm.nih.gov/projects/gap/cgi-bin/analysis.cgi?id=pha002348</a> |
| ITBiomarkers | Vitamins     | VitKPhylloqex6or7as | Vit K exam 6 or 7, age & sex adjusted, log transformed, no warfarin          | <a href="http://www.ncbi.nlm.nih.gov/projects/gap/cgi-bin/analysis.cgi?id=pha002349">http://www.ncbi.nlm.nih.gov/projects/gap/cgi-bin/analysis.cgi?id=pha002349</a> |
| ITBiomarkers | Vitamins     | VitKPhylloqex6or7mv | Vit K exam 6 or 7, multivariable-adjusted, log transformed, no warfarin      | <a href="http://www.ncbi.nlm.nih.gov/projects/gap/cgi-bin/analysis.cgi?id=pha002350">http://www.ncbi.nlm.nih.gov/projects/gap/cgi-bin/analysis.cgi?id=pha002350</a> |
| ITBiomarkers | Vitamins     | VitKPUcOCex6or7asNL | %ucOC, exam 6 or 7, age,sex-adjust, log trans., norm. deviates, no warfarin  | <a href="http://www.ncbi.nlm.nih.gov/projects/gap/cgi-bin/analysis.cgi?id=pha002351">http://www.ncbi.nlm.nih.gov/projects/gap/cgi-bin/analysis.cgi?id=pha002351</a> |
| ITBiomarkers | Vitamins     | VitKPUcOCex6or7mvNL | %ucOC, exam 6 or 7, multivariable, log-trans., norm. deviates, no warfarin   | <a href="http://www.ncbi.nlm.nih.gov/projects/gap/cgi-bin/analysis.cgi?id=pha002352">http://www.ncbi.nlm.nih.gov/projects/gap/cgi-bin/analysis.cgi?id=pha002352</a> |
| Metabolic    | Adiposity    | allhgt1602          | adj height, offsp 2 & cohort 16 exams                                        | <a href="http://www.ncbi.nlm.nih.gov/projects/gap/cgi-bin/analysis.cgi?id=pha002353">http://www.ncbi.nlm.nih.gov/projects/gap/cgi-bin/analysis.cgi?id=pha002353</a> |
| Metabolic    | Adiposity    | allhgt1803          | adj height, offsp 3 & cohort 18 exams                                        | <a href="http://www.ncbi.nlm.nih.gov/projects/gap/cgi-bin/analysis.cgi?id=pha002354">http://www.ncbi.nlm.nih.gov/projects/gap/cgi-bin/analysis.cgi?id=pha002354</a> |
| Metabolic    | Adiposity    | allhgt1x01          | adj height, offsp 1 & cohort 10 exams                                        | <a href="http://www.ncbi.nlm.nih.gov/projects/gap/cgi-bin/analysis.cgi?id=pha002355">http://www.ncbi.nlm.nih.gov/projects/gap/cgi-bin/analysis.cgi?id=pha002355</a> |
| Metabolic    | Adiposity    | allhgt2004          | adj height, offsp 4 & cohort 20 exams                                        | <a href="http://www.ncbi.nlm.nih.gov/projects/gap/cgi-bin/analysis.cgi?id=pha002356">http://www.ncbi.nlm.nih.gov/projects/gap/cgi-bin/analysis.cgi?id=pha002356</a> |
| Metabolic    | Adiposity    | allhgt2205          | adj height, offsp 5 & cohort 22 exams                                        | <a href="http://www.ncbi.nlm.nih.gov/projects/gap/cgi-bin/analysis.cgi?id=pha002357">http://www.ncbi.nlm.nih.gov/projects/gap/cgi-bin/analysis.cgi?id=pha002357</a> |
| Metabolic    | Adiposity    | allhgt2406          | adj height, offsp 6 & cohort 24 exams                                        | <a href="http://www.ncbi.nlm.nih.gov/projects/gap/cgi-bin/analysis.cgi?id=pha002358">http://www.ncbi.nlm.nih.gov/projects/gap/cgi-bin/analysis.cgi?id=pha002358</a> |
| Metabolic    | Adiposity    | allhgt2607          | adj height, offsp 7 & cohort 26 exams                                        | <a href="http://www.ncbi.nlm.nih.gov/projects/gap/cgi-bin/analysis.cgi?id=pha002359">http://www.ncbi.nlm.nih.gov/projects/gap/cgi-bin/analysis.cgi?id=pha002359</a> |
| Metabolic    | Adiposity    | allmeanhgt          | adj mean height, offsp 1-7 & cohort 10,16,18,20,22,24,26 exams               | <a href="http://www.ncbi.nlm.nih.gov/projects/gap/cgi-bin/analysis.cgi?id=pha002360">http://www.ncbi.nlm.nih.gov/projects/gap/cgi-bin/analysis.cgi?id=pha002360</a> |
| Metabolic    | Adiposity    | allowst0007         | adj waist, offsp 7                                                           | <a href="http://www.ncbi.nlm.nih.gov/projects/gap/cgi-bin/analysis.cgi?id=pha002361">http://www.ncbi.nlm.nih.gov/projects/gap/cgi-bin/analysis.cgi?id=pha002361</a> |
| Metabolic    | Adiposity    | allrankbmi1602      | rank adj bmi, offsp 2 & cohort 16 exams                                      | <a href="http://www.ncbi.nlm.nih.gov/projects/gap/cgi-bin/analysis.cgi?id=pha002362">http://www.ncbi.nlm.nih.gov/projects/gap/cgi-bin/analysis.cgi?id=pha002362</a> |
| Metabolic    | Adiposity    | allrankbmi1803      | rank adj bmi, offsp 3 & cohort 18 exams                                      | <a href="http://www.ncbi.nlm.nih.gov/projects/gap/cgi-bin/analysis.cgi?id=pha002363">http://www.ncbi.nlm.nih.gov/projects/gap/cgi-bin/analysis.cgi?id=pha002363</a> |
| Metabolic    | Adiposity    | allrankbmi1x01      | rank adj bmi, offsp 1 & cohort 10 exams                                      | <a href="http://www.ncbi.nlm.nih.gov/projects/gap/cgi-bin/analysis.cgi?id=pha002364">http://www.ncbi.nlm.nih.gov/projects/gap/cgi-bin/analysis.cgi?id=pha002364</a> |
| Metabolic    | Adiposity    | allrankbmi2004      | rank adj bmi, offsp 4 & cohort 20 exams                                      | <a href="http://www.ncbi.nlm.nih.gov/projects/gap/cgi-bin/analysis.cgi?id=pha002365">http://www.ncbi.nlm.nih.gov/projects/gap/cgi-bin/analysis.cgi?id=pha002365</a> |
| Metabolic    | Adiposity    | allrankbmi2205      | rank adj bmi, offsp 5 & cohort 22 exams                                      | <a href="http://www.ncbi.nlm.nih.gov/projects/gap/cgi-bin/analysis.cgi?id=pha002366">http://www.ncbi.nlm.nih.gov/projects/gap/cgi-bin/analysis.cgi?id=pha002366</a> |
| Metabolic    | Adiposity    | allrankbmi2406      | rank adj bmi, offsp 6 & cohort 24 exams                                      | <a href="http://www.ncbi.nlm.nih.gov/projects/gap/cgi-bin/analysis.cgi?id=pha002367">http://www.ncbi.nlm.nih.gov/projects/gap/cgi-bin/analysis.cgi?id=pha002367</a> |
| Metabolic    | Adiposity    | allrankbmi2607      | rank adj bmi, offsp 7 & cohort 26 exams                                      | <a href="http://www.ncbi.nlm.nih.gov/projects/gap/cgi-bin/analysis.cgi?id=pha002368">http://www.ncbi.nlm.nih.gov/projects/gap/cgi-bin/analysis.cgi?id=pha002368</a> |
| Metabolic    | Adiposity    | allrankchgmbi       | rank adj bmi change, offsp 1-7 & cohort exams 10-26                          | <a href="http://www.ncbi.nlm.nih.gov/projects/gap/cgi-bin/analysis.cgi?id=pha002369">http://www.ncbi.nlm.nih.gov/projects/gap/cgi-bin/analysis.cgi?id=pha002369</a> |
| Metabolic    | Adiposity    | allrankchgwt        | rank adj weight change, offsp 1-7 & cohort exams 10-26                       | <a href="http://www.ncbi.nlm.nih.gov/projects/gap/cgi-bin/analysis.cgi?id=pha002370">http://www.ncbi.nlm.nih.gov/projects/gap/cgi-bin/analysis.cgi?id=pha002370</a> |
| Metabolic    | Adiposity    | allrankmeanbmi      | rank adj mean bmi, offsp 1-7 & cohort 10,16,18,20,22,24,26 exams             | <a href="http://www.ncbi.nlm.nih.gov/projects/gap/cgi-bin/analysis.cgi?id=pha002371">http://www.ncbi.nlm.nih.gov/projects/gap/cgi-bin/analysis.cgi?id=pha002371</a> |
| Metabolic    | Adiposity    | allrankmeanwgt      | rank adj mean weight, offsp 1-7 & cohort 10,16,18,20,22,24,26 exams          | <a href="http://www.ncbi.nlm.nih.gov/projects/gap/cgi-bin/analysis.cgi?id=pha002372">http://www.ncbi.nlm.nih.gov/projects/gap/cgi-bin/analysis.cgi?id=pha002372</a> |
| Metabolic    | Adiposity    | allrankochgwst      | rank adj waist change, offsp 4 to 7                                          | <a href="http://www.ncbi.nlm.nih.gov/projects/gap/cgi-bin/analysis.cgi?id=pha002373">http://www.ncbi.nlm.nih.gov/projects/gap/cgi-bin/analysis.cgi?id=pha002373</a> |
| Metabolic    | Adiposity    | allrankmeanwst      | rank adj mean waist, offsp 4 to 7                                            | <a href="http://www.ncbi.nlm.nih.gov/projects/gap/cgi-bin/analysis.cgi?id=pha002374">http://www.ncbi.nlm.nih.gov/projects/gap/cgi-bin/analysis.cgi?id=pha002374</a> |
| Metabolic    | Adiposity    | allrankwgt1602      | rank adj weight, offsp 2 & cohort 16 exams                                   | <a href="http://www.ncbi.nlm.nih.gov/projects/gap/cgi-bin/analysis.cgi?id=pha002375">http://www.ncbi.nlm.nih.gov/projects/gap/cgi-bin/analysis.cgi?id=pha002375</a> |
| Metabolic    | Adiposity    | allrankwgt1803      | rank adj weight, offsp 3 & cohort 18 exams                                   | <a href="http://www.ncbi.nlm.nih.gov/projects/gap/cgi-bin/analysis.cgi?id=pha002376">http://www.ncbi.nlm.nih.gov/projects/gap/cgi-bin/analysis.cgi?id=pha002376</a> |
| Metabolic    | Adiposity    | allrankwgt1x01      | rank adj weight, offsp 1 & cohort 10 exams                                   | <a href="http://www.ncbi.nlm.nih.gov/projects/gap/cgi-bin/analysis.cgi?id=pha002377">http://www.ncbi.nlm.nih.gov/projects/gap/cgi-bin/analysis.cgi?id=pha002377</a> |
| Metabolic    | Adiposity    | allrankwgt2004      | rank adj weight, offsp 4 & cohort 20 exams                                   | <a href="http://www.ncbi.nlm.nih.gov/projects/gap/cgi-bin/analysis.cgi?id=pha002378">http://www.ncbi.nlm.nih.gov/projects/gap/cgi-bin/analysis.cgi?id=pha002378</a> |
| Metabolic    | Adiposity    | allrankwgt2205      | rank adj weight, offsp 5 & cohort 22 exams                                   | <a href="http://www.ncbi.nlm.nih.gov/projects/gap/cgi-bin/analysis.cgi?id=pha002379">http://www.ncbi.nlm.nih.gov/projects/gap/cgi-bin/analysis.cgi?id=pha002379</a> |

Online Table 3: Phenotypes Evaluated for Linkage

| Group     | Category  | Trait Label     | Name                                                                       | Linkage Link                                                                                                                                                        |
|-----------|-----------|-----------------|----------------------------------------------------------------------------|---------------------------------------------------------------------------------------------------------------------------------------------------------------------|
| Metabolic | Adiposity | allrankwgt2406  | rank adj weight, offsp 6 & cohort 24 exams                                 | <a href="http://www.ncbi.nlm.nih.gov/projects/gap/cgi-bin/analysis.cgi?id=pha002380">http://www.ncbi.nlm.nih.gov/projects/gap/cgi-bin/analysis.cgi?id=pha002380</a> |
| Metabolic | Adiposity | allrankwgt2607  | rank adj weight, offsp 7 & cohort 26 exams                                 | <a href="http://www.ncbi.nlm.nih.gov/projects/gap/cgi-bin/analysis.cgi?id=pha002381">http://www.ncbi.nlm.nih.gov/projects/gap/cgi-bin/analysis.cgi?id=pha002381</a> |
| Metabolic | Adiposity | allrankwst2306  | rank adj waist, offsp 6 & cohort exam 23                                   | <a href="http://www.ncbi.nlm.nih.gov/projects/gap/cgi-bin/analysis.cgi?id=pha002382">http://www.ncbi.nlm.nih.gov/projects/gap/cgi-bin/analysis.cgi?id=pha002382</a> |
| Metabolic | Adiposity | allwst2004      | adj waist, offsp 4 & cohort 20 exams                                       | <a href="http://www.ncbi.nlm.nih.gov/projects/gap/cgi-bin/analysis.cgi?id=pha002383">http://www.ncbi.nlm.nih.gov/projects/gap/cgi-bin/analysis.cgi?id=pha002383</a> |
| Metabolic | Adiposity | allwst2205      | adj waist, offsp 5 & cohort 22 exams                                       | <a href="http://www.ncbi.nlm.nih.gov/projects/gap/cgi-bin/analysis.cgi?id=pha002384">http://www.ncbi.nlm.nih.gov/projects/gap/cgi-bin/analysis.cgi?id=pha002384</a> |
| Metabolic | Adiposity | femchgbmi       | Female adj bmi change, offsp 1-7 & cohort exams 10-26                      | <a href="http://www.ncbi.nlm.nih.gov/projects/gap/cgi-bin/analysis.cgi?id=pha002385">http://www.ncbi.nlm.nih.gov/projects/gap/cgi-bin/analysis.cgi?id=pha002385</a> |
| Metabolic | Adiposity | femhgt1602      | Female adj height, offsp 2 & cohort 16 exams                               | <a href="http://www.ncbi.nlm.nih.gov/projects/gap/cgi-bin/analysis.cgi?id=pha002386">http://www.ncbi.nlm.nih.gov/projects/gap/cgi-bin/analysis.cgi?id=pha002386</a> |
| Metabolic | Adiposity | femhgt1x01      | Female adj height, offsp 1 & cohort 10 exams                               | <a href="http://www.ncbi.nlm.nih.gov/projects/gap/cgi-bin/analysis.cgi?id=pha002387">http://www.ncbi.nlm.nih.gov/projects/gap/cgi-bin/analysis.cgi?id=pha002387</a> |
| Metabolic | Adiposity | femhgt2004      | Female adj height, offsp 4 & cohort 20 exams                               | <a href="http://www.ncbi.nlm.nih.gov/projects/gap/cgi-bin/analysis.cgi?id=pha002388">http://www.ncbi.nlm.nih.gov/projects/gap/cgi-bin/analysis.cgi?id=pha002388</a> |
| Metabolic | Adiposity | femhgt2205      | Female adj height, offsp 5 & cohort 22 exams                               | <a href="http://www.ncbi.nlm.nih.gov/projects/gap/cgi-bin/analysis.cgi?id=pha002389">http://www.ncbi.nlm.nih.gov/projects/gap/cgi-bin/analysis.cgi?id=pha002389</a> |
| Metabolic | Adiposity | femhgt2406      | Female adj height, offsp 6 & cohort 24 exams                               | <a href="http://www.ncbi.nlm.nih.gov/projects/gap/cgi-bin/analysis.cgi?id=pha002390">http://www.ncbi.nlm.nih.gov/projects/gap/cgi-bin/analysis.cgi?id=pha002390</a> |
| Metabolic | Adiposity | femhgt2607      | Female adj height, offsp 7 & cohort 26 exams                               | <a href="http://www.ncbi.nlm.nih.gov/projects/gap/cgi-bin/analysis.cgi?id=pha002391">http://www.ncbi.nlm.nih.gov/projects/gap/cgi-bin/analysis.cgi?id=pha002391</a> |
| Metabolic | Adiposity | femmeanhgt      | Female adj mean height, offsp 1-7 & cohort 10,16,18,20,22,24,26 exams      | <a href="http://www.ncbi.nlm.nih.gov/projects/gap/cgi-bin/analysis.cgi?id=pha002392">http://www.ncbi.nlm.nih.gov/projects/gap/cgi-bin/analysis.cgi?id=pha002392</a> |
| Metabolic | Adiposity | femochgwt       | Female adj waist change, offsp 4 to 7                                      | <a href="http://www.ncbi.nlm.nih.gov/projects/gap/cgi-bin/analysis.cgi?id=pha002393">http://www.ncbi.nlm.nih.gov/projects/gap/cgi-bin/analysis.cgi?id=pha002393</a> |
| Metabolic | Adiposity | femowst0007     | Female adj waist, offsp 7                                                  | <a href="http://www.ncbi.nlm.nih.gov/projects/gap/cgi-bin/analysis.cgi?id=pha002394">http://www.ncbi.nlm.nih.gov/projects/gap/cgi-bin/analysis.cgi?id=pha002394</a> |
| Metabolic | Adiposity | femrankbmi1602  | Female rank adj bmi, offsp 2 & cohort 16 exams                             | <a href="http://www.ncbi.nlm.nih.gov/projects/gap/cgi-bin/analysis.cgi?id=pha002395">http://www.ncbi.nlm.nih.gov/projects/gap/cgi-bin/analysis.cgi?id=pha002395</a> |
| Metabolic | Adiposity | femrankbmi1803  | Female rank adj bmi, offsp 3 & cohort 18 exams                             | <a href="http://www.ncbi.nlm.nih.gov/projects/gap/cgi-bin/analysis.cgi?id=pha002396">http://www.ncbi.nlm.nih.gov/projects/gap/cgi-bin/analysis.cgi?id=pha002396</a> |
| Metabolic | Adiposity | femrankbmi1x01  | Female rank adj bmi, offsp 1 & cohort 10 exams                             | <a href="http://www.ncbi.nlm.nih.gov/projects/gap/cgi-bin/analysis.cgi?id=pha002397">http://www.ncbi.nlm.nih.gov/projects/gap/cgi-bin/analysis.cgi?id=pha002397</a> |
| Metabolic | Adiposity | femrankbmi2004  | Female rank adj bmi, offsp 4 & cohort 20 exams                             | <a href="http://www.ncbi.nlm.nih.gov/projects/gap/cgi-bin/analysis.cgi?id=pha002398">http://www.ncbi.nlm.nih.gov/projects/gap/cgi-bin/analysis.cgi?id=pha002398</a> |
| Metabolic | Adiposity | femrankbmi2205  | Female rank adj bmi, offsp 5 & cohort 22 exams                             | <a href="http://www.ncbi.nlm.nih.gov/projects/gap/cgi-bin/analysis.cgi?id=pha002399">http://www.ncbi.nlm.nih.gov/projects/gap/cgi-bin/analysis.cgi?id=pha002399</a> |
| Metabolic | Adiposity | femrankbmi2406  | Female rank adj bmi, offsp 6 & cohort 24 exams                             | <a href="http://www.ncbi.nlm.nih.gov/projects/gap/cgi-bin/analysis.cgi?id=pha002400">http://www.ncbi.nlm.nih.gov/projects/gap/cgi-bin/analysis.cgi?id=pha002400</a> |
| Metabolic | Adiposity | femrankbmi2607  | Female rank adj bmi, offsp 7 & cohort 26 exams                             | <a href="http://www.ncbi.nlm.nih.gov/projects/gap/cgi-bin/analysis.cgi?id=pha002401">http://www.ncbi.nlm.nih.gov/projects/gap/cgi-bin/analysis.cgi?id=pha002401</a> |
| Metabolic | Adiposity | femrankchgwt    | Female rank adj weight change, offsp 1-7 & cohort exams 10-26              | <a href="http://www.ncbi.nlm.nih.gov/projects/gap/cgi-bin/analysis.cgi?id=pha002402">http://www.ncbi.nlm.nih.gov/projects/gap/cgi-bin/analysis.cgi?id=pha002402</a> |
| Metabolic | Adiposity | femrankmeanbmi  | Female rank adj mean bmi, offsp 1-7 & cohort 10,16,18,20,22,24,26 exams    | <a href="http://www.ncbi.nlm.nih.gov/projects/gap/cgi-bin/analysis.cgi?id=pha002403">http://www.ncbi.nlm.nih.gov/projects/gap/cgi-bin/analysis.cgi?id=pha002403</a> |
| Metabolic | Adiposity | femrankmeanwgt  | Female rank adj mean weight, offsp 1-7 & cohort 10,16,18,20,22,24,26 exams | <a href="http://www.ncbi.nlm.nih.gov/projects/gap/cgi-bin/analysis.cgi?id=pha002404">http://www.ncbi.nlm.nih.gov/projects/gap/cgi-bin/analysis.cgi?id=pha002404</a> |
| Metabolic | Adiposity | femrankmeanwst  | Female rank adj mean waist, offsp 4 to 7                                   | <a href="http://www.ncbi.nlm.nih.gov/projects/gap/cgi-bin/analysis.cgi?id=pha002405">http://www.ncbi.nlm.nih.gov/projects/gap/cgi-bin/analysis.cgi?id=pha002405</a> |
| Metabolic | Adiposity | femrankwgt1602  | Female rank adj weight, offsp 2 & cohort 16 exams                          | <a href="http://www.ncbi.nlm.nih.gov/projects/gap/cgi-bin/analysis.cgi?id=pha002406">http://www.ncbi.nlm.nih.gov/projects/gap/cgi-bin/analysis.cgi?id=pha002406</a> |
| Metabolic | Adiposity | femrankwgt1803  | Female rank adj weight, offsp 3 & cohort 18 exams                          | <a href="http://www.ncbi.nlm.nih.gov/projects/gap/cgi-bin/analysis.cgi?id=pha002407">http://www.ncbi.nlm.nih.gov/projects/gap/cgi-bin/analysis.cgi?id=pha002407</a> |
| Metabolic | Adiposity | femrankwgt1x01  | Female rank adj weight, offsp 1 & cohort 10 exams                          | <a href="http://www.ncbi.nlm.nih.gov/projects/gap/cgi-bin/analysis.cgi?id=pha002408">http://www.ncbi.nlm.nih.gov/projects/gap/cgi-bin/analysis.cgi?id=pha002408</a> |
| Metabolic | Adiposity | femrankwgt2004  | Female rank adj weight, offsp 4 & cohort 20 exams                          | <a href="http://www.ncbi.nlm.nih.gov/projects/gap/cgi-bin/analysis.cgi?id=pha002409">http://www.ncbi.nlm.nih.gov/projects/gap/cgi-bin/analysis.cgi?id=pha002409</a> |
| Metabolic | Adiposity | femrankwgt2205  | Female rank adj weight, offsp 5 & cohort 22 exams                          | <a href="http://www.ncbi.nlm.nih.gov/projects/gap/cgi-bin/analysis.cgi?id=pha002410">http://www.ncbi.nlm.nih.gov/projects/gap/cgi-bin/analysis.cgi?id=pha002410</a> |
| Metabolic | Adiposity | femrankwgt2406  | Female rank adj weight, offsp 6 & cohort 24 exams                          | <a href="http://www.ncbi.nlm.nih.gov/projects/gap/cgi-bin/analysis.cgi?id=pha002411">http://www.ncbi.nlm.nih.gov/projects/gap/cgi-bin/analysis.cgi?id=pha002411</a> |
| Metabolic | Adiposity | femrankwgt2607  | Female rank adj weight, offsp 7 & cohort 26 exams                          | <a href="http://www.ncbi.nlm.nih.gov/projects/gap/cgi-bin/analysis.cgi?id=pha002412">http://www.ncbi.nlm.nih.gov/projects/gap/cgi-bin/analysis.cgi?id=pha002412</a> |
| Metabolic | Adiposity | femwst2004      | Female adj waist, offsp 4 & cohort 20 exams                                | <a href="http://www.ncbi.nlm.nih.gov/projects/gap/cgi-bin/analysis.cgi?id=pha002413">http://www.ncbi.nlm.nih.gov/projects/gap/cgi-bin/analysis.cgi?id=pha002413</a> |
| Metabolic | Adiposity | femwst2205      | Female adj waist, offsp 5 & cohort 22 exams                                | <a href="http://www.ncbi.nlm.nih.gov/projects/gap/cgi-bin/analysis.cgi?id=pha002414">http://www.ncbi.nlm.nih.gov/projects/gap/cgi-bin/analysis.cgi?id=pha002414</a> |
| Metabolic | Adiposity | femwst2306      | Female adj waist, offsp 6 & cohort exam 23                                 | <a href="http://www.ncbi.nlm.nih.gov/projects/gap/cgi-bin/analysis.cgi?id=pha002415">http://www.ncbi.nlm.nih.gov/projects/gap/cgi-bin/analysis.cgi?id=pha002415</a> |
| Metabolic | Adiposity | malebmi1x01     | Male adj bmi, offsp 1 & cohort 10 exams                                    | <a href="http://www.ncbi.nlm.nih.gov/projects/gap/cgi-bin/analysis.cgi?id=pha002416">http://www.ncbi.nlm.nih.gov/projects/gap/cgi-bin/analysis.cgi?id=pha002416</a> |
| Metabolic | Adiposity | malehgt1803     | Male adj height, offsp 3 & cohort 18 exams                                 | <a href="http://www.ncbi.nlm.nih.gov/projects/gap/cgi-bin/analysis.cgi?id=pha002417">http://www.ncbi.nlm.nih.gov/projects/gap/cgi-bin/analysis.cgi?id=pha002417</a> |
| Metabolic | Adiposity | malehgt1x01     | Male adj height, offsp 1 & cohort 10 exams                                 | <a href="http://www.ncbi.nlm.nih.gov/projects/gap/cgi-bin/analysis.cgi?id=pha002418">http://www.ncbi.nlm.nih.gov/projects/gap/cgi-bin/analysis.cgi?id=pha002418</a> |
| Metabolic | Adiposity | malehgt2004     | Male adj height, offsp 4 & cohort 20 exams                                 | <a href="http://www.ncbi.nlm.nih.gov/projects/gap/cgi-bin/analysis.cgi?id=pha002419">http://www.ncbi.nlm.nih.gov/projects/gap/cgi-bin/analysis.cgi?id=pha002419</a> |
| Metabolic | Adiposity | malehgt2607     | Male adj height, offsp 7 & cohort 26 exams                                 | <a href="http://www.ncbi.nlm.nih.gov/projects/gap/cgi-bin/analysis.cgi?id=pha002420">http://www.ncbi.nlm.nih.gov/projects/gap/cgi-bin/analysis.cgi?id=pha002420</a> |
| Metabolic | Adiposity | malemeanbmi     | Male adj mean bmi, offsp 1-7 & cohort 10,16,18,20,22,24,26 exams           | <a href="http://www.ncbi.nlm.nih.gov/projects/gap/cgi-bin/analysis.cgi?id=pha002421">http://www.ncbi.nlm.nih.gov/projects/gap/cgi-bin/analysis.cgi?id=pha002421</a> |
| Metabolic | Adiposity | malemeanhgt     | Male adj mean hgt, offsp 1-7 & cohort 10,16,18,20,22,24,26 exams           | <a href="http://www.ncbi.nlm.nih.gov/projects/gap/cgi-bin/analysis.cgi?id=pha002422">http://www.ncbi.nlm.nih.gov/projects/gap/cgi-bin/analysis.cgi?id=pha002422</a> |
| Metabolic | Adiposity | malemeanwgt     | Male adj mean weight, offsp 1-7 & cohort 10,16,18,20,22,24,26 exams        | <a href="http://www.ncbi.nlm.nih.gov/projects/gap/cgi-bin/analysis.cgi?id=pha002423">http://www.ncbi.nlm.nih.gov/projects/gap/cgi-bin/analysis.cgi?id=pha002423</a> |
| Metabolic | Adiposity | malemeanwst     | Male adj mean waist, offsp 4 to 7                                          | <a href="http://www.ncbi.nlm.nih.gov/projects/gap/cgi-bin/analysis.cgi?id=pha002424">http://www.ncbi.nlm.nih.gov/projects/gap/cgi-bin/analysis.cgi?id=pha002424</a> |
| Metabolic | Adiposity | maleowst0007    | Male adj waist, offsp 7                                                    | <a href="http://www.ncbi.nlm.nih.gov/projects/gap/cgi-bin/analysis.cgi?id=pha002425">http://www.ncbi.nlm.nih.gov/projects/gap/cgi-bin/analysis.cgi?id=pha002425</a> |
| Metabolic | Adiposity | malerankbmi1602 | Male rank adj bmi, offsp 2 & cohort 16 exams                               | <a href="http://www.ncbi.nlm.nih.gov/projects/gap/cgi-bin/analysis.cgi?id=pha002426">http://www.ncbi.nlm.nih.gov/projects/gap/cgi-bin/analysis.cgi?id=pha002426</a> |
| Metabolic | Adiposity | malerankbmi1803 | Male rank adj bmi, offsp 3 & cohort 18 exams                               | <a href="http://www.ncbi.nlm.nih.gov/projects/gap/cgi-bin/analysis.cgi?id=pha002427">http://www.ncbi.nlm.nih.gov/projects/gap/cgi-bin/analysis.cgi?id=pha002427</a> |
| Metabolic | Adiposity | malerankbmi2004 | Male rank adj bmi, offsp 4 & cohort 20 exams                               | <a href="http://www.ncbi.nlm.nih.gov/projects/gap/cgi-bin/analysis.cgi?id=pha002428">http://www.ncbi.nlm.nih.gov/projects/gap/cgi-bin/analysis.cgi?id=pha002428</a> |
| Metabolic | Adiposity | malerankbmi2205 | Male rank adj bmi, offsp 5 & cohort 22 exams                               | <a href="http://www.ncbi.nlm.nih.gov/projects/gap/cgi-bin/analysis.cgi?id=pha002429">http://www.ncbi.nlm.nih.gov/projects/gap/cgi-bin/analysis.cgi?id=pha002429</a> |
| Metabolic | Adiposity | malerankbmi2406 | Male rank adj bmi, offsp 6 & cohort 24 exams                               | <a href="http://www.ncbi.nlm.nih.gov/projects/gap/cgi-bin/analysis.cgi?id=pha002430">http://www.ncbi.nlm.nih.gov/projects/gap/cgi-bin/analysis.cgi?id=pha002430</a> |
| Metabolic | Adiposity | malerankbmi2607 | Male rank adj bmi, offsp 7 & cohort 26 exams                               | <a href="http://www.ncbi.nlm.nih.gov/projects/gap/cgi-bin/analysis.cgi?id=pha002431">http://www.ncbi.nlm.nih.gov/projects/gap/cgi-bin/analysis.cgi?id=pha002431</a> |
| Metabolic | Adiposity | malerankchgbmi  | Male rank adj bmi change, offsp 1-7 & cohort exams 10-26                   | <a href="http://www.ncbi.nlm.nih.gov/projects/gap/cgi-bin/analysis.cgi?id=pha002432">http://www.ncbi.nlm.nih.gov/projects/gap/cgi-bin/analysis.cgi?id=pha002432</a> |
| Metabolic | Adiposity | malerankchgwt   | Male rank adj weight change, offsp 1-7 & cohort exams 10-26                | <a href="http://www.ncbi.nlm.nih.gov/projects/gap/cgi-bin/analysis.cgi?id=pha002433">http://www.ncbi.nlm.nih.gov/projects/gap/cgi-bin/analysis.cgi?id=pha002433</a> |
| Metabolic | Adiposity | malerankhgt2406 | Male rank adj height, offsp 6 & cohort 24 exams                            | <a href="http://www.ncbi.nlm.nih.gov/projects/gap/cgi-bin/analysis.cgi?id=pha002434">http://www.ncbi.nlm.nih.gov/projects/gap/cgi-bin/analysis.cgi?id=pha002434</a> |
| Metabolic | Adiposity | malerankochgwt  | Male rank adj waist change, offsp 4 to 7                                   | <a href="http://www.ncbi.nlm.nih.gov/projects/gap/cgi-bin/analysis.cgi?id=pha002435">http://www.ncbi.nlm.nih.gov/projects/gap/cgi-bin/analysis.cgi?id=pha002435</a> |



Online Table 3: Phenotypes Evaluated for Linkage

| Group     | Category  | Trait Label     | Name                                                                 | Linkage Link                                                                                                                                                        |
|-----------|-----------|-----------------|----------------------------------------------------------------------|---------------------------------------------------------------------------------------------------------------------------------------------------------------------|
| Metabolic | Adiposity | malerankwgt1602 | Male rank adj weight, offsp 2 & cohort 16 exams                      | <a href="http://www.ncbi.nlm.nih.gov/projects/gap/cgi-bin/analysis.cgi?id=pha002436">http://www.ncbi.nlm.nih.gov/projects/gap/cgi-bin/analysis.cgi?id=pha002436</a> |
| Metabolic | Adiposity | malerankwgt2004 | Male rank adj weight, offsp 4 & cohort 20 exams                      | <a href="http://www.ncbi.nlm.nih.gov/projects/gap/cgi-bin/analysis.cgi?id=pha002437">http://www.ncbi.nlm.nih.gov/projects/gap/cgi-bin/analysis.cgi?id=pha002437</a> |
| Metabolic | Adiposity | malerankwgt2205 | Male rank adj weight, offsp 5 & cohort 22 exams                      | <a href="http://www.ncbi.nlm.nih.gov/projects/gap/cgi-bin/analysis.cgi?id=pha002438">http://www.ncbi.nlm.nih.gov/projects/gap/cgi-bin/analysis.cgi?id=pha002438</a> |
| Metabolic | Adiposity | malerankwst2306 | Male rank adj waist, offsp 6 & cohort exam 23                        | <a href="http://www.ncbi.nlm.nih.gov/projects/gap/cgi-bin/analysis.cgi?id=pha002439">http://www.ncbi.nlm.nih.gov/projects/gap/cgi-bin/analysis.cgi?id=pha002439</a> |
| Metabolic | Adiposity | malewgt1803     | Male adj weight, offsp 3 & cohort 18 exams                           | <a href="http://www.ncbi.nlm.nih.gov/projects/gap/cgi-bin/analysis.cgi?id=pha002440">http://www.ncbi.nlm.nih.gov/projects/gap/cgi-bin/analysis.cgi?id=pha002440</a> |
| Metabolic | Adiposity | malewgt1x01     | Male adj weight, offsp 1 & cohort 10 exams                           | <a href="http://www.ncbi.nlm.nih.gov/projects/gap/cgi-bin/analysis.cgi?id=pha002441">http://www.ncbi.nlm.nih.gov/projects/gap/cgi-bin/analysis.cgi?id=pha002441</a> |
| Metabolic | Adiposity | malewgt2406     | Male adj weight, offsp 6 & cohort 24 exams                           | <a href="http://www.ncbi.nlm.nih.gov/projects/gap/cgi-bin/analysis.cgi?id=pha002442">http://www.ncbi.nlm.nih.gov/projects/gap/cgi-bin/analysis.cgi?id=pha002442</a> |
| Metabolic | Adiposity | malewgt2607     | Male adj weight, offsp 7 & cohort 26 exams                           | <a href="http://www.ncbi.nlm.nih.gov/projects/gap/cgi-bin/analysis.cgi?id=pha002443">http://www.ncbi.nlm.nih.gov/projects/gap/cgi-bin/analysis.cgi?id=pha002443</a> |
| Metabolic | Adiposity | malewst2004     | Male adj waist, offsp 4 & cohort 20 exams                            | <a href="http://www.ncbi.nlm.nih.gov/projects/gap/cgi-bin/analysis.cgi?id=pha002444">http://www.ncbi.nlm.nih.gov/projects/gap/cgi-bin/analysis.cgi?id=pha002444</a> |
| Metabolic | Adiposity | malewst2205     | Male adj waist, offsp 5 & cohort 22 exams                            | <a href="http://www.ncbi.nlm.nih.gov/projects/gap/cgi-bin/analysis.cgi?id=pha002445">http://www.ncbi.nlm.nih.gov/projects/gap/cgi-bin/analysis.cgi?id=pha002445</a> |
| Metabolic | Adiposity | SATAS           | SAT adj for age, age sqr, sex                                        | <a href="http://www.ncbi.nlm.nih.gov/projects/gap/cgi-bin/analysis.cgi?id=pha002446">http://www.ncbi.nlm.nih.gov/projects/gap/cgi-bin/analysis.cgi?id=pha002446</a> |
| Metabolic | Adiposity | SATMV           | SAT adj for age, age square, sex, meno status, smoking               | <a href="http://www.ncbi.nlm.nih.gov/projects/gap/cgi-bin/analysis.cgi?id=pha002447">http://www.ncbi.nlm.nih.gov/projects/gap/cgi-bin/analysis.cgi?id=pha002447</a> |
| Metabolic | Adiposity | SDAS            | Sagittal diameter adj for age, age square, sex                       | <a href="http://www.ncbi.nlm.nih.gov/projects/gap/cgi-bin/analysis.cgi?id=pha002448">http://www.ncbi.nlm.nih.gov/projects/gap/cgi-bin/analysis.cgi?id=pha002448</a> |
| Metabolic | Adiposity | SDMV            | Sagittal diameter adj for age, age square, sex, meno status, smoking | <a href="http://www.ncbi.nlm.nih.gov/projects/gap/cgi-bin/analysis.cgi?id=pha002449">http://www.ncbi.nlm.nih.gov/projects/gap/cgi-bin/analysis.cgi?id=pha002449</a> |
| Metabolic | Adiposity | VATAS           | VAT adj for age, age squared, sex                                    | <a href="http://www.ncbi.nlm.nih.gov/projects/gap/cgi-bin/analysis.cgi?id=pha002450">http://www.ncbi.nlm.nih.gov/projects/gap/cgi-bin/analysis.cgi?id=pha002450</a> |
| Metabolic | Adiposity | VATMV           | VAT adj for age, age squared, sex, meno status, smoking              | <a href="http://www.ncbi.nlm.nih.gov/projects/gap/cgi-bin/analysis.cgi?id=pha002451">http://www.ncbi.nlm.nih.gov/projects/gap/cgi-bin/analysis.cgi?id=pha002451</a> |
| Metabolic | Adiposity | WCAS            | Waist by CT adj for age, age squared, sex                            | <a href="http://www.ncbi.nlm.nih.gov/projects/gap/cgi-bin/analysis.cgi?id=pha002452">http://www.ncbi.nlm.nih.gov/projects/gap/cgi-bin/analysis.cgi?id=pha002452</a> |
| Metabolic | Adiposity | WCMV            | Waist by CT adj for age, age squared, sex, meno status, smoking      | <a href="http://www.ncbi.nlm.nih.gov/projects/gap/cgi-bin/analysis.cgi?id=pha002453">http://www.ncbi.nlm.nih.gov/projects/gap/cgi-bin/analysis.cgi?id=pha002453</a> |
| Metabolic | Glycemic  | res1ladipoq7o   | Age-sex adjusted Adiponectin ex7 offspring                           | <a href="http://www.ncbi.nlm.nih.gov/projects/gap/cgi-bin/analysis.cgi?id=pha002454">http://www.ncbi.nlm.nih.gov/projects/gap/cgi-bin/analysis.cgi?id=pha002454</a> |
| Metabolic | Glycemic  | res2ladipoq7o   | Multivariable adjusted Adiponectin ex7 offspring                     | <a href="http://www.ncbi.nlm.nih.gov/projects/gap/cgi-bin/analysis.cgi?id=pha002455">http://www.ncbi.nlm.nih.gov/projects/gap/cgi-bin/analysis.cgi?id=pha002455</a> |
| Metabolic | Glycemic  | rnk1fglu5o      | Rank Age-sex adjusted Fasting Plasma Glucose ex5 offspring           | <a href="http://www.ncbi.nlm.nih.gov/projects/gap/cgi-bin/analysis.cgi?id=pha002456">http://www.ncbi.nlm.nih.gov/projects/gap/cgi-bin/analysis.cgi?id=pha002456</a> |
| Metabolic | Glycemic  | rnk1fglu7o      | Rank Age-sex adjusted Fasting Plasma Glucose ex7 offspring           | <a href="http://www.ncbi.nlm.nih.gov/projects/gap/cgi-bin/analysis.cgi?id=pha002457">http://www.ncbi.nlm.nih.gov/projects/gap/cgi-bin/analysis.cgi?id=pha002457</a> |
| Metabolic | Glycemic  | rnk1fins5o      | Rank Age-sex adjusted Fasting Insulin ex5 offspring                  | <a href="http://www.ncbi.nlm.nih.gov/projects/gap/cgi-bin/analysis.cgi?id=pha002458">http://www.ncbi.nlm.nih.gov/projects/gap/cgi-bin/analysis.cgi?id=pha002458</a> |
| Metabolic | Glycemic  | rnk1fins7o      | Rank Age-sex adjusted Fasting Insulin ex7 offspring                  | <a href="http://www.ncbi.nlm.nih.gov/projects/gap/cgi-bin/analysis.cgi?id=pha002459">http://www.ncbi.nlm.nih.gov/projects/gap/cgi-bin/analysis.cgi?id=pha002459</a> |
| Metabolic | Glycemic  | rnk1lgutt5o     | Rank Age-sex adjusted Insulin Sensitivity ex5 offspring              | <a href="http://www.ncbi.nlm.nih.gov/projects/gap/cgi-bin/analysis.cgi?id=pha002460">http://www.ncbi.nlm.nih.gov/projects/gap/cgi-bin/analysis.cgi?id=pha002460</a> |
| Metabolic | Glycemic  | rnk1lhba1c5o    | Rank Age-sex adjusted Fasting HbA1c ex5 offspring                    | <a href="http://www.ncbi.nlm.nih.gov/projects/gap/cgi-bin/analysis.cgi?id=pha002461">http://www.ncbi.nlm.nih.gov/projects/gap/cgi-bin/analysis.cgi?id=pha002461</a> |
| Metabolic | Glycemic  | rnk1lhba1c7o    | Rank Age-sex adjusted HbA1c ex7 offspring                            | <a href="http://www.ncbi.nlm.nih.gov/projects/gap/cgi-bin/analysis.cgi?id=pha002462">http://www.ncbi.nlm.nih.gov/projects/gap/cgi-bin/analysis.cgi?id=pha002462</a> |
| Metabolic | Glycemic  | rnk1lhir5o      | Rank Age-sex adjusted HOMA-IR ex5 offspring                          | <a href="http://www.ncbi.nlm.nih.gov/projects/gap/cgi-bin/analysis.cgi?id=pha002463">http://www.ncbi.nlm.nih.gov/projects/gap/cgi-bin/analysis.cgi?id=pha002463</a> |
| Metabolic | Glycemic  | rnk1lhir7o      | Rank Age-sex adjusted HOMA-IR ex7 offspring                          | <a href="http://www.ncbi.nlm.nih.gov/projects/gap/cgi-bin/analysis.cgi?id=pha002464">http://www.ncbi.nlm.nih.gov/projects/gap/cgi-bin/analysis.cgi?id=pha002464</a> |
| Metabolic | Glycemic  | rnk1lmfglu17o   | Rank Age-sex adjusted Mean Plasma Glucose exam1-7 offspring          | <a href="http://www.ncbi.nlm.nih.gov/projects/gap/cgi-bin/analysis.cgi?id=pha002465">http://www.ncbi.nlm.nih.gov/projects/gap/cgi-bin/analysis.cgi?id=pha002465</a> |
| Metabolic | Glycemic  | rnk1lretn7o     | Rank Age-sex adjusted Resistin ex7 offspring                         | <a href="http://www.ncbi.nlm.nih.gov/projects/gap/cgi-bin/analysis.cgi?id=pha002466">http://www.ncbi.nlm.nih.gov/projects/gap/cgi-bin/analysis.cgi?id=pha002466</a> |
| Metabolic | Glycemic  | rnk2lfglu5o     | Rank multivariable adjusted Fasting Plasma Glucose ex5 offspring     | <a href="http://www.ncbi.nlm.nih.gov/projects/gap/cgi-bin/analysis.cgi?id=pha002467">http://www.ncbi.nlm.nih.gov/projects/gap/cgi-bin/analysis.cgi?id=pha002467</a> |
| Metabolic | Glycemic  | rnk2lfglu7o     | Rank multivariable adjusted Fasting Plasma Glucose ex7 offspring     | <a href="http://www.ncbi.nlm.nih.gov/projects/gap/cgi-bin/analysis.cgi?id=pha002468">http://www.ncbi.nlm.nih.gov/projects/gap/cgi-bin/analysis.cgi?id=pha002468</a> |
| Metabolic | Glycemic  | rnk2lfins5o     | Rank multivariable adjusted Fasting Insulin ex5 offspring            | <a href="http://www.ncbi.nlm.nih.gov/projects/gap/cgi-bin/analysis.cgi?id=pha002469">http://www.ncbi.nlm.nih.gov/projects/gap/cgi-bin/analysis.cgi?id=pha002469</a> |
| Metabolic | Glycemic  | rnk2lfins7o     | Rank multivariable adjusted Fasting Insulin ex7 offspring            | <a href="http://www.ncbi.nlm.nih.gov/projects/gap/cgi-bin/analysis.cgi?id=pha002470">http://www.ncbi.nlm.nih.gov/projects/gap/cgi-bin/analysis.cgi?id=pha002470</a> |
| Metabolic | Glycemic  | rnk2lfutt5o     | Rank multivariable adjusted Insulin Sensitivity ex5 offspring        | <a href="http://www.ncbi.nlm.nih.gov/projects/gap/cgi-bin/analysis.cgi?id=pha002471">http://www.ncbi.nlm.nih.gov/projects/gap/cgi-bin/analysis.cgi?id=pha002471</a> |
| Metabolic | Glycemic  | rnk2lhba1c5o    | Rank multivariable adjusted Fasting HbA1c ex5 offspring              | <a href="http://www.ncbi.nlm.nih.gov/projects/gap/cgi-bin/analysis.cgi?id=pha002472">http://www.ncbi.nlm.nih.gov/projects/gap/cgi-bin/analysis.cgi?id=pha002472</a> |
| Metabolic | Glycemic  | rnk2lhba1c7o    | Rank multivariable adjusted HbA1c ex7 offspring                      | <a href="http://www.ncbi.nlm.nih.gov/projects/gap/cgi-bin/analysis.cgi?id=pha002473">http://www.ncbi.nlm.nih.gov/projects/gap/cgi-bin/analysis.cgi?id=pha002473</a> |
| Metabolic | Glycemic  | rnk2lhir5o      | Rank multivariable adjusted HOMA-IR ex5 offspring                    | <a href="http://www.ncbi.nlm.nih.gov/projects/gap/cgi-bin/analysis.cgi?id=pha002474">http://www.ncbi.nlm.nih.gov/projects/gap/cgi-bin/analysis.cgi?id=pha002474</a> |
| Metabolic | Glycemic  | rnk2lhir7o      | Rank multivariable adjusted HOMA-IR ex7 offspring                    | <a href="http://www.ncbi.nlm.nih.gov/projects/gap/cgi-bin/analysis.cgi?id=pha002475">http://www.ncbi.nlm.nih.gov/projects/gap/cgi-bin/analysis.cgi?id=pha002475</a> |
| Metabolic | Glycemic  | rnk2lmfglu17o   | Rank multivariable adjusted Mean Plasma Glucose exam1-7 offspring    | <a href="http://www.ncbi.nlm.nih.gov/projects/gap/cgi-bin/analysis.cgi?id=pha002476">http://www.ncbi.nlm.nih.gov/projects/gap/cgi-bin/analysis.cgi?id=pha002476</a> |
| Metabolic | Glycemic  | rnk2lretn7o     | Rank multivariable adjusted Resistin ex7 offspring                   | <a href="http://www.ncbi.nlm.nih.gov/projects/gap/cgi-bin/analysis.cgi?id=pha002477">http://www.ncbi.nlm.nih.gov/projects/gap/cgi-bin/analysis.cgi?id=pha002477</a> |
| Metabolic | Lipids    | ApoC3a          | Multivariable adj Plasma ApoCIII Level Offsp ex5                     | <a href="http://www.ncbi.nlm.nih.gov/projects/gap/cgi-bin/analysis.cgi?id=pha002478">http://www.ncbi.nlm.nih.gov/projects/gap/cgi-bin/analysis.cgi?id=pha002478</a> |
| Metabolic | Lipids    | ApoC3b          | Age-sex adj Plasma ApoCIII Level Offsp ex5                           | <a href="http://www.ncbi.nlm.nih.gov/projects/gap/cgi-bin/analysis.cgi?id=pha002479">http://www.ncbi.nlm.nih.gov/projects/gap/cgi-bin/analysis.cgi?id=pha002479</a> |
| Metabolic | Lipids    | cholhdl1a       | Multivariable adj Chol-HDL Ratio Offsp ex1                           | <a href="http://www.ncbi.nlm.nih.gov/projects/gap/cgi-bin/analysis.cgi?id=pha002480">http://www.ncbi.nlm.nih.gov/projects/gap/cgi-bin/analysis.cgi?id=pha002480</a> |
| Metabolic | Lipids    | cholhdl1b       | Age-sex adj Chol-HDL Ratio Offsp ex1                                 | <a href="http://www.ncbi.nlm.nih.gov/projects/gap/cgi-bin/analysis.cgi?id=pha002481">http://www.ncbi.nlm.nih.gov/projects/gap/cgi-bin/analysis.cgi?id=pha002481</a> |
| Metabolic | Lipids    | cholhdl2b       | Age-sex adj Chol-HDL Ratio Offsp ex2                                 | <a href="http://www.ncbi.nlm.nih.gov/projects/gap/cgi-bin/analysis.cgi?id=pha002482">http://www.ncbi.nlm.nih.gov/projects/gap/cgi-bin/analysis.cgi?id=pha002482</a> |
| Metabolic | Lipids    | cholhdl3b       | Age-sex adj Chol-HDL Ratio Offsp ex3                                 | <a href="http://www.ncbi.nlm.nih.gov/projects/gap/cgi-bin/analysis.cgi?id=pha002483">http://www.ncbi.nlm.nih.gov/projects/gap/cgi-bin/analysis.cgi?id=pha002483</a> |
| Metabolic | Lipids    | cholhdl4b       | Age-sex adj Chol-HDL Ratio Offsp ex4                                 | <a href="http://www.ncbi.nlm.nih.gov/projects/gap/cgi-bin/analysis.cgi?id=pha002484">http://www.ncbi.nlm.nih.gov/projects/gap/cgi-bin/analysis.cgi?id=pha002484</a> |
| Metabolic | Lipids    | cholhdl5b       | Age-sex adj Chol-HDL Ratio Offsp ex5                                 | <a href="http://www.ncbi.nlm.nih.gov/projects/gap/cgi-bin/analysis.cgi?id=pha002485">http://www.ncbi.nlm.nih.gov/projects/gap/cgi-bin/analysis.cgi?id=pha002485</a> |
| Metabolic | Lipids    | cholhdl7b       | Age-sex adj Chol-HDL Ratio Offsp ex7                                 | <a href="http://www.ncbi.nlm.nih.gov/projects/gap/cgi-bin/analysis.cgi?id=pha002486">http://www.ncbi.nlm.nih.gov/projects/gap/cgi-bin/analysis.cgi?id=pha002486</a> |
| Metabolic | Lipids    | hdl35b          | Age-sex adj HDL3 Offsp ex5                                           | <a href="http://www.ncbi.nlm.nih.gov/projects/gap/cgi-bin/analysis.cgi?id=pha002487">http://www.ncbi.nlm.nih.gov/projects/gap/cgi-bin/analysis.cgi?id=pha002487</a> |
| Metabolic | Lipids    | HDLNMRint4a     | Multivariable adj NMR HDL Int Offsp ex4 or TG > 400                  | <a href="http://www.ncbi.nlm.nih.gov/projects/gap/cgi-bin/analysis.cgi?id=pha002488">http://www.ncbi.nlm.nih.gov/projects/gap/cgi-bin/analysis.cgi?id=pha002488</a> |
| Metabolic | Lipids    | HDLNMRint4b     | Age-sex adj NMR HDL Int Offsp ex4 or TG > 400                        | <a href="http://www.ncbi.nlm.nih.gov/projects/gap/cgi-bin/analysis.cgi?id=pha002489">http://www.ncbi.nlm.nih.gov/projects/gap/cgi-bin/analysis.cgi?id=pha002489</a> |
| Metabolic | Lipids    | HDLNMRsm4a      | Multivariable adj NMR HDL Sm Offsp ex4 or TG > 400                   | <a href="http://www.ncbi.nlm.nih.gov/projects/gap/cgi-bin/analysis.cgi?id=pha002490">http://www.ncbi.nlm.nih.gov/projects/gap/cgi-bin/analysis.cgi?id=pha002490</a> |
| Metabolic | Lipids    | HDLNMRsm4b      | Age-sex adj NMR HDL Sm Offsp ex4 or TG > 400                         | <a href="http://www.ncbi.nlm.nih.gov/projects/gap/cgi-bin/analysis.cgi?id=pha002491">http://www.ncbi.nlm.nih.gov/projects/gap/cgi-bin/analysis.cgi?id=pha002491</a> |

Online Table 3: Phenotypes Evaluated for Linkage

| Group     | Category | Trait Label | Name                                                             | Linkage Link                                                                                                                                                        |
|-----------|----------|-------------|------------------------------------------------------------------|---------------------------------------------------------------------------------------------------------------------------------------------------------------------|
| Metabolic | Lipids   | HDLNMRsz4b  | Age-sex adj NMR HDL Size Offsp ex4 or TG > 400                   | <a href="http://www.ncbi.nlm.nih.gov/projects/gap/cgi-bin/analysis.cgi?id=pha002492">http://www.ncbi.nlm.nih.gov/projects/gap/cgi-bin/analysis.cgi?id=pha002492</a> |
| Metabolic | Lipids   | Idl3b       | Age-sex adj LDL Offsp ex3                                        | <a href="http://www.ncbi.nlm.nih.gov/projects/gap/cgi-bin/analysis.cgi?id=pha002493">http://www.ncbi.nlm.nih.gov/projects/gap/cgi-bin/analysis.cgi?id=pha002493</a> |
| Metabolic | Lipids   | Idl5b       | Age-sex adj LDL Offsp ex5                                        | <a href="http://www.ncbi.nlm.nih.gov/projects/gap/cgi-bin/analysis.cgi?id=pha002494">http://www.ncbi.nlm.nih.gov/projects/gap/cgi-bin/analysis.cgi?id=pha002494</a> |
| Metabolic | Lipids   | LDLNMRlg4a  | Multivariable adj NMR LDL Lg Offsp ex4 or TG > 400               | <a href="http://www.ncbi.nlm.nih.gov/projects/gap/cgi-bin/analysis.cgi?id=pha002495">http://www.ncbi.nlm.nih.gov/projects/gap/cgi-bin/analysis.cgi?id=pha002495</a> |
| Metabolic | Lipids   | LDLNMRlg4b  | Age-sex adj NMR LDL Lg Offsp ex4 or TG > 400                     | <a href="http://www.ncbi.nlm.nih.gov/projects/gap/cgi-bin/analysis.cgi?id=pha002496">http://www.ncbi.nlm.nih.gov/projects/gap/cgi-bin/analysis.cgi?id=pha002496</a> |
| Metabolic | Lipids   | LDLNMRsz4a  | Multivariable adj NMR LDL Size Offsp ex4 or TG > 400             | <a href="http://www.ncbi.nlm.nih.gov/projects/gap/cgi-bin/analysis.cgi?id=pha002497">http://www.ncbi.nlm.nih.gov/projects/gap/cgi-bin/analysis.cgi?id=pha002497</a> |
| Metabolic | Lipids   | LDLNMRsz4b  | Age-sex adj NMR LDL Size Offsp ex4 or TG > 400                   | <a href="http://www.ncbi.nlm.nih.gov/projects/gap/cgi-bin/analysis.cgi?id=pha002498">http://www.ncbi.nlm.nih.gov/projects/gap/cgi-bin/analysis.cgi?id=pha002498</a> |
| Metabolic | Lipids   | rApoA14a    | Multivariable adj Plasma ApoA1 Level Offsp ex4, ranked res       | <a href="http://www.ncbi.nlm.nih.gov/projects/gap/cgi-bin/analysis.cgi?id=pha002499">http://www.ncbi.nlm.nih.gov/projects/gap/cgi-bin/analysis.cgi?id=pha002499</a> |
| Metabolic | Lipids   | rApoA14b    | Age-sex adj Plasma ApoA1 Level Offsp ex4, ranked res             | <a href="http://www.ncbi.nlm.nih.gov/projects/gap/cgi-bin/analysis.cgi?id=pha002500">http://www.ncbi.nlm.nih.gov/projects/gap/cgi-bin/analysis.cgi?id=pha002500</a> |
| Metabolic | Lipids   | rApoB4a     | Multivariable adj Plasma ApoB Level Offsp ex4, ranked res        | <a href="http://www.ncbi.nlm.nih.gov/projects/gap/cgi-bin/analysis.cgi?id=pha002501">http://www.ncbi.nlm.nih.gov/projects/gap/cgi-bin/analysis.cgi?id=pha002501</a> |
| Metabolic | Lipids   | rApoB4b     | Age-sex adj Plasma ApoB Level Offsp ex4, ranked res              | <a href="http://www.ncbi.nlm.nih.gov/projects/gap/cgi-bin/analysis.cgi?id=pha002502">http://www.ncbi.nlm.nih.gov/projects/gap/cgi-bin/analysis.cgi?id=pha002502</a> |
| Metabolic | Lipids   | rchol1a     | Multivariable adj Chol Offsp ex1, ranked res                     | <a href="http://www.ncbi.nlm.nih.gov/projects/gap/cgi-bin/analysis.cgi?id=pha002503">http://www.ncbi.nlm.nih.gov/projects/gap/cgi-bin/analysis.cgi?id=pha002503</a> |
| Metabolic | Lipids   | rchol1b     | Age-sex adj Chol Offsp ex1, ranked res                           | <a href="http://www.ncbi.nlm.nih.gov/projects/gap/cgi-bin/analysis.cgi?id=pha002504">http://www.ncbi.nlm.nih.gov/projects/gap/cgi-bin/analysis.cgi?id=pha002504</a> |
| Metabolic | Lipids   | rchol2b     | Age-sex adj Chol Offsp ex2, ranked res                           | <a href="http://www.ncbi.nlm.nih.gov/projects/gap/cgi-bin/analysis.cgi?id=pha002505">http://www.ncbi.nlm.nih.gov/projects/gap/cgi-bin/analysis.cgi?id=pha002505</a> |
| Metabolic | Lipids   | rchol3b     | Age-sex adj Chol Offsp ex3, ranked res                           | <a href="http://www.ncbi.nlm.nih.gov/projects/gap/cgi-bin/analysis.cgi?id=pha002506">http://www.ncbi.nlm.nih.gov/projects/gap/cgi-bin/analysis.cgi?id=pha002506</a> |
| Metabolic | Lipids   | rchol4b     | Age-sex adj Chol Offsp ex4, ranked res                           | <a href="http://www.ncbi.nlm.nih.gov/projects/gap/cgi-bin/analysis.cgi?id=pha002507">http://www.ncbi.nlm.nih.gov/projects/gap/cgi-bin/analysis.cgi?id=pha002507</a> |
| Metabolic | Lipids   | rchol5b     | Age-sex adj Chol Offsp ex5, ranked res                           | <a href="http://www.ncbi.nlm.nih.gov/projects/gap/cgi-bin/analysis.cgi?id=pha002508">http://www.ncbi.nlm.nih.gov/projects/gap/cgi-bin/analysis.cgi?id=pha002508</a> |
| Metabolic | Lipids   | rchol6b     | Age-sex adj Chol Offsp ex6, ranked res                           | <a href="http://www.ncbi.nlm.nih.gov/projects/gap/cgi-bin/analysis.cgi?id=pha002509">http://www.ncbi.nlm.nih.gov/projects/gap/cgi-bin/analysis.cgi?id=pha002509</a> |
| Metabolic | Lipids   | rchol7b     | Age-sex adj Chol Offsp ex7, ranked res                           | <a href="http://www.ncbi.nlm.nih.gov/projects/gap/cgi-bin/analysis.cgi?id=pha002510">http://www.ncbi.nlm.nih.gov/projects/gap/cgi-bin/analysis.cgi?id=pha002510</a> |
| Metabolic | Lipids   | rcholhdl6b  | Age-sex adj Chol-HDL Ratio Offsp ex6, ranked res                 | <a href="http://www.ncbi.nlm.nih.gov/projects/gap/cgi-bin/analysis.cgi?id=pha002511">http://www.ncbi.nlm.nih.gov/projects/gap/cgi-bin/analysis.cgi?id=pha002511</a> |
| Metabolic | Lipids   | rhd11a      | Multivariable adj HDL Offsp ex1, ranked res                      | <a href="http://www.ncbi.nlm.nih.gov/projects/gap/cgi-bin/analysis.cgi?id=pha002512">http://www.ncbi.nlm.nih.gov/projects/gap/cgi-bin/analysis.cgi?id=pha002512</a> |
| Metabolic | Lipids   | rhd11b      | HDL Offsp ex1, ranked res                                        | <a href="http://www.ncbi.nlm.nih.gov/projects/gap/cgi-bin/analysis.cgi?id=pha002513">http://www.ncbi.nlm.nih.gov/projects/gap/cgi-bin/analysis.cgi?id=pha002513</a> |
| Metabolic | Lipids   | rhd124a     | Multivariable adj HDL2 Offsp ex4, ranked res                     | <a href="http://www.ncbi.nlm.nih.gov/projects/gap/cgi-bin/analysis.cgi?id=pha002514">http://www.ncbi.nlm.nih.gov/projects/gap/cgi-bin/analysis.cgi?id=pha002514</a> |
| Metabolic | Lipids   | rhd124b     | Age-sex adj HDL2 Offsp ex4, ranked res                           | <a href="http://www.ncbi.nlm.nih.gov/projects/gap/cgi-bin/analysis.cgi?id=pha002515">http://www.ncbi.nlm.nih.gov/projects/gap/cgi-bin/analysis.cgi?id=pha002515</a> |
| Metabolic | Lipids   | rhd125a     | Multivariable adj HDL2 Offsp ex5, ranked res                     | <a href="http://www.ncbi.nlm.nih.gov/projects/gap/cgi-bin/analysis.cgi?id=pha002516">http://www.ncbi.nlm.nih.gov/projects/gap/cgi-bin/analysis.cgi?id=pha002516</a> |
| Metabolic | Lipids   | rhd125b     | Age-sex adj HDL2 Offsp ex5, ranked res                           | <a href="http://www.ncbi.nlm.nih.gov/projects/gap/cgi-bin/analysis.cgi?id=pha002517">http://www.ncbi.nlm.nih.gov/projects/gap/cgi-bin/analysis.cgi?id=pha002517</a> |
| Metabolic | Lipids   | rhd12b      | Age-sex adj HDL Offsp ex2, ranked res                            | <a href="http://www.ncbi.nlm.nih.gov/projects/gap/cgi-bin/analysis.cgi?id=pha002518">http://www.ncbi.nlm.nih.gov/projects/gap/cgi-bin/analysis.cgi?id=pha002518</a> |
| Metabolic | Lipids   | rhd134a     | Multivariable adj HDL3 Offsp ex4, ranked res                     | <a href="http://www.ncbi.nlm.nih.gov/projects/gap/cgi-bin/analysis.cgi?id=pha002519">http://www.ncbi.nlm.nih.gov/projects/gap/cgi-bin/analysis.cgi?id=pha002519</a> |
| Metabolic | Lipids   | rhd134b     | Age-sex adj HDL3 Offsp ex4, ranked res                           | <a href="http://www.ncbi.nlm.nih.gov/projects/gap/cgi-bin/analysis.cgi?id=pha002520">http://www.ncbi.nlm.nih.gov/projects/gap/cgi-bin/analysis.cgi?id=pha002520</a> |
| Metabolic | Lipids   | rhd135a     | Multivariable adj HDL3 Offsp ex5, ranked res                     | <a href="http://www.ncbi.nlm.nih.gov/projects/gap/cgi-bin/analysis.cgi?id=pha002521">http://www.ncbi.nlm.nih.gov/projects/gap/cgi-bin/analysis.cgi?id=pha002521</a> |
| Metabolic | Lipids   | rhd13b      | Age-sex adj HDL Offsp ex3, ranked res                            | <a href="http://www.ncbi.nlm.nih.gov/projects/gap/cgi-bin/analysis.cgi?id=pha002522">http://www.ncbi.nlm.nih.gov/projects/gap/cgi-bin/analysis.cgi?id=pha002522</a> |
| Metabolic | Lipids   | rhd14b      | Age-sex adj HDL Offsp ex4, ranked res                            | <a href="http://www.ncbi.nlm.nih.gov/projects/gap/cgi-bin/analysis.cgi?id=pha002523">http://www.ncbi.nlm.nih.gov/projects/gap/cgi-bin/analysis.cgi?id=pha002523</a> |
| Metabolic | Lipids   | rhd15b      | Age-sex adj HDL Offsp ex5, ranked res                            | <a href="http://www.ncbi.nlm.nih.gov/projects/gap/cgi-bin/analysis.cgi?id=pha002524">http://www.ncbi.nlm.nih.gov/projects/gap/cgi-bin/analysis.cgi?id=pha002524</a> |
| Metabolic | Lipids   | rhd16b      | Age-sex adj HDL Offsp ex6, ranked res                            | <a href="http://www.ncbi.nlm.nih.gov/projects/gap/cgi-bin/analysis.cgi?id=pha002525">http://www.ncbi.nlm.nih.gov/projects/gap/cgi-bin/analysis.cgi?id=pha002525</a> |
| Metabolic | Lipids   | rhd17b      | Age-sex adj HDL Offsp ex7, ranked res                            | <a href="http://www.ncbi.nlm.nih.gov/projects/gap/cgi-bin/analysis.cgi?id=pha002526">http://www.ncbi.nlm.nih.gov/projects/gap/cgi-bin/analysis.cgi?id=pha002526</a> |
| Metabolic | Lipids   | rHDLNMRlg4a | Multivariable adj NMR HDL Lg Offsp ex4 or TG > 400, ranked res   | <a href="http://www.ncbi.nlm.nih.gov/projects/gap/cgi-bin/analysis.cgi?id=pha002527">http://www.ncbi.nlm.nih.gov/projects/gap/cgi-bin/analysis.cgi?id=pha002527</a> |
| Metabolic | Lipids   | rHDLNMRlg4b | Age-sex adj NMR HDL Lg Offsp ex4 or TG > 400, ranked res         | <a href="http://www.ncbi.nlm.nih.gov/projects/gap/cgi-bin/analysis.cgi?id=pha002528">http://www.ncbi.nlm.nih.gov/projects/gap/cgi-bin/analysis.cgi?id=pha002528</a> |
| Metabolic | Lipids   | rHDLNMRsz4a | Multivariable adj NMR HDL Size Offsp ex4 or TG > 400, ranked res | <a href="http://www.ncbi.nlm.nih.gov/projects/gap/cgi-bin/analysis.cgi?id=pha002529">http://www.ncbi.nlm.nih.gov/projects/gap/cgi-bin/analysis.cgi?id=pha002529</a> |
| Metabolic | Lipids   | rIDLNMR4a   | Multivariable adj NMR IDL Offsp ex4 or TG > 400, ranked res      | <a href="http://www.ncbi.nlm.nih.gov/projects/gap/cgi-bin/analysis.cgi?id=pha002530">http://www.ncbi.nlm.nih.gov/projects/gap/cgi-bin/analysis.cgi?id=pha002530</a> |
| Metabolic | Lipids   | rIDLNMR4b   | Age-sex adj NMR IDL Offsp ex4 or TG > 400, ranked res            | <a href="http://www.ncbi.nlm.nih.gov/projects/gap/cgi-bin/analysis.cgi?id=pha002531">http://www.ncbi.nlm.nih.gov/projects/gap/cgi-bin/analysis.cgi?id=pha002531</a> |
| Metabolic | Lipids   | rld11a      | Multivariable adj LDL Offsp ex1, ranked res                      | <a href="http://www.ncbi.nlm.nih.gov/projects/gap/cgi-bin/analysis.cgi?id=pha002532">http://www.ncbi.nlm.nih.gov/projects/gap/cgi-bin/analysis.cgi?id=pha002532</a> |
| Metabolic | Lipids   | rld11b      | Age-sex adj LDL Offsp ex1, ranked res                            | <a href="http://www.ncbi.nlm.nih.gov/projects/gap/cgi-bin/analysis.cgi?id=pha002533">http://www.ncbi.nlm.nih.gov/projects/gap/cgi-bin/analysis.cgi?id=pha002533</a> |
| Metabolic | Lipids   | rld12b      | Age-sex adj LDL Offsp ex2, ranked res                            | <a href="http://www.ncbi.nlm.nih.gov/projects/gap/cgi-bin/analysis.cgi?id=pha002534">http://www.ncbi.nlm.nih.gov/projects/gap/cgi-bin/analysis.cgi?id=pha002534</a> |
| Metabolic | Lipids   | rld14b      | Age-sex adj LDL Offsp ex4, ranked res                            | <a href="http://www.ncbi.nlm.nih.gov/projects/gap/cgi-bin/analysis.cgi?id=pha002535">http://www.ncbi.nlm.nih.gov/projects/gap/cgi-bin/analysis.cgi?id=pha002535</a> |
| Metabolic | Lipids   | rld16b      | Age-sex adj LDL Offsp ex6, ranked res                            | <a href="http://www.ncbi.nlm.nih.gov/projects/gap/cgi-bin/analysis.cgi?id=pha002536">http://www.ncbi.nlm.nih.gov/projects/gap/cgi-bin/analysis.cgi?id=pha002536</a> |
| Metabolic | Lipids   | rld17b      | Age-sex adj LDL Offsp ex7, ranked res                            | <a href="http://www.ncbi.nlm.nih.gov/projects/gap/cgi-bin/analysis.cgi?id=pha002537">http://www.ncbi.nlm.nih.gov/projects/gap/cgi-bin/analysis.cgi?id=pha002537</a> |
| Metabolic | Lipids   | rLDLNMRsm4a | Multivariable adj NMR LDL Sm Offsp ex4 , ranked res              | <a href="http://www.ncbi.nlm.nih.gov/projects/gap/cgi-bin/analysis.cgi?id=pha002664">http://www.ncbi.nlm.nih.gov/projects/gap/cgi-bin/analysis.cgi?id=pha002664</a> |
| Metabolic | Lipids   | rLDLNMRsm4b | Age-sex adj NMR LDL Sm Offsp ex4 , ranked res                    | <a href="http://www.ncbi.nlm.nih.gov/projects/gap/cgi-bin/analysis.cgi?id=pha002665">http://www.ncbi.nlm.nih.gov/projects/gap/cgi-bin/analysis.cgi?id=pha002665</a> |
| Metabolic | Lipids   | rIpa3a      | Multivariable adj Lpa Offsp ex3, ranked res                      | <a href="http://www.ncbi.nlm.nih.gov/projects/gap/cgi-bin/analysis.cgi?id=pha002617">http://www.ncbi.nlm.nih.gov/projects/gap/cgi-bin/analysis.cgi?id=pha002617</a> |
| Metabolic | Lipids   | rIpa3b      | Age-sex adj Lpa Offsp ex3, ranked res                            | <a href="http://www.ncbi.nlm.nih.gov/projects/gap/cgi-bin/analysis.cgi?id=pha002618">http://www.ncbi.nlm.nih.gov/projects/gap/cgi-bin/analysis.cgi?id=pha002618</a> |
| Metabolic | Lipids   | RLPTG4a     | Remnant LP TG Offsp ex4                                          | <a href="http://www.ncbi.nlm.nih.gov/projects/gap/cgi-bin/analysis.cgi?id=pha002539">http://www.ncbi.nlm.nih.gov/projects/gap/cgi-bin/analysis.cgi?id=pha002539</a> |
| Metabolic | Lipids   | RLPTG4b     | Remnant LP Age-sex adj TG Offsp ex4                              | <a href="http://www.ncbi.nlm.nih.gov/projects/gap/cgi-bin/analysis.cgi?id=pha002538">http://www.ncbi.nlm.nih.gov/projects/gap/cgi-bin/analysis.cgi?id=pha002538</a> |
| Metabolic | Lipids   | rmeancholb  | Age-sex adj Mean Chol Offsp ex1-7, ranked res                    | <a href="http://www.ncbi.nlm.nih.gov/projects/gap/cgi-bin/analysis.cgi?id=pha002632">http://www.ncbi.nlm.nih.gov/projects/gap/cgi-bin/analysis.cgi?id=pha002632</a> |
| Metabolic | Lipids   | rmeanhdla   | Multivariable adj Mean HDL Offsp ex1-7, ranked res               | <a href="http://www.ncbi.nlm.nih.gov/projects/gap/cgi-bin/analysis.cgi?id=pha002637">http://www.ncbi.nlm.nih.gov/projects/gap/cgi-bin/analysis.cgi?id=pha002637</a> |
| Metabolic | Lipids   | rmeanhdlb   | Age-sex adj Mean HDL Offsp ex1-7, ranked res                     | <a href="http://www.ncbi.nlm.nih.gov/projects/gap/cgi-bin/analysis.cgi?id=pha002638">http://www.ncbi.nlm.nih.gov/projects/gap/cgi-bin/analysis.cgi?id=pha002638</a> |
| Metabolic | Lipids   | rmeanldla   | Multivariable adj Mean LDL Offsp ex1-7, ranked res               | <a href="http://www.ncbi.nlm.nih.gov/projects/gap/cgi-bin/analysis.cgi?id=pha002625">http://www.ncbi.nlm.nih.gov/projects/gap/cgi-bin/analysis.cgi?id=pha002625</a> |

Online Table 3: Phenotypes Evaluated for Linkage

| Group     | Category  | Trait Label    | Name                                                          | Linkage Link                                                                                                                                                        |
|-----------|-----------|----------------|---------------------------------------------------------------|---------------------------------------------------------------------------------------------------------------------------------------------------------------------|
| Metabolic | Lipids    | rmeanldlb      | Age-sex adj Mean LDL Offsp ex1-7, ranked res                  | <a href="http://www.ncbi.nlm.nih.gov/projects/gap/cgi-bin/analysis.cgi?id=pha002626">http://www.ncbi.nlm.nih.gov/projects/gap/cgi-bin/analysis.cgi?id=pha002626</a> |
| Metabolic | Lipids    | rmeantga       | Multivariable adj Mean TG Offsp ex1-7, ranked res             | <a href="http://www.ncbi.nlm.nih.gov/projects/gap/cgi-bin/analysis.cgi?id=pha002619">http://www.ncbi.nlm.nih.gov/projects/gap/cgi-bin/analysis.cgi?id=pha002619</a> |
| Metabolic | Lipids    | rmeantgb       | Age-sex adj Mean TG Offsp ex1-7, ranked res                   | <a href="http://www.ncbi.nlm.nih.gov/projects/gap/cgi-bin/analysis.cgi?id=pha002620">http://www.ncbi.nlm.nih.gov/projects/gap/cgi-bin/analysis.cgi?id=pha002620</a> |
| Metabolic | Lipids    | rPlasmaApoEa   | Multivariable adj Plasma ApoE Level Offsp ex5, ranked res     | <a href="http://www.ncbi.nlm.nih.gov/projects/gap/cgi-bin/analysis.cgi?id=pha002697">http://www.ncbi.nlm.nih.gov/projects/gap/cgi-bin/analysis.cgi?id=pha002697</a> |
| Metabolic | Lipids    | rPlasmaApoEb   | Age-sex adj Plasma ApoE Level Offsp ex5, ranked res           | <a href="http://www.ncbi.nlm.nih.gov/projects/gap/cgi-bin/analysis.cgi?id=pha002698">http://www.ncbi.nlm.nih.gov/projects/gap/cgi-bin/analysis.cgi?id=pha002698</a> |
| Metabolic | Lipids    | rRLPChol4a     | Multivariable adj Remnant LP Chol Offsp ex4, ranked res       | <a href="http://www.ncbi.nlm.nih.gov/projects/gap/cgi-bin/analysis.cgi?id=pha002699">http://www.ncbi.nlm.nih.gov/projects/gap/cgi-bin/analysis.cgi?id=pha002699</a> |
| Metabolic | Lipids    | rRLPChol4b     | Age-sex adj Remnant LP Chol Offsp ex4, ranked res             | <a href="http://www.ncbi.nlm.nih.gov/projects/gap/cgi-bin/analysis.cgi?id=pha002700">http://www.ncbi.nlm.nih.gov/projects/gap/cgi-bin/analysis.cgi?id=pha002700</a> |
| Metabolic | Lipids    | rtg1a          | Multivariable adj TG Offsp ex1, ranked res                    | <a href="http://www.ncbi.nlm.nih.gov/projects/gap/cgi-bin/analysis.cgi?id=pha002540">http://www.ncbi.nlm.nih.gov/projects/gap/cgi-bin/analysis.cgi?id=pha002540</a> |
| Metabolic | Lipids    | rtg1b          | Age-sex adj TG Offsp ex1, ranked res                          | <a href="http://www.ncbi.nlm.nih.gov/projects/gap/cgi-bin/analysis.cgi?id=pha002541">http://www.ncbi.nlm.nih.gov/projects/gap/cgi-bin/analysis.cgi?id=pha002541</a> |
| Metabolic | Lipids    | rtg2b          | Age-sex adj TG Offsp ex2, ranked res                          | <a href="http://www.ncbi.nlm.nih.gov/projects/gap/cgi-bin/analysis.cgi?id=pha002542">http://www.ncbi.nlm.nih.gov/projects/gap/cgi-bin/analysis.cgi?id=pha002542</a> |
| Metabolic | Lipids    | rtg3b          | Age-sex adj TG Offsp ex3, ranked res                          | <a href="http://www.ncbi.nlm.nih.gov/projects/gap/cgi-bin/analysis.cgi?id=pha002543">http://www.ncbi.nlm.nih.gov/projects/gap/cgi-bin/analysis.cgi?id=pha002543</a> |
| Metabolic | Lipids    | rtg5b          | Age-sex adj TG Offsp ex5, ranked res                          | <a href="http://www.ncbi.nlm.nih.gov/projects/gap/cgi-bin/analysis.cgi?id=pha002545">http://www.ncbi.nlm.nih.gov/projects/gap/cgi-bin/analysis.cgi?id=pha002545</a> |
| Metabolic | Lipids    | rtg6b          | Age-sex adj TG Offsp ex6, ranked res                          | <a href="http://www.ncbi.nlm.nih.gov/projects/gap/cgi-bin/analysis.cgi?id=pha002546">http://www.ncbi.nlm.nih.gov/projects/gap/cgi-bin/analysis.cgi?id=pha002546</a> |
| Metabolic | Lipids    | rtg7b          | Age-sex adj TG Offsp ex7, ranked res                          | <a href="http://www.ncbi.nlm.nih.gov/projects/gap/cgi-bin/analysis.cgi?id=pha002547">http://www.ncbi.nlm.nih.gov/projects/gap/cgi-bin/analysis.cgi?id=pha002547</a> |
| Metabolic | Lipids    | rtghdl1a       | Multivariable adj TG-HDL Ratio Offsp ex1, ranked res          | <a href="http://www.ncbi.nlm.nih.gov/projects/gap/cgi-bin/analysis.cgi?id=pha002564">http://www.ncbi.nlm.nih.gov/projects/gap/cgi-bin/analysis.cgi?id=pha002564</a> |
| Metabolic | Lipids    | rVLDLNMRSz4a   | Multivariable adj NMR VLDL Size Offsp ex4, ranked res         | <a href="http://www.ncbi.nlm.nih.gov/projects/gap/cgi-bin/analysis.cgi?id=pha002680">http://www.ncbi.nlm.nih.gov/projects/gap/cgi-bin/analysis.cgi?id=pha002680</a> |
| Metabolic | Lipids    | rVLDLNMRSz4b   | Age-sex adj NMR VLDL Size Offsp ex4, ranked res               | <a href="http://www.ncbi.nlm.nih.gov/projects/gap/cgi-bin/analysis.cgi?id=pha002681">http://www.ncbi.nlm.nih.gov/projects/gap/cgi-bin/analysis.cgi?id=pha002681</a> |
| Metabolic | Lipids    | tg4b           | Age-sex adj TG Offsp ex4                                      | <a href="http://www.ncbi.nlm.nih.gov/projects/gap/cgi-bin/analysis.cgi?id=pha002544">http://www.ncbi.nlm.nih.gov/projects/gap/cgi-bin/analysis.cgi?id=pha002544</a> |
| Metabolic | Lipids    | tghdl1b        | Age-sex adj TG-HDL Ratio Offsp ex1                            | <a href="http://www.ncbi.nlm.nih.gov/projects/gap/cgi-bin/analysis.cgi?id=pha002692">http://www.ncbi.nlm.nih.gov/projects/gap/cgi-bin/analysis.cgi?id=pha002692</a> |
| Metabolic | Lipids    | tghdl2b        | Age-sex adj TG-HDL Ratio Offsp ex2                            | <a href="http://www.ncbi.nlm.nih.gov/projects/gap/cgi-bin/analysis.cgi?id=pha002565">http://www.ncbi.nlm.nih.gov/projects/gap/cgi-bin/analysis.cgi?id=pha002565</a> |
| Metabolic | Lipids    | tghdl3b        | Age-sex adj TG-HDL Ratio Offsp ex3                            | <a href="http://www.ncbi.nlm.nih.gov/projects/gap/cgi-bin/analysis.cgi?id=pha002566">http://www.ncbi.nlm.nih.gov/projects/gap/cgi-bin/analysis.cgi?id=pha002566</a> |
| Metabolic | Lipids    | tghdl4b        | Age-sex adj TG-HDL Ratio Offsp ex4                            | <a href="http://www.ncbi.nlm.nih.gov/projects/gap/cgi-bin/analysis.cgi?id=pha002567">http://www.ncbi.nlm.nih.gov/projects/gap/cgi-bin/analysis.cgi?id=pha002567</a> |
| Metabolic | Lipids    | tghdl5b        | Age-sex adj TG-HDL Ratio Offsp ex5                            | <a href="http://www.ncbi.nlm.nih.gov/projects/gap/cgi-bin/analysis.cgi?id=pha002568">http://www.ncbi.nlm.nih.gov/projects/gap/cgi-bin/analysis.cgi?id=pha002568</a> |
| Metabolic | Lipids    | tghdl6b        | Age-sex adj TG-HDL Ratio Offsp ex6                            | <a href="http://www.ncbi.nlm.nih.gov/projects/gap/cgi-bin/analysis.cgi?id=pha002569">http://www.ncbi.nlm.nih.gov/projects/gap/cgi-bin/analysis.cgi?id=pha002569</a> |
| Metabolic | Lipids    | tghdl7b        | Age-sex adj TG-HDL Ratio Offsp ex7                            | <a href="http://www.ncbi.nlm.nih.gov/projects/gap/cgi-bin/analysis.cgi?id=pha002570">http://www.ncbi.nlm.nih.gov/projects/gap/cgi-bin/analysis.cgi?id=pha002570</a> |
| Metabolic | Lipids    | VLDLNMRInt4a   | Multivariable adj NMR VLDL Int Offsp ex4                      | <a href="http://www.ncbi.nlm.nih.gov/projects/gap/cgi-bin/analysis.cgi?id=pha002670">http://www.ncbi.nlm.nih.gov/projects/gap/cgi-bin/analysis.cgi?id=pha002670</a> |
| Metabolic | Lipids    | VLDLNMRInt4b   | Age-sex adj NMR VLDL Int Offsp ex4                            | <a href="http://www.ncbi.nlm.nih.gov/projects/gap/cgi-bin/analysis.cgi?id=pha002671">http://www.ncbi.nlm.nih.gov/projects/gap/cgi-bin/analysis.cgi?id=pha002671</a> |
| Metabolic | Lipids    | VLDLNMRIg4a    | Multivariable adj NMR VLDL Lg Offsp ex4                       | <a href="http://www.ncbi.nlm.nih.gov/projects/gap/cgi-bin/analysis.cgi?id=pha002674">http://www.ncbi.nlm.nih.gov/projects/gap/cgi-bin/analysis.cgi?id=pha002674</a> |
| Metabolic | Lipids    | VLDLNMRIg4b    | Age-sex adj NMR VLDL Lg Offsp ex4                             | <a href="http://www.ncbi.nlm.nih.gov/projects/gap/cgi-bin/analysis.cgi?id=pha002675">http://www.ncbi.nlm.nih.gov/projects/gap/cgi-bin/analysis.cgi?id=pha002675</a> |
| Metabolic | Lipids    | VLDLNMRSm4a    | Multivariable adj NMR VLDL Sm Offsp ex4                       | <a href="http://www.ncbi.nlm.nih.gov/projects/gap/cgi-bin/analysis.cgi?id=pha002686">http://www.ncbi.nlm.nih.gov/projects/gap/cgi-bin/analysis.cgi?id=pha002686</a> |
| Metabolic | Lipids    | VLDLNMRSm4b    | Age-sex adj NMR VLDL Sm Offsp ex4                             | <a href="http://www.ncbi.nlm.nih.gov/projects/gap/cgi-bin/analysis.cgi?id=pha002687">http://www.ncbi.nlm.nih.gov/projects/gap/cgi-bin/analysis.cgi?id=pha002687</a> |
| Metabolic | Lipidsmen | menHDLNMRint4b | Age-sex adj NMR HDL Int Offsp men ex4                         | <a href="http://www.ncbi.nlm.nih.gov/projects/gap/cgi-bin/analysis.cgi?id=pha002642">http://www.ncbi.nlm.nih.gov/projects/gap/cgi-bin/analysis.cgi?id=pha002642</a> |
| Metabolic | Lipidsmen | menHDLNMRsm4a  | Multivariable adj NMR HDL Sm Offsp men ex4                    | <a href="http://www.ncbi.nlm.nih.gov/projects/gap/cgi-bin/analysis.cgi?id=pha002652">http://www.ncbi.nlm.nih.gov/projects/gap/cgi-bin/analysis.cgi?id=pha002652</a> |
| Metabolic | Lipidsmen | menHDLNMRsm4b  | Age-sex adj NMR HDL Sm Offsp men ex4                          | <a href="http://www.ncbi.nlm.nih.gov/projects/gap/cgi-bin/analysis.cgi?id=pha002653">http://www.ncbi.nlm.nih.gov/projects/gap/cgi-bin/analysis.cgi?id=pha002653</a> |
| Metabolic | Lipidsmen | menHDLNMRsz4b  | Age-sex adj NMR HDL Size Offsp men ex4                        | <a href="http://www.ncbi.nlm.nih.gov/projects/gap/cgi-bin/analysis.cgi?id=pha002648">http://www.ncbi.nlm.nih.gov/projects/gap/cgi-bin/analysis.cgi?id=pha002648</a> |
| Metabolic | Lipidsmen | menldl3b       | Age-sex adj LDL Offsp men ex3                                 | <a href="http://www.ncbi.nlm.nih.gov/projects/gap/cgi-bin/analysis.cgi?id=pha002573">http://www.ncbi.nlm.nih.gov/projects/gap/cgi-bin/analysis.cgi?id=pha002573</a> |
| Metabolic | Lipidsmen | menldl5b       | Age-sex adj LDL Offsp men ex5                                 | <a href="http://www.ncbi.nlm.nih.gov/projects/gap/cgi-bin/analysis.cgi?id=pha002575">http://www.ncbi.nlm.nih.gov/projects/gap/cgi-bin/analysis.cgi?id=pha002575</a> |
| Metabolic | Lipidsmen | menLDLNMRIg4a  | Multivariable adj NMR LDL Lg Offsp men ex4                    | <a href="http://www.ncbi.nlm.nih.gov/projects/gap/cgi-bin/analysis.cgi?id=pha002656">http://www.ncbi.nlm.nih.gov/projects/gap/cgi-bin/analysis.cgi?id=pha002656</a> |
| Metabolic | Lipidsmen | menLDLNMRIg4b  | Age-sex adj NMR LDL Lg Offsp men ex4                          | <a href="http://www.ncbi.nlm.nih.gov/projects/gap/cgi-bin/analysis.cgi?id=pha002657">http://www.ncbi.nlm.nih.gov/projects/gap/cgi-bin/analysis.cgi?id=pha002657</a> |
| Metabolic | Lipidsmen | menLDLNMRSz4a  | Multivariable adj NMR LDL Size Offsp men ex4                  | <a href="http://www.ncbi.nlm.nih.gov/projects/gap/cgi-bin/analysis.cgi?id=pha002660">http://www.ncbi.nlm.nih.gov/projects/gap/cgi-bin/analysis.cgi?id=pha002660</a> |
| Metabolic | Lipidsmen | menLDLNMRSz4b  | Age-sex adj NMR LDL Size Offsp men ex4                        | <a href="http://www.ncbi.nlm.nih.gov/projects/gap/cgi-bin/analysis.cgi?id=pha002661">http://www.ncbi.nlm.nih.gov/projects/gap/cgi-bin/analysis.cgi?id=pha002661</a> |
| Metabolic | Lipidsmen | menrApoB4a     | Multivariable adj Plasma ApoB Level Offsp men ex4, ranked res | <a href="http://www.ncbi.nlm.nih.gov/projects/gap/cgi-bin/analysis.cgi?id=pha002693">http://www.ncbi.nlm.nih.gov/projects/gap/cgi-bin/analysis.cgi?id=pha002693</a> |
| Metabolic | Lipidsmen | menrApoB4b     | Age-sex adj Plasma ApoB Level Offsp men ex4, ranked res       | <a href="http://www.ncbi.nlm.nih.gov/projects/gap/cgi-bin/analysis.cgi?id=pha002694">http://www.ncbi.nlm.nih.gov/projects/gap/cgi-bin/analysis.cgi?id=pha002694</a> |
| Metabolic | Lipidsmen | menrchol1a     | Multivariable adj Chol Offsp men ex1, ranked res              | <a href="http://www.ncbi.nlm.nih.gov/projects/gap/cgi-bin/analysis.cgi?id=pha002585">http://www.ncbi.nlm.nih.gov/projects/gap/cgi-bin/analysis.cgi?id=pha002585</a> |
| Metabolic | Lipidsmen | menrchol1b     | Age-sex adj Chol Offsp men ex1, ranked res                    | <a href="http://www.ncbi.nlm.nih.gov/projects/gap/cgi-bin/analysis.cgi?id=pha002586">http://www.ncbi.nlm.nih.gov/projects/gap/cgi-bin/analysis.cgi?id=pha002586</a> |
| Metabolic | Lipidsmen | menrchol2b     | Age-sex adj Chol Offsp men ex2, ranked res                    | <a href="http://www.ncbi.nlm.nih.gov/projects/gap/cgi-bin/analysis.cgi?id=pha002587">http://www.ncbi.nlm.nih.gov/projects/gap/cgi-bin/analysis.cgi?id=pha002587</a> |
| Metabolic | Lipidsmen | menrchol3b     | Age-sex adj Chol Offsp men ex3, ranked res                    | <a href="http://www.ncbi.nlm.nih.gov/projects/gap/cgi-bin/analysis.cgi?id=pha002588">http://www.ncbi.nlm.nih.gov/projects/gap/cgi-bin/analysis.cgi?id=pha002588</a> |
| Metabolic | Lipidsmen | menrchol5b     | Age-sex adj Chol Offsp men ex5, ranked res                    | <a href="http://www.ncbi.nlm.nih.gov/projects/gap/cgi-bin/analysis.cgi?id=pha002589">http://www.ncbi.nlm.nih.gov/projects/gap/cgi-bin/analysis.cgi?id=pha002589</a> |
| Metabolic | Lipidsmen | menrchol6b     | Age-sex adj Chol Offsp men ex6, ranked res                    | <a href="http://www.ncbi.nlm.nih.gov/projects/gap/cgi-bin/analysis.cgi?id=pha002590">http://www.ncbi.nlm.nih.gov/projects/gap/cgi-bin/analysis.cgi?id=pha002590</a> |
| Metabolic | Lipidsmen | menrchol7b     | Age-sex adj Chol Offsp men ex7, ranked res                    | <a href="http://www.ncbi.nlm.nih.gov/projects/gap/cgi-bin/analysis.cgi?id=pha002591">http://www.ncbi.nlm.nih.gov/projects/gap/cgi-bin/analysis.cgi?id=pha002591</a> |
| Metabolic | Lipidsmen | menrhd1a       | Multivariable adj HDL Offsp men ex1, ranked res               | <a href="http://www.ncbi.nlm.nih.gov/projects/gap/cgi-bin/analysis.cgi?id=pha002600">http://www.ncbi.nlm.nih.gov/projects/gap/cgi-bin/analysis.cgi?id=pha002600</a> |
| Metabolic | Lipidsmen | menrhd1b       | Age-sex adj HDL Offsp men ex1, ranked res                     | <a href="http://www.ncbi.nlm.nih.gov/projects/gap/cgi-bin/analysis.cgi?id=pha002601">http://www.ncbi.nlm.nih.gov/projects/gap/cgi-bin/analysis.cgi?id=pha002601</a> |
| Metabolic | Lipidsmen | menrhd12b      | Age-sex adj HDL Offsp men ex2, ranked res                     | <a href="http://www.ncbi.nlm.nih.gov/projects/gap/cgi-bin/analysis.cgi?id=pha002602">http://www.ncbi.nlm.nih.gov/projects/gap/cgi-bin/analysis.cgi?id=pha002602</a> |
| Metabolic | Lipidsmen | menrhd13b      | Age-sex adj HDL Offsp men ex3, ranked res                     | <a href="http://www.ncbi.nlm.nih.gov/projects/gap/cgi-bin/analysis.cgi?id=pha002603">http://www.ncbi.nlm.nih.gov/projects/gap/cgi-bin/analysis.cgi?id=pha002603</a> |
| Metabolic | Lipidsmen | menrhd14b      | Age-sex adj HDL Offsp men ex4, ranked res                     | <a href="http://www.ncbi.nlm.nih.gov/projects/gap/cgi-bin/analysis.cgi?id=pha002604">http://www.ncbi.nlm.nih.gov/projects/gap/cgi-bin/analysis.cgi?id=pha002604</a> |
| Metabolic | Lipidsmen | menrhd15b      | Age-sex adj HDL Offsp men ex5, ranked res                     | <a href="http://www.ncbi.nlm.nih.gov/projects/gap/cgi-bin/analysis.cgi?id=pha002605">http://www.ncbi.nlm.nih.gov/projects/gap/cgi-bin/analysis.cgi?id=pha002605</a> |



Online Table 3: Phenotypes Evaluated for Linkage

| Group     | Category         | Trait Label          | Name                                                           | Linkage Link                                                                                                                                                        |
|-----------|------------------|----------------------|----------------------------------------------------------------|---------------------------------------------------------------------------------------------------------------------------------------------------------------------|
| Metabolic | Lipidswomen      | womenrhd11b          | Age-sex adj HDL Offsp wom ex1 , ranked res                     | <a href="http://www.ncbi.nlm.nih.gov/projects/gap/cgi-bin/analysis.cgi?id=pha002608">http://www.ncbi.nlm.nih.gov/projects/gap/cgi-bin/analysis.cgi?id=pha002608</a> |
| Metabolic | Lipidswomen      | womenrhd12b          | Age-sex adj HDL Offsp wom ex2, ranked res                      | <a href="http://www.ncbi.nlm.nih.gov/projects/gap/cgi-bin/analysis.cgi?id=pha002609">http://www.ncbi.nlm.nih.gov/projects/gap/cgi-bin/analysis.cgi?id=pha002609</a> |
| Metabolic | Lipidswomen      | womenrhd13b          | Age-sex adj HDL Offsp wom ex3, ranked res                      | <a href="http://www.ncbi.nlm.nih.gov/projects/gap/cgi-bin/analysis.cgi?id=pha002610">http://www.ncbi.nlm.nih.gov/projects/gap/cgi-bin/analysis.cgi?id=pha002610</a> |
| Metabolic | Lipidswomen      | womenrhd14b          | Age-sex adj HDL Offsp wom ex4, ranked res                      | <a href="http://www.ncbi.nlm.nih.gov/projects/gap/cgi-bin/analysis.cgi?id=pha002611">http://www.ncbi.nlm.nih.gov/projects/gap/cgi-bin/analysis.cgi?id=pha002611</a> |
| Metabolic | Lipidswomen      | womenrhd15b          | Age-sex adj HDL Offsp wom ex5, ranked res                      | <a href="http://www.ncbi.nlm.nih.gov/projects/gap/cgi-bin/analysis.cgi?id=pha002612">http://www.ncbi.nlm.nih.gov/projects/gap/cgi-bin/analysis.cgi?id=pha002612</a> |
| Metabolic | Lipidswomen      | womenrhd16b          | Age-sex adj HDL Offsp wom ex6, ranked res                      | <a href="http://www.ncbi.nlm.nih.gov/projects/gap/cgi-bin/analysis.cgi?id=pha002613">http://www.ncbi.nlm.nih.gov/projects/gap/cgi-bin/analysis.cgi?id=pha002613</a> |
| Metabolic | Lipidswomen      | womenrhd17b          | Age-sex adj HDL Offsp wom ex7, ranked res                      | <a href="http://www.ncbi.nlm.nih.gov/projects/gap/cgi-bin/analysis.cgi?id=pha002614">http://www.ncbi.nlm.nih.gov/projects/gap/cgi-bin/analysis.cgi?id=pha002614</a> |
| Metabolic | Lipidswomen      | womenrHDLNMRlg4a     | Multivariable adj NMR HDL Lg Offsp wom ex4 , ranked res        | <a href="http://www.ncbi.nlm.nih.gov/projects/gap/cgi-bin/analysis.cgi?id=pha002646">http://www.ncbi.nlm.nih.gov/projects/gap/cgi-bin/analysis.cgi?id=pha002646</a> |
| Metabolic | Lipidswomen      | womenrHDLNMRlg4b     | Age-sex adj NMR HDL Lg Offsp wom ex4 , ranked res              | <a href="http://www.ncbi.nlm.nih.gov/projects/gap/cgi-bin/analysis.cgi?id=pha002647">http://www.ncbi.nlm.nih.gov/projects/gap/cgi-bin/analysis.cgi?id=pha002647</a> |
| Metabolic | Lipidswomen      | womenrHDLNMRsz4a     | Multivariable adj NMR HDL Size Offsp wom ex4 , ranked res      | <a href="http://www.ncbi.nlm.nih.gov/projects/gap/cgi-bin/analysis.cgi?id=pha002651">http://www.ncbi.nlm.nih.gov/projects/gap/cgi-bin/analysis.cgi?id=pha002651</a> |
| Metabolic | Lipidswomen      | womenrld1a           | Multivariable adj LDL Offsp wom ex1, ranked res                | <a href="http://www.ncbi.nlm.nih.gov/projects/gap/cgi-bin/analysis.cgi?id=pha002578">http://www.ncbi.nlm.nih.gov/projects/gap/cgi-bin/analysis.cgi?id=pha002578</a> |
| Metabolic | Lipidswomen      | womenrld1b           | Age-sex adj LDL Offsp wom ex1, ranked res                      | <a href="http://www.ncbi.nlm.nih.gov/projects/gap/cgi-bin/analysis.cgi?id=pha002616">http://www.ncbi.nlm.nih.gov/projects/gap/cgi-bin/analysis.cgi?id=pha002616</a> |
| Metabolic | Lipidswomen      | womenrld2b           | Age-sex adj LDL Offsp wom ex2, ranked res                      | <a href="http://www.ncbi.nlm.nih.gov/projects/gap/cgi-bin/analysis.cgi?id=pha002579">http://www.ncbi.nlm.nih.gov/projects/gap/cgi-bin/analysis.cgi?id=pha002579</a> |
| Metabolic | Lipidswomen      | womenrld4b           | Age-sex adj LDL Offsp wom ex4, ranked res                      | <a href="http://www.ncbi.nlm.nih.gov/projects/gap/cgi-bin/analysis.cgi?id=pha002581">http://www.ncbi.nlm.nih.gov/projects/gap/cgi-bin/analysis.cgi?id=pha002581</a> |
| Metabolic | Lipidswomen      | womenrld6b           | Age-sex adj LDL Offsp wom ex6, ranked res                      | <a href="http://www.ncbi.nlm.nih.gov/projects/gap/cgi-bin/analysis.cgi?id=pha002583">http://www.ncbi.nlm.nih.gov/projects/gap/cgi-bin/analysis.cgi?id=pha002583</a> |
| Metabolic | Lipidswomen      | womenrld7b           | Age-sex adj LDL Offsp wom ex7, ranked res                      | <a href="http://www.ncbi.nlm.nih.gov/projects/gap/cgi-bin/analysis.cgi?id=pha002584">http://www.ncbi.nlm.nih.gov/projects/gap/cgi-bin/analysis.cgi?id=pha002584</a> |
| Metabolic | Lipidswomen      | womenrLDLNMRsm4a     | Multivariable adj NMR LDL Sm Offsp wom ex4 , ranked res        | <a href="http://www.ncbi.nlm.nih.gov/projects/gap/cgi-bin/analysis.cgi?id=pha002668">http://www.ncbi.nlm.nih.gov/projects/gap/cgi-bin/analysis.cgi?id=pha002668</a> |
| Metabolic | Lipidswomen      | womenrLDLNMRsm4b     | Age-sex adj NMR LDL Sm Offsp wom ex4 , ranked res              | <a href="http://www.ncbi.nlm.nih.gov/projects/gap/cgi-bin/analysis.cgi?id=pha002669">http://www.ncbi.nlm.nih.gov/projects/gap/cgi-bin/analysis.cgi?id=pha002669</a> |
| Metabolic | Lipidswomen      | womenrmeanchola      | Multivariable adj Mean Chol Offsp wom ex1-7, ranked res        | <a href="http://www.ncbi.nlm.nih.gov/projects/gap/cgi-bin/analysis.cgi?id=pha002635">http://www.ncbi.nlm.nih.gov/projects/gap/cgi-bin/analysis.cgi?id=pha002635</a> |
| Metabolic | Lipidswomen      | womenrmeancholb      | Age-sex adj Mean Chol Offsp wom ex1-7, ranked res              | <a href="http://www.ncbi.nlm.nih.gov/projects/gap/cgi-bin/analysis.cgi?id=pha002636">http://www.ncbi.nlm.nih.gov/projects/gap/cgi-bin/analysis.cgi?id=pha002636</a> |
| Metabolic | Lipidswomen      | womenrmeanhdla       | Multivariable adj Mean HDL Offsp wom ex1-7, ranked res         | <a href="http://www.ncbi.nlm.nih.gov/projects/gap/cgi-bin/analysis.cgi?id=pha002640">http://www.ncbi.nlm.nih.gov/projects/gap/cgi-bin/analysis.cgi?id=pha002640</a> |
| Metabolic | Lipidswomen      | womenrmeanhdlb       | Age-sex Mean HDL Offsp wom ex1-7, ranked res                   | <a href="http://www.ncbi.nlm.nih.gov/projects/gap/cgi-bin/analysis.cgi?id=pha002641">http://www.ncbi.nlm.nih.gov/projects/gap/cgi-bin/analysis.cgi?id=pha002641</a> |
| Metabolic | Lipidswomen      | womenrmeanldla       | Multivariable adj Mean LDL Offsp wom ex1-7, ranked res         | <a href="http://www.ncbi.nlm.nih.gov/projects/gap/cgi-bin/analysis.cgi?id=pha002629">http://www.ncbi.nlm.nih.gov/projects/gap/cgi-bin/analysis.cgi?id=pha002629</a> |
| Metabolic | Lipidswomen      | womenrmeanldlb       | Age-sex adj Mean LDL Offsp wom ex1-7, ranked res               | <a href="http://www.ncbi.nlm.nih.gov/projects/gap/cgi-bin/analysis.cgi?id=pha002630">http://www.ncbi.nlm.nih.gov/projects/gap/cgi-bin/analysis.cgi?id=pha002630</a> |
| Metabolic | Lipidswomen      | womenrmeantga        | Multivariable adj Mean TG Offsp wom ex1-7, ranked res          | <a href="http://www.ncbi.nlm.nih.gov/projects/gap/cgi-bin/analysis.cgi?id=pha002623">http://www.ncbi.nlm.nih.gov/projects/gap/cgi-bin/analysis.cgi?id=pha002623</a> |
| Metabolic | Lipidswomen      | womenrmeantgb        | Age-sex adj Mean TG Offsp wom ex1-7, ranked res                | <a href="http://www.ncbi.nlm.nih.gov/projects/gap/cgi-bin/analysis.cgi?id=pha002624">http://www.ncbi.nlm.nih.gov/projects/gap/cgi-bin/analysis.cgi?id=pha002624</a> |
| Metabolic | Lipidswomen      | womenrtg1a           | Multivariable adj TG Offsp wom ex1, ranked res                 | <a href="http://www.ncbi.nlm.nih.gov/projects/gap/cgi-bin/analysis.cgi?id=pha002556">http://www.ncbi.nlm.nih.gov/projects/gap/cgi-bin/analysis.cgi?id=pha002556</a> |
| Metabolic | Lipidswomen      | womenrtg1b           | Age-sex adj TG Offsp wom ex1, ranked res                       | <a href="http://www.ncbi.nlm.nih.gov/projects/gap/cgi-bin/analysis.cgi?id=pha002557">http://www.ncbi.nlm.nih.gov/projects/gap/cgi-bin/analysis.cgi?id=pha002557</a> |
| Metabolic | Lipidswomen      | womenrtg2b           | Age-sex adj TG Offsp wom ex2, ranked res                       | <a href="http://www.ncbi.nlm.nih.gov/projects/gap/cgi-bin/analysis.cgi?id=pha002558">http://www.ncbi.nlm.nih.gov/projects/gap/cgi-bin/analysis.cgi?id=pha002558</a> |
| Metabolic | Lipidswomen      | womenrtg3b           | Age-sex adj TG Offsp wom ex3, ranked res                       | <a href="http://www.ncbi.nlm.nih.gov/projects/gap/cgi-bin/analysis.cgi?id=pha002559">http://www.ncbi.nlm.nih.gov/projects/gap/cgi-bin/analysis.cgi?id=pha002559</a> |
| Metabolic | Lipidswomen      | womenrtg5b           | Age-sex adj TG Offsp wom ex5, ranked res                       | <a href="http://www.ncbi.nlm.nih.gov/projects/gap/cgi-bin/analysis.cgi?id=pha002561">http://www.ncbi.nlm.nih.gov/projects/gap/cgi-bin/analysis.cgi?id=pha002561</a> |
| Metabolic | Lipidswomen      | womenrtg6b           | Age-sex adj TG Offsp wom ex6, ranked res                       | <a href="http://www.ncbi.nlm.nih.gov/projects/gap/cgi-bin/analysis.cgi?id=pha002562">http://www.ncbi.nlm.nih.gov/projects/gap/cgi-bin/analysis.cgi?id=pha002562</a> |
| Metabolic | Lipidswomen      | womenrtg7b           | Age-sex adj TG Offsp wom ex7, ranked res                       | <a href="http://www.ncbi.nlm.nih.gov/projects/gap/cgi-bin/analysis.cgi?id=pha002563">http://www.ncbi.nlm.nih.gov/projects/gap/cgi-bin/analysis.cgi?id=pha002563</a> |
| Metabolic | Lipidswomen      | womenrVLDLNMRsz4a    | Multivariable adj NMR VLDL Size Offsp wom ex4, ranked res      | <a href="http://www.ncbi.nlm.nih.gov/projects/gap/cgi-bin/analysis.cgi?id=pha002684">http://www.ncbi.nlm.nih.gov/projects/gap/cgi-bin/analysis.cgi?id=pha002684</a> |
| Metabolic | Lipidswomen      | womenrVLDLNMRsz4b    | Age-sex adj NMR VLDL Size Offsp wom ex4, ranked res            | <a href="http://www.ncbi.nlm.nih.gov/projects/gap/cgi-bin/analysis.cgi?id=pha002685">http://www.ncbi.nlm.nih.gov/projects/gap/cgi-bin/analysis.cgi?id=pha002685</a> |
| Metabolic | Lipidswomen      | womentg4b            | Age-sex adj TG Offsp wom ex4                                   | <a href="http://www.ncbi.nlm.nih.gov/projects/gap/cgi-bin/analysis.cgi?id=pha002560">http://www.ncbi.nlm.nih.gov/projects/gap/cgi-bin/analysis.cgi?id=pha002560</a> |
| Metabolic | Lipidswomen      | womenVLDLNMRint4a    | Multivariable adj NMR VLDL Int Offsp wom ex4                   | <a href="http://www.ncbi.nlm.nih.gov/projects/gap/cgi-bin/analysis.cgi?id=pha002673">http://www.ncbi.nlm.nih.gov/projects/gap/cgi-bin/analysis.cgi?id=pha002673</a> |
| Metabolic | Lipidswomen      | womenVLDLNMRlg4a     | Multivariable adj NMR VLDL Lg Offsp wom ex4                    | <a href="http://www.ncbi.nlm.nih.gov/projects/gap/cgi-bin/analysis.cgi?id=pha002678">http://www.ncbi.nlm.nih.gov/projects/gap/cgi-bin/analysis.cgi?id=pha002678</a> |
| Metabolic | Lipidswomen      | womenVLDLNMRlg4b     | Age-sex adj NMR VLDL Lg Offsp wom ex4                          | <a href="http://www.ncbi.nlm.nih.gov/projects/gap/cgi-bin/analysis.cgi?id=pha002679">http://www.ncbi.nlm.nih.gov/projects/gap/cgi-bin/analysis.cgi?id=pha002679</a> |
| Metabolic | Lipidswomen      | womenVLDLNMRsm4a     | Multivariable adj NMR VLDL Sm Offsp wom ex4                    | <a href="http://www.ncbi.nlm.nih.gov/projects/gap/cgi-bin/analysis.cgi?id=pha002690">http://www.ncbi.nlm.nih.gov/projects/gap/cgi-bin/analysis.cgi?id=pha002690</a> |
| Metabolic | Lipidswomen      | womenVLDLNMRsm4b     | Age-sex NMR VLDL Sm Offsp wom ex4                              | <a href="http://www.ncbi.nlm.nih.gov/projects/gap/cgi-bin/analysis.cgi?id=pha002691">http://www.ncbi.nlm.nih.gov/projects/gap/cgi-bin/analysis.cgi?id=pha002691</a> |
| Pulmonary | Circadian        | bedtime              | usual weekday bedtime unadjusted                               | <a href="http://www.ncbi.nlm.nih.gov/projects/gap/cgi-bin/analysis.cgi?id=pha002714">http://www.ncbi.nlm.nih.gov/projects/gap/cgi-bin/analysis.cgi?id=pha002714</a> |
| Pulmonary | Circadian        | bedtimeresid         | usual weekday bedtime adjusted                                 | <a href="http://www.ncbi.nlm.nih.gov/projects/gap/cgi-bin/analysis.cgi?id=pha002715">http://www.ncbi.nlm.nih.gov/projects/gap/cgi-bin/analysis.cgi?id=pha002715</a> |
| Pulmonary | Circadian        | sleepdur             | usual weekday sleep duration unadjusted                        | <a href="http://www.ncbi.nlm.nih.gov/projects/gap/cgi-bin/analysis.cgi?id=pha002716">http://www.ncbi.nlm.nih.gov/projects/gap/cgi-bin/analysis.cgi?id=pha002716</a> |
| Pulmonary | Circadian        | sleepdurresid        | usual weekday sleep duration adjusted                          | <a href="http://www.ncbi.nlm.nih.gov/projects/gap/cgi-bin/analysis.cgi?id=pha002717">http://www.ncbi.nlm.nih.gov/projects/gap/cgi-bin/analysis.cgi?id=pha002717</a> |
| Pulmonary | longitudinal     | fef2575longsmoke10w  | rate of decline of FEF(25-75) in 10+ packyear smokers, linkage | <a href="http://www.ncbi.nlm.nih.gov/projects/gap/cgi-bin/analysis.cgi?id=pha002718">http://www.ncbi.nlm.nih.gov/projects/gap/cgi-bin/analysis.cgi?id=pha002718</a> |
| Pulmonary | longitudinal     | fef2575longw         | rate of decline of FEF(25-75), linkage                         | <a href="http://www.ncbi.nlm.nih.gov/projects/gap/cgi-bin/analysis.cgi?id=pha002719">http://www.ncbi.nlm.nih.gov/projects/gap/cgi-bin/analysis.cgi?id=pha002719</a> |
| Pulmonary | longitudinal     | fefvclongw           | rate of decline of FEF(25-75)/FVC, linkage                     | <a href="http://www.ncbi.nlm.nih.gov/projects/gap/cgi-bin/analysis.cgi?id=pha002720">http://www.ncbi.nlm.nih.gov/projects/gap/cgi-bin/analysis.cgi?id=pha002720</a> |
| Pulmonary | longitudinal     | fev1fvcclongsmoke10w | rate of decline of FEV1/FVC in 10+ packyear smokers, linkage   | <a href="http://www.ncbi.nlm.nih.gov/projects/gap/cgi-bin/analysis.cgi?id=pha002721">http://www.ncbi.nlm.nih.gov/projects/gap/cgi-bin/analysis.cgi?id=pha002721</a> |
| Pulmonary | longitudinal     | fev1fvcclongw        | rate of decline of FEV1/FVC, linkage                           | <a href="http://www.ncbi.nlm.nih.gov/projects/gap/cgi-bin/analysis.cgi?id=pha002722">http://www.ncbi.nlm.nih.gov/projects/gap/cgi-bin/analysis.cgi?id=pha002722</a> |
| Pulmonary | longitudinal     | fev1longw            | rate of decline of FEV1, linkage                               | <a href="http://www.ncbi.nlm.nih.gov/projects/gap/cgi-bin/analysis.cgi?id=pha002723">http://www.ncbi.nlm.nih.gov/projects/gap/cgi-bin/analysis.cgi?id=pha002723</a> |
| Pulmonary | longitudinal     | fvcclongw            | rate of decline of FVC, linkage                                | <a href="http://www.ncbi.nlm.nih.gov/projects/gap/cgi-bin/analysis.cgi?id=pha002724">http://www.ncbi.nlm.nih.gov/projects/gap/cgi-bin/analysis.cgi?id=pha002724</a> |
| Pulmonary | mean             | genomefev1           | mean FEV1 from 2 examinations                                  | <a href="http://www.ncbi.nlm.nih.gov/projects/gap/cgi-bin/analysis.cgi?id=pha002725">http://www.ncbi.nlm.nih.gov/projects/gap/cgi-bin/analysis.cgi?id=pha002725</a> |
| Pulmonary | mean             | genomefvc            | mean FVC from 2 examinations                                   | <a href="http://www.ncbi.nlm.nih.gov/projects/gap/cgi-bin/analysis.cgi?id=pha002726">http://www.ncbi.nlm.nih.gov/projects/gap/cgi-bin/analysis.cgi?id=pha002726</a> |
| Pulmonary | mean             | genomeratio          | mean FEV1/FVC from 2 examinations                              | <a href="http://www.ncbi.nlm.nih.gov/projects/gap/cgi-bin/analysis.cgi?id=pha002727">http://www.ncbi.nlm.nih.gov/projects/gap/cgi-bin/analysis.cgi?id=pha002727</a> |
| Pulmonary | ppcrosssectional | ppfefadj             | percent predicted FEF(25-75) at latest exam                    | <a href="http://www.ncbi.nlm.nih.gov/projects/gap/cgi-bin/analysis.cgi?id=pha002728">http://www.ncbi.nlm.nih.gov/projects/gap/cgi-bin/analysis.cgi?id=pha002728</a> |

Online Table 3: Phenotypes Evaluated for Linkage

| Group     | Category         | Trait Label      | Name                                                                        | Linkage Link                                                                                                                                                        |
|-----------|------------------|------------------|-----------------------------------------------------------------------------|---------------------------------------------------------------------------------------------------------------------------------------------------------------------|
| Pulmonary | ppcrosssectional | ppfefadjsm10     | percent predicted FEF(25-75) at latest exam in 10+ packyear smokers         | <a href="http://www.ncbi.nlm.nih.gov/projects/gap/cgi-bin/analysis.cgi?id=pha002729">http://www.ncbi.nlm.nih.gov/projects/gap/cgi-bin/analysis.cgi?id=pha002729</a> |
| Pulmonary | ppcrosssectional | ppfefratadjsm10w | percent predicted FEF(25-75)/FVC latest exam, 10+ packyear smokers, linkage | <a href="http://www.ncbi.nlm.nih.gov/projects/gap/cgi-bin/analysis.cgi?id=pha002730">http://www.ncbi.nlm.nih.gov/projects/gap/cgi-bin/analysis.cgi?id=pha002730</a> |
| Pulmonary | ppcrosssectional | ppfefratadjw     | percent predicted FEF(25-75)/FVC at latest exam, linkage                    | <a href="http://www.ncbi.nlm.nih.gov/projects/gap/cgi-bin/analysis.cgi?id=pha002731">http://www.ncbi.nlm.nih.gov/projects/gap/cgi-bin/analysis.cgi?id=pha002731</a> |
| Pulmonary | ppcrosssectional | ppfef1adj        | percent predicted FEV1 at latest exam                                       | <a href="http://www.ncbi.nlm.nih.gov/projects/gap/cgi-bin/analysis.cgi?id=pha002732">http://www.ncbi.nlm.nih.gov/projects/gap/cgi-bin/analysis.cgi?id=pha002732</a> |
| Pulmonary | ppcrosssectional | ppfef1adjsm10    | percent predicted FEV1 at latest exam in 10+ packyear smokers               | <a href="http://www.ncbi.nlm.nih.gov/projects/gap/cgi-bin/analysis.cgi?id=pha002733">http://www.ncbi.nlm.nih.gov/projects/gap/cgi-bin/analysis.cgi?id=pha002733</a> |
| Pulmonary | ppcrosssectional | ppfvcadj         | percent predicted FVC at latest exam                                        | <a href="http://www.ncbi.nlm.nih.gov/projects/gap/cgi-bin/analysis.cgi?id=pha002734">http://www.ncbi.nlm.nih.gov/projects/gap/cgi-bin/analysis.cgi?id=pha002734</a> |
| Pulmonary | ppcrosssectional | ppfvcadjsm10     | percent predicted FVC at latest exam in 10+ packyear smokers                | <a href="http://www.ncbi.nlm.nih.gov/projects/gap/cgi-bin/analysis.cgi?id=pha002735">http://www.ncbi.nlm.nih.gov/projects/gap/cgi-bin/analysis.cgi?id=pha002735</a> |
| Pulmonary | ppcrosssectional | ppratioadjsm10   | percent predicted FEV1/FVC at latest exam in 10+ packyear smokers           | <a href="http://www.ncbi.nlm.nih.gov/projects/gap/cgi-bin/analysis.cgi?id=pha002736">http://www.ncbi.nlm.nih.gov/projects/gap/cgi-bin/analysis.cgi?id=pha002736</a> |
| Pulmonary | ppcrosssectional | ppratioadjw      | percent predicted FEV1/FVC at latest exam, linkage                          | <a href="http://www.ncbi.nlm.nih.gov/projects/gap/cgi-bin/analysis.cgi?id=pha002737">http://www.ncbi.nlm.nih.gov/projects/gap/cgi-bin/analysis.cgi?id=pha002737</a> |
| Pulmonary | rcrosssectional  | rfefadj          | residual from predicted FEF(25-75) at latest exam                           | <a href="http://www.ncbi.nlm.nih.gov/projects/gap/cgi-bin/analysis.cgi?id=pha002738">http://www.ncbi.nlm.nih.gov/projects/gap/cgi-bin/analysis.cgi?id=pha002738</a> |
| Pulmonary | rcrosssectional  | rfefadjsm10      | residual from predicted FEF(25-75) at latest exam in 10+ packyear smokers   | <a href="http://www.ncbi.nlm.nih.gov/projects/gap/cgi-bin/analysis.cgi?id=pha002739">http://www.ncbi.nlm.nih.gov/projects/gap/cgi-bin/analysis.cgi?id=pha002739</a> |
| Pulmonary | rcrosssectional  | rfefratadj       | residual from predicted FEF(25-75)/FVC at latest exam                       | <a href="http://www.ncbi.nlm.nih.gov/projects/gap/cgi-bin/analysis.cgi?id=pha002740">http://www.ncbi.nlm.nih.gov/projects/gap/cgi-bin/analysis.cgi?id=pha002740</a> |
| Pulmonary | rcrosssectional  | rfefratadjsm10   | residual from predicted FEF(25-75)/FVC latest exam in 10+ packyear smokers  | <a href="http://www.ncbi.nlm.nih.gov/projects/gap/cgi-bin/analysis.cgi?id=pha002741">http://www.ncbi.nlm.nih.gov/projects/gap/cgi-bin/analysis.cgi?id=pha002741</a> |
| Pulmonary | rcrosssectional  | rfef1adj         | residual from predicted FEV1 at latest exam                                 | <a href="http://www.ncbi.nlm.nih.gov/projects/gap/cgi-bin/analysis.cgi?id=pha002742">http://www.ncbi.nlm.nih.gov/projects/gap/cgi-bin/analysis.cgi?id=pha002742</a> |
| Pulmonary | rcrosssectional  | rfef1adjsm10     | residual from predicted FEV1 at latest exam in 10+ packyear smokers         | <a href="http://www.ncbi.nlm.nih.gov/projects/gap/cgi-bin/analysis.cgi?id=pha002743">http://www.ncbi.nlm.nih.gov/projects/gap/cgi-bin/analysis.cgi?id=pha002743</a> |
| Pulmonary | rcrosssectional  | rfvcadj          | residual from predicted FVC at latest exam                                  | <a href="http://www.ncbi.nlm.nih.gov/projects/gap/cgi-bin/analysis.cgi?id=pha002744">http://www.ncbi.nlm.nih.gov/projects/gap/cgi-bin/analysis.cgi?id=pha002744</a> |
| Pulmonary | rcrosssectional  | rfvcadjsm10      | residual from predicted FVC at latest exam in 10+ packyear smokers          | <a href="http://www.ncbi.nlm.nih.gov/projects/gap/cgi-bin/analysis.cgi?id=pha002745">http://www.ncbi.nlm.nih.gov/projects/gap/cgi-bin/analysis.cgi?id=pha002745</a> |
| Pulmonary | rcrosssectional  | rratioadjsm10    | residual from predicted FEV1/FVC at latest exam in 10+ packyear smokers     | <a href="http://www.ncbi.nlm.nih.gov/projects/gap/cgi-bin/analysis.cgi?id=pha002746">http://www.ncbi.nlm.nih.gov/projects/gap/cgi-bin/analysis.cgi?id=pha002746</a> |
| Pulmonary | rcrosssectional  | rratioadjw       | residual from predicted FEV1/FVC at latest exam, linkage                    | <a href="http://www.ncbi.nlm.nih.gov/projects/gap/cgi-bin/analysis.cgi?id=pha002747">http://www.ncbi.nlm.nih.gov/projects/gap/cgi-bin/analysis.cgi?id=pha002747</a> |
| Pulmonary | singleexam       | ppfef1single     | percent predicted FEV1, exam: offspring 6, cohort 17                        | <a href="http://www.ncbi.nlm.nih.gov/projects/gap/cgi-bin/analysis.cgi?id=pha002748">http://www.ncbi.nlm.nih.gov/projects/gap/cgi-bin/analysis.cgi?id=pha002748</a> |
| Pulmonary | singleexam       | ppfvcsingle      | percent predicted FVC, exam: offspring 6, cohort 17                         | <a href="http://www.ncbi.nlm.nih.gov/projects/gap/cgi-bin/analysis.cgi?id=pha002749">http://www.ncbi.nlm.nih.gov/projects/gap/cgi-bin/analysis.cgi?id=pha002749</a> |
| Pulmonary | singleexam       | ppratioinglew    | percent predicted FEV1/FVC, exam: offspring 6, cohort 17, linkage           | <a href="http://www.ncbi.nlm.nih.gov/projects/gap/cgi-bin/analysis.cgi?id=pha002750">http://www.ncbi.nlm.nih.gov/projects/gap/cgi-bin/analysis.cgi?id=pha002750</a> |
| Pulmonary | singleexam       | rfef1single      | residual from predicted FEV1, exam: offspring 6, cohort 17                  | <a href="http://www.ncbi.nlm.nih.gov/projects/gap/cgi-bin/analysis.cgi?id=pha002751">http://www.ncbi.nlm.nih.gov/projects/gap/cgi-bin/analysis.cgi?id=pha002751</a> |
| Pulmonary | singleexam       | rfvcsingle       | residual from predicted FVC, exam: offspring 6, cohort 17                   | <a href="http://www.ncbi.nlm.nih.gov/projects/gap/cgi-bin/analysis.cgi?id=pha002752">http://www.ncbi.nlm.nih.gov/projects/gap/cgi-bin/analysis.cgi?id=pha002752</a> |
| Pulmonary | singleexam       | rratioinglew     | residual from predicted FEV1/FVC, exam: offspring 6, cohort 17, linkage     | <a href="http://www.ncbi.nlm.nih.gov/projects/gap/cgi-bin/analysis.cgi?id=pha002753">http://www.ncbi.nlm.nih.gov/projects/gap/cgi-bin/analysis.cgi?id=pha002753</a> |
| Pulmonary | Sleepiness       | ess              | Epworth Sleepiness Scale, unadjusted                                        | <a href="http://www.ncbi.nlm.nih.gov/projects/gap/cgi-bin/analysis.cgi?id=pha002754">http://www.ncbi.nlm.nih.gov/projects/gap/cgi-bin/analysis.cgi?id=pha002754</a> |
| Pulmonary | Sleepiness       | essresid1        | Epworth Sleepiness Scale, adjusted A                                        | <a href="http://www.ncbi.nlm.nih.gov/projects/gap/cgi-bin/analysis.cgi?id=pha002755">http://www.ncbi.nlm.nih.gov/projects/gap/cgi-bin/analysis.cgi?id=pha002755</a> |
| Pulmonary | Sleepiness       | essresid2        | Epworth Sleepiness Scale, adjusted B                                        | <a href="http://www.ncbi.nlm.nih.gov/projects/gap/cgi-bin/analysis.cgi?id=pha002756">http://www.ncbi.nlm.nih.gov/projects/gap/cgi-bin/analysis.cgi?id=pha002756</a> |
| Pulmonary | Sleepiness       | essresid3        | Epworth Sleepiness Scale, adjusted C                                        | <a href="http://www.ncbi.nlm.nih.gov/projects/gap/cgi-bin/analysis.cgi?id=pha002757">http://www.ncbi.nlm.nih.gov/projects/gap/cgi-bin/analysis.cgi?id=pha002757</a> |
| RENALENDO | ENDO             | DHEASAS3         | DHEAS adjusted for age and sex                                              | <a href="http://www.ncbi.nlm.nih.gov/projects/gap/cgi-bin/analysis.cgi?id=pha002758">http://www.ncbi.nlm.nih.gov/projects/gap/cgi-bin/analysis.cgi?id=pha002758</a> |
| RENALENDO | ENDO             | DHEASMV3         | DHEAS MV adjusted                                                           | <a href="http://www.ncbi.nlm.nih.gov/projects/gap/cgi-bin/analysis.cgi?id=pha002759">http://www.ncbi.nlm.nih.gov/projects/gap/cgi-bin/analysis.cgi?id=pha002759</a> |
| RENALENDO | ENDO             | FSHAS3           | FSH in men or post meno women no hormones, age-sex adjusted                 | <a href="http://www.ncbi.nlm.nih.gov/projects/gap/cgi-bin/analysis.cgi?id=pha002760">http://www.ncbi.nlm.nih.gov/projects/gap/cgi-bin/analysis.cgi?id=pha002760</a> |
| RENALENDO | ENDO             | FSHNV3           | FSH in men or post meno women no hormones, MV adjusted                      | <a href="http://www.ncbi.nlm.nih.gov/projects/gap/cgi-bin/analysis.cgi?id=pha002761">http://www.ncbi.nlm.nih.gov/projects/gap/cgi-bin/analysis.cgi?id=pha002761</a> |
| RENALENDO | ENDO             | LHAS3            | LH in men or post-meno women no hormones, age-sex adjusted                  | <a href="http://www.ncbi.nlm.nih.gov/projects/gap/cgi-bin/analysis.cgi?id=pha002762">http://www.ncbi.nlm.nih.gov/projects/gap/cgi-bin/analysis.cgi?id=pha002762</a> |
| RENALENDO | ENDO             | LHMV3            | LH in men or post-meno women no hormones, MV adjusted                       | <a href="http://www.ncbi.nlm.nih.gov/projects/gap/cgi-bin/analysis.cgi?id=pha002763">http://www.ncbi.nlm.nih.gov/projects/gap/cgi-bin/analysis.cgi?id=pha002763</a> |
| RENALENDO | ENDO             | TSHLNASNL3       | TSH ex3 log trans plus normalized deviates, age-sex adjusted                | <a href="http://www.ncbi.nlm.nih.gov/projects/gap/cgi-bin/analysis.cgi?id=pha002764">http://www.ncbi.nlm.nih.gov/projects/gap/cgi-bin/analysis.cgi?id=pha002764</a> |
| RENALENDO | ENDO             | TSHLNASNL4       | TSH ex4 log transformed plus normalized deviates, age-sex adjusted          | <a href="http://www.ncbi.nlm.nih.gov/projects/gap/cgi-bin/analysis.cgi?id=pha002765">http://www.ncbi.nlm.nih.gov/projects/gap/cgi-bin/analysis.cgi?id=pha002765</a> |
| RENALENDO | ENDO             | TSHLNMVNL3       | TSH ex3 log trans plus normalized deviates, MV adjusted                     | <a href="http://www.ncbi.nlm.nih.gov/projects/gap/cgi-bin/analysis.cgi?id=pha002766">http://www.ncbi.nlm.nih.gov/projects/gap/cgi-bin/analysis.cgi?id=pha002766</a> |
| RENALENDO | ENDO             | TSHLNMVNL4       | TSH ex4 log trans plus normalized deviates, MV adjusted                     | <a href="http://www.ncbi.nlm.nih.gov/projects/gap/cgi-bin/analysis.cgi?id=pha002767">http://www.ncbi.nlm.nih.gov/projects/gap/cgi-bin/analysis.cgi?id=pha002767</a> |
| RENALENDO | ENDO             | TSHMEAN34LNASNL  | Mean TSH log transformed plus normalized deviates, ex 3 and 4, age sex adj  | <a href="http://www.ncbi.nlm.nih.gov/projects/gap/cgi-bin/analysis.cgi?id=pha002768">http://www.ncbi.nlm.nih.gov/projects/gap/cgi-bin/analysis.cgi?id=pha002768</a> |
| RENALENDO | ENDO             | TSHMEAN34LNMVNL  | Mean TSH ex3 and 4 log transformed plus normalized deviates MV adjusted     | <a href="http://www.ncbi.nlm.nih.gov/projects/gap/cgi-bin/analysis.cgi?id=pha002769">http://www.ncbi.nlm.nih.gov/projects/gap/cgi-bin/analysis.cgi?id=pha002769</a> |
| RENALENDO | RENAL            | CALCIUMAS2       | Calcium, ex2, age-sex adjusted                                              | <a href="http://www.ncbi.nlm.nih.gov/projects/gap/cgi-bin/analysis.cgi?id=pha002770">http://www.ncbi.nlm.nih.gov/projects/gap/cgi-bin/analysis.cgi?id=pha002770</a> |
| RENALENDO | RENAL            | CALCIUMMV2       | Calcium, ex2, age-sex-creatinine adjusted                                   | <a href="http://www.ncbi.nlm.nih.gov/projects/gap/cgi-bin/analysis.cgi?id=pha002771">http://www.ncbi.nlm.nih.gov/projects/gap/cgi-bin/analysis.cgi?id=pha002771</a> |
| RENALENDO | RENAL            | CHNGSCR27ASWIN   | Change in creatinine ex2 to 7, age-sex adjusted                             | <a href="http://www.ncbi.nlm.nih.gov/projects/gap/cgi-bin/analysis.cgi?id=pha002772">http://www.ncbi.nlm.nih.gov/projects/gap/cgi-bin/analysis.cgi?id=pha002772</a> |
| RENALENDO | RENAL            | CHNGSCR27MVWIN   | Change in creatinine ex2 to 7, MV adjusted                                  | <a href="http://www.ncbi.nlm.nih.gov/projects/gap/cgi-bin/analysis.cgi?id=pha002773">http://www.ncbi.nlm.nih.gov/projects/gap/cgi-bin/analysis.cgi?id=pha002773</a> |
| RENALENDO | RENAL            | CYSCAS7          | Cystatin C, ex 7, age-sex adjusted                                          | <a href="http://www.ncbi.nlm.nih.gov/projects/gap/cgi-bin/analysis.cgi?id=pha002808">http://www.ncbi.nlm.nih.gov/projects/gap/cgi-bin/analysis.cgi?id=pha002808</a> |
| RENALENDO | RENAL            | CYSCMV7          | Cystatin C, ex 7, MV adjusted                                               | <a href="http://www.ncbi.nlm.nih.gov/projects/gap/cgi-bin/analysis.cgi?id=pha002809">http://www.ncbi.nlm.nih.gov/projects/gap/cgi-bin/analysis.cgi?id=pha002809</a> |
| RENALENDO | RENAL            | GFRAS7           | GFR ex 7, age-sex adjusted                                                  | <a href="http://www.ncbi.nlm.nih.gov/projects/gap/cgi-bin/analysis.cgi?id=pha002774">http://www.ncbi.nlm.nih.gov/projects/gap/cgi-bin/analysis.cgi?id=pha002774</a> |
| RENALENDO | RENAL            | GFRASNL5         | GFR ex 5 normalized deviates, age-sex adjusted                              | <a href="http://www.ncbi.nlm.nih.gov/projects/gap/cgi-bin/analysis.cgi?id=pha002775">http://www.ncbi.nlm.nih.gov/projects/gap/cgi-bin/analysis.cgi?id=pha002775</a> |
| RENALENDO | RENAL            | GFRASNL6         | GFR ex6 normalized deviates age-sex adjusted                                | <a href="http://www.ncbi.nlm.nih.gov/projects/gap/cgi-bin/analysis.cgi?id=pha002776">http://www.ncbi.nlm.nih.gov/projects/gap/cgi-bin/analysis.cgi?id=pha002776</a> |
| RENALENDO | RENAL            | GFRASWIN2        | GFR ex2, winsorized, age-sex adjusted                                       | <a href="http://www.ncbi.nlm.nih.gov/projects/gap/cgi-bin/analysis.cgi?id=pha002777">http://www.ncbi.nlm.nih.gov/projects/gap/cgi-bin/analysis.cgi?id=pha002777</a> |
| RENALENDO | RENAL            | GFRMV7           | GFR ex7, MV adjusted                                                        | <a href="http://www.ncbi.nlm.nih.gov/projects/gap/cgi-bin/analysis.cgi?id=pha002778">http://www.ncbi.nlm.nih.gov/projects/gap/cgi-bin/analysis.cgi?id=pha002778</a> |
| RENALENDO | RENAL            | GFRMVNL5         | GFR ex5 normalized deviates, MV adjusted                                    | <a href="http://www.ncbi.nlm.nih.gov/projects/gap/cgi-bin/analysis.cgi?id=pha002779">http://www.ncbi.nlm.nih.gov/projects/gap/cgi-bin/analysis.cgi?id=pha002779</a> |
| RENALENDO | RENAL            | GFRMVNL6         | GFR ex6 normalized deviates MV adjusted                                     | <a href="http://www.ncbi.nlm.nih.gov/projects/gap/cgi-bin/analysis.cgi?id=pha002780">http://www.ncbi.nlm.nih.gov/projects/gap/cgi-bin/analysis.cgi?id=pha002780</a> |
| RENALENDO | RENAL            | GFRMVWIN2        | GFR ex2, winsorized, MV adjusted                                            | <a href="http://www.ncbi.nlm.nih.gov/projects/gap/cgi-bin/analysis.cgi?id=pha002781">http://www.ncbi.nlm.nih.gov/projects/gap/cgi-bin/analysis.cgi?id=pha002781</a> |
| RENALENDO | RENAL            | MeanGFRAS2567WIN | Mean GFR ex 2,5,6,7 age-sex adjusted                                        | <a href="http://www.ncbi.nlm.nih.gov/projects/gap/cgi-bin/analysis.cgi?id=pha002782">http://www.ncbi.nlm.nih.gov/projects/gap/cgi-bin/analysis.cgi?id=pha002782</a> |

Online Table 3: Phenotypes Evaluated for Linkage

| Group      | Category            | Trait Label        | Name                                                                            | Linkage Link                                                                                                                                                        |
|------------|---------------------|--------------------|---------------------------------------------------------------------------------|---------------------------------------------------------------------------------------------------------------------------------------------------------------------|
| RENALEND   | RENAL               | MeanGFRMV2567WIN   | Mean GFR ex 2,5,6,7,MV adjusted                                                 | <a href="http://www.ncbi.nlm.nih.gov/projects/gap/cgi-bin/analysis.cgi?id=pha002783">http://www.ncbi.nlm.nih.gov/projects/gap/cgi-bin/analysis.cgi?id=pha002783</a> |
| RENALEND   | RENAL               | MeanSCR2567LNASWIN | Mean creatinine ex 2,5,6,7 age-sex adjusted                                     | <a href="http://www.ncbi.nlm.nih.gov/projects/gap/cgi-bin/analysis.cgi?id=pha002784">http://www.ncbi.nlm.nih.gov/projects/gap/cgi-bin/analysis.cgi?id=pha002784</a> |
| RENALEND   | RENAL               | MeanSCR2567LNMVWIN | Mean creatinine ex 2,5,6,7, MV adjusted                                         | <a href="http://www.ncbi.nlm.nih.gov/projects/gap/cgi-bin/analysis.cgi?id=pha002785">http://www.ncbi.nlm.nih.gov/projects/gap/cgi-bin/analysis.cgi?id=pha002785</a> |
| RENALEND   | RENAL               | MeanURICACID12AS   | Mean uric acid, ex 1 and 2, age-sex adjusted                                    | <a href="http://www.ncbi.nlm.nih.gov/projects/gap/cgi-bin/analysis.cgi?id=pha002786">http://www.ncbi.nlm.nih.gov/projects/gap/cgi-bin/analysis.cgi?id=pha002786</a> |
| RENALEND   | RENAL               | MeanURICACID12MV   | Mean uric acid, ex 1 and 2, MV adjusted                                         | <a href="http://www.ncbi.nlm.nih.gov/projects/gap/cgi-bin/analysis.cgi?id=pha002787">http://www.ncbi.nlm.nih.gov/projects/gap/cgi-bin/analysis.cgi?id=pha002787</a> |
| RENALEND   | RENAL               | PHOSAS2            | Phos, ex 2, age-sex adjusted                                                    | <a href="http://www.ncbi.nlm.nih.gov/projects/gap/cgi-bin/analysis.cgi?id=pha002788">http://www.ncbi.nlm.nih.gov/projects/gap/cgi-bin/analysis.cgi?id=pha002788</a> |
| RENALEND   | RENAL               | PHOSMV2            | Phos, ex 2, MV adjusted                                                         | <a href="http://www.ncbi.nlm.nih.gov/projects/gap/cgi-bin/analysis.cgi?id=pha002789">http://www.ncbi.nlm.nih.gov/projects/gap/cgi-bin/analysis.cgi?id=pha002789</a> |
| RENALEND   | RENAL               | SCRLNASNL5         | Creatinine, ex5 normalized deviates, age-sex adjusted                           | <a href="http://www.ncbi.nlm.nih.gov/projects/gap/cgi-bin/analysis.cgi?id=pha002790">http://www.ncbi.nlm.nih.gov/projects/gap/cgi-bin/analysis.cgi?id=pha002790</a> |
| RENALEND   | RENAL               | SCRLNASNL6         | Ceatinine, ex6 normalized deviates, age-sex adjusted                            | <a href="http://www.ncbi.nlm.nih.gov/projects/gap/cgi-bin/analysis.cgi?id=pha002791">http://www.ncbi.nlm.nih.gov/projects/gap/cgi-bin/analysis.cgi?id=pha002791</a> |
| RENALEND   | RENAL               | SCRLNASWIN2        | Creatinine ex2, log transformed and winsorized, age-sex adjusted                | <a href="http://www.ncbi.nlm.nih.gov/projects/gap/cgi-bin/analysis.cgi?id=pha002792">http://www.ncbi.nlm.nih.gov/projects/gap/cgi-bin/analysis.cgi?id=pha002792</a> |
| RENALEND   | RENAL               | SCRLNASWIN7        | Creatinine ex7, log transformed and winsorized, age-sex adjusted                | <a href="http://www.ncbi.nlm.nih.gov/projects/gap/cgi-bin/analysis.cgi?id=pha002793">http://www.ncbi.nlm.nih.gov/projects/gap/cgi-bin/analysis.cgi?id=pha002793</a> |
| RENALEND   | RENAL               | SCRLNMVNL5         | GFR ex 5 uncalibrated creat normalized deviates, MV adjusted                    | <a href="http://www.ncbi.nlm.nih.gov/projects/gap/cgi-bin/analysis.cgi?id=pha002794">http://www.ncbi.nlm.nih.gov/projects/gap/cgi-bin/analysis.cgi?id=pha002794</a> |
| RENALEND   | RENAL               | SCRLNMVNL6         | GFR ex6 uncalibrated creat normalized deviates, MV adjusted                     | <a href="http://www.ncbi.nlm.nih.gov/projects/gap/cgi-bin/analysis.cgi?id=pha002795">http://www.ncbi.nlm.nih.gov/projects/gap/cgi-bin/analysis.cgi?id=pha002795</a> |
| RENALEND   | RENAL               | SCRLNMVWIN2        | Creatinine ex 2 log transformed winsorized MV adjusted                          | <a href="http://www.ncbi.nlm.nih.gov/projects/gap/cgi-bin/analysis.cgi?id=pha002796">http://www.ncbi.nlm.nih.gov/projects/gap/cgi-bin/analysis.cgi?id=pha002796</a> |
| RENALEND   | RENAL               | SCRLNMVWIN7        | Creatinine ex 7 uncalibrated MV adjusted                                        | <a href="http://www.ncbi.nlm.nih.gov/projects/gap/cgi-bin/analysis.cgi?id=pha002797">http://www.ncbi.nlm.nih.gov/projects/gap/cgi-bin/analysis.cgi?id=pha002797</a> |
| RENALEND   | RENAL               | UAE LNASNL6        | Log-transformed UAE, age-sex adjusted, linkage                                  | <a href="http://www.ncbi.nlm.nih.gov/projects/gap/cgi-bin/analysis.cgi?id=pha002798">http://www.ncbi.nlm.nih.gov/projects/gap/cgi-bin/analysis.cgi?id=pha002798</a> |
| RENALEND   | RENAL               | UAE LNHTNASNL6     | Log-transformed UAE in HTN enriched sample, age-sex adjusted, linkage           | <a href="http://www.ncbi.nlm.nih.gov/projects/gap/cgi-bin/analysis.cgi?id=pha002799">http://www.ncbi.nlm.nih.gov/projects/gap/cgi-bin/analysis.cgi?id=pha002799</a> |
| RENALEND   | RENAL               | UAE LNHTNMVNL6     | Log-transformed UAE in HTN enriched sample, MV adjusted-linkage                 | <a href="http://www.ncbi.nlm.nih.gov/projects/gap/cgi-bin/analysis.cgi?id=pha002800">http://www.ncbi.nlm.nih.gov/projects/gap/cgi-bin/analysis.cgi?id=pha002800</a> |
| RENALEND   | RENAL               | UAE LNMMVNL6       | Log-transformed UAE MV adjusted-linkage                                         | <a href="http://www.ncbi.nlm.nih.gov/projects/gap/cgi-bin/analysis.cgi?id=pha002801">http://www.ncbi.nlm.nih.gov/projects/gap/cgi-bin/analysis.cgi?id=pha002801</a> |
| RENALEND   | RENAL               | UNALNASWIN6        | Urinary sodium, age-sex adjusted                                                | <a href="http://www.ncbi.nlm.nih.gov/projects/gap/cgi-bin/analysis.cgi?id=pha002802">http://www.ncbi.nlm.nih.gov/projects/gap/cgi-bin/analysis.cgi?id=pha002802</a> |
| RENALEND   | RENAL               | UNALNMVWIN6        | Urinary sodium, MV adjusted                                                     | <a href="http://www.ncbi.nlm.nih.gov/projects/gap/cgi-bin/analysis.cgi?id=pha002803">http://www.ncbi.nlm.nih.gov/projects/gap/cgi-bin/analysis.cgi?id=pha002803</a> |
| RENALEND   | RENAL               | URICACIDAS1        | Uric acid, ex 1, age-sex adjusted                                               | <a href="http://www.ncbi.nlm.nih.gov/projects/gap/cgi-bin/analysis.cgi?id=pha002804">http://www.ncbi.nlm.nih.gov/projects/gap/cgi-bin/analysis.cgi?id=pha002804</a> |
| RENALEND   | RENAL               | URICACIDAS2        | Uric acid, ex 2, age-sex adjusted                                               | <a href="http://www.ncbi.nlm.nih.gov/projects/gap/cgi-bin/analysis.cgi?id=pha002805">http://www.ncbi.nlm.nih.gov/projects/gap/cgi-bin/analysis.cgi?id=pha002805</a> |
| RENALEND   | RENAL               | URICACIDMV1        | Uric acid, ex1, MV adjusted                                                     | <a href="http://www.ncbi.nlm.nih.gov/projects/gap/cgi-bin/analysis.cgi?id=pha002806">http://www.ncbi.nlm.nih.gov/projects/gap/cgi-bin/analysis.cgi?id=pha002806</a> |
| RENALEND   | RENAL               | URICACIDMV2        | Uric acid, ex2, MV adjusted                                                     | <a href="http://www.ncbi.nlm.nih.gov/projects/gap/cgi-bin/analysis.cgi?id=pha002807">http://www.ncbi.nlm.nih.gov/projects/gap/cgi-bin/analysis.cgi?id=pha002807</a> |
| SubclinCVD | Ankle-brachialindex | RANKLEBI6          | Ankle-brachial index, cycle 6, age and sex-djusted                              | <a href="http://www.ncbi.nlm.nih.gov/projects/gap/cgi-bin/analysis.cgi?id=pha002810">http://www.ncbi.nlm.nih.gov/projects/gap/cgi-bin/analysis.cgi?id=pha002810</a> |
| SubclinCVD | Ankle-brachialindex | RANKLEBI6MV        | Ankle-brachial index, cycle 6, multivariable-adjusted                           | <a href="http://www.ncbi.nlm.nih.gov/projects/gap/cgi-bin/analysis.cgi?id=pha002811">http://www.ncbi.nlm.nih.gov/projects/gap/cgi-bin/analysis.cgi?id=pha002811</a> |
| SubclinCVD | Ankle-brachialindex | RANKLEBI7          | Ankle-brachial index, cycle 7, age- and sex-adjusted                            | <a href="http://www.ncbi.nlm.nih.gov/projects/gap/cgi-bin/analysis.cgi?id=pha002812">http://www.ncbi.nlm.nih.gov/projects/gap/cgi-bin/analysis.cgi?id=pha002812</a> |
| SubclinCVD | Ankle-brachialindex | RANKLEBI7MV        | Ankle-brachial index, cycle 7, multivariable-adjusted                           | <a href="http://www.ncbi.nlm.nih.gov/projects/gap/cgi-bin/analysis.cgi?id=pha002813">http://www.ncbi.nlm.nih.gov/projects/gap/cgi-bin/analysis.cgi?id=pha002813</a> |
| SubclinCVD | BrainMRI            | BMRILWMHVC         | Log white matter hyperintensity to intracranial volume ratio, age and sex       | <a href="http://www.ncbi.nlm.nih.gov/projects/gap/cgi-bin/analysis.cgi?id=pha002814">http://www.ncbi.nlm.nih.gov/projects/gap/cgi-bin/analysis.cgi?id=pha002814</a> |
| SubclinCVD | BrainMRI            | BMRILWMHVMV        | Log white matter hyperintensity to intracranial volume ratio, multivariable     | <a href="http://www.ncbi.nlm.nih.gov/projects/gap/cgi-bin/analysis.cgi?id=pha002815">http://www.ncbi.nlm.nih.gov/projects/gap/cgi-bin/analysis.cgi?id=pha002815</a> |
| SubclinCVD | BrainMRI            | BMRIZLWMHVC        | Z-score log white matter hyperintensity volume ratio, sex adjusted              | <a href="http://www.ncbi.nlm.nih.gov/projects/gap/cgi-bin/analysis.cgi?id=pha002816">http://www.ncbi.nlm.nih.gov/projects/gap/cgi-bin/analysis.cgi?id=pha002816</a> |
| SubclinCVD | BrainMRI            | BMRIZLWMHVMV       | Z-score log white matter hyperintensity volume ratio, multivariable             | <a href="http://www.ncbi.nlm.nih.gov/projects/gap/cgi-bin/analysis.cgi?id=pha002817">http://www.ncbi.nlm.nih.gov/projects/gap/cgi-bin/analysis.cgi?id=pha002817</a> |
| SubclinCVD | Carotid             | RNKCAROTBULBAS6    | Carotid bulb IMT mean max, cycle 6, log transformed age and sex-adjusted        | <a href="http://www.ncbi.nlm.nih.gov/projects/gap/cgi-bin/analysis.cgi?id=pha002818">http://www.ncbi.nlm.nih.gov/projects/gap/cgi-bin/analysis.cgi?id=pha002818</a> |
| SubclinCVD | Carotid             | RNKCAROTBULBMV6    | Carotid bulb IMT mean max, cycle 6, log transformed multivariable-adjusted      | <a href="http://www.ncbi.nlm.nih.gov/projects/gap/cgi-bin/analysis.cgi?id=pha002819">http://www.ncbi.nlm.nih.gov/projects/gap/cgi-bin/analysis.cgi?id=pha002819</a> |
| SubclinCVD | Carotid             | RNKCAROTCCAMAXAS6  | Common carotid IMT mean max, cycle 6, log transformed age and sex-adjusted      | <a href="http://www.ncbi.nlm.nih.gov/projects/gap/cgi-bin/analysis.cgi?id=pha002820">http://www.ncbi.nlm.nih.gov/projects/gap/cgi-bin/analysis.cgi?id=pha002820</a> |
| SubclinCVD | Carotid             | RNKCAROTCCAMAXMV6  | Common carotid IMT mean max, cycle 6, log transformed multivariable-adjusted    | <a href="http://www.ncbi.nlm.nih.gov/projects/gap/cgi-bin/analysis.cgi?id=pha002821">http://www.ncbi.nlm.nih.gov/projects/gap/cgi-bin/analysis.cgi?id=pha002821</a> |
| SubclinCVD | Carotid             | RNKCAROTCCAMEANAS6 | Common carotid IMT mean mean, cycle 6, log transformed age and sex-adjusted     | <a href="http://www.ncbi.nlm.nih.gov/projects/gap/cgi-bin/analysis.cgi?id=pha002822">http://www.ncbi.nlm.nih.gov/projects/gap/cgi-bin/analysis.cgi?id=pha002822</a> |
| SubclinCVD | Carotid             | RNKCAROTCCAMEANMV6 | Common carotid IMT mean mean, cycle 6, log transformed multivariable-adjusted   | <a href="http://www.ncbi.nlm.nih.gov/projects/gap/cgi-bin/analysis.cgi?id=pha002823">http://www.ncbi.nlm.nih.gov/projects/gap/cgi-bin/analysis.cgi?id=pha002823</a> |
| SubclinCVD | Carotid             | RNKCAROTICAMAXAS6  | Internal carotid IMT mean max, cycle 6, log transformed age and sex-adjusted    | <a href="http://www.ncbi.nlm.nih.gov/projects/gap/cgi-bin/analysis.cgi?id=pha002824">http://www.ncbi.nlm.nih.gov/projects/gap/cgi-bin/analysis.cgi?id=pha002824</a> |
| SubclinCVD | Carotid             | RNKCAROTICAMAXMV6  | Internal carotid IMT mean max, cycle 6, log transformed multivariable-adjusted  | <a href="http://www.ncbi.nlm.nih.gov/projects/gap/cgi-bin/analysis.cgi?id=pha002825">http://www.ncbi.nlm.nih.gov/projects/gap/cgi-bin/analysis.cgi?id=pha002825</a> |
| SubclinCVD | Carotid             | RNKCAROTICAMEANAS6 | Internal carotid IMT mean mean, cycle 6, log transformed age and sex-adjusted   | <a href="http://www.ncbi.nlm.nih.gov/projects/gap/cgi-bin/analysis.cgi?id=pha002826">http://www.ncbi.nlm.nih.gov/projects/gap/cgi-bin/analysis.cgi?id=pha002826</a> |
| SubclinCVD | Carotid             | RNKCAROTICAMEANMV6 | Internal carotid IMT mean mean, cycle 6, log transformed multivariable-adjusted | <a href="http://www.ncbi.nlm.nih.gov/projects/gap/cgi-bin/analysis.cgi?id=pha002827">http://www.ncbi.nlm.nih.gov/projects/gap/cgi-bin/analysis.cgi?id=pha002827</a> |
| SubclinCVD | Carotid             | RNKCAROTSTENAS6    | Maximum Carotid Stenosis, cycle 6, age and sex-adjusted                         | <a href="http://www.ncbi.nlm.nih.gov/projects/gap/cgi-bin/analysis.cgi?id=pha002828">http://www.ncbi.nlm.nih.gov/projects/gap/cgi-bin/analysis.cgi?id=pha002828</a> |
| SubclinCVD | Carotid             | RNKCAROTSTENMV6    | Maximum Carotid Stenosis, cycle 6 multivariable-adjusted                        | <a href="http://www.ncbi.nlm.nih.gov/projects/gap/cgi-bin/analysis.cgi?id=pha002829">http://www.ncbi.nlm.nih.gov/projects/gap/cgi-bin/analysis.cgi?id=pha002829</a> |
| SubclinCVD | CT                  | RESMDCTAACAS7      | Mean Agatston AAC score, MDCT ~cycle 7, log transform, age and sex-adjusted     | <a href="http://www.ncbi.nlm.nih.gov/projects/gap/cgi-bin/analysis.cgi?id=pha002830">http://www.ncbi.nlm.nih.gov/projects/gap/cgi-bin/analysis.cgi?id=pha002830</a> |
| SubclinCVD | CT                  | RESMDCTAACMV7      | Mean Agatston AAC score, MDCT ~cycle 7, log transform multivariable-adjusted    | <a href="http://www.ncbi.nlm.nih.gov/projects/gap/cgi-bin/analysis.cgi?id=pha002831">http://www.ncbi.nlm.nih.gov/projects/gap/cgi-bin/analysis.cgi?id=pha002831</a> |
| SubclinCVD | CT                  | RESMDCTCACAS7      | Mean Agatston CAC score, MDCT ~cycle 7, log transform age and sex-adjusted      | <a href="http://www.ncbi.nlm.nih.gov/projects/gap/cgi-bin/analysis.cgi?id=pha002832">http://www.ncbi.nlm.nih.gov/projects/gap/cgi-bin/analysis.cgi?id=pha002832</a> |
| SubclinCVD | CT                  | RESMDCTCACMAXAS7   | Max Agatston CAC score, MDCT ~cycle 7, log transform age and sex-adjusted       | <a href="http://www.ncbi.nlm.nih.gov/projects/gap/cgi-bin/analysis.cgi?id=pha002833">http://www.ncbi.nlm.nih.gov/projects/gap/cgi-bin/analysis.cgi?id=pha002833</a> |
| SubclinCVD | CT                  | RESMDCTCACMAXMV7   | Max Agatston CAC score, MDCT ~cycle 7, log transform multivariable-adjusted     | <a href="http://www.ncbi.nlm.nih.gov/projects/gap/cgi-bin/analysis.cgi?id=pha002834">http://www.ncbi.nlm.nih.gov/projects/gap/cgi-bin/analysis.cgi?id=pha002834</a> |
| SubclinCVD | CT                  | RESMDCTCACMV7      | Mean Agatston CAC score, MDCT ~cycle 7, log transform multivariable-adjusted    | <a href="http://www.ncbi.nlm.nih.gov/projects/gap/cgi-bin/analysis.cgi?id=pha002835">http://www.ncbi.nlm.nih.gov/projects/gap/cgi-bin/analysis.cgi?id=pha002835</a> |
